# Supplementary material for: Complete integration of carbene transfer chemistry into biosynthesis
Source: PubMed Central journal article supplement (PMC11334723; doi:10.1038/s41586-023-06027-2), 2023-05-03
Supplement: NIHMS2008550-supplement-Supplementary_information.pdf [file NIHMS2008550-supplement-Supplementary_information.pdf]

## Supplementary information

### Complete integration of carbene transfer chemistry into biosynthesis

**Authors:** Jing Huang<sup>1,2,3</sup>, Andrew Quest<sup>4,5</sup>, Pablo Cruz-Morales<sup>1,2,6</sup>, Kai Deng<sup>2,7</sup>, Jose Henrique Pereira<sup>2,8</sup>, Devon Van Cura<sup>9</sup>, Ramu Kakumanu<sup>1,2</sup>, Edward E. K. Baidoo<sup>1,2</sup>, Qingyun Dan<sup>1,2</sup>, Yan Chen<sup>1,2</sup>, Christopher J. Petzold<sup>1,2</sup>, Trent R. Northen<sup>2,11</sup>, Paul D. Adams<sup>2,8,12</sup>, Douglas S. Clark<sup>3,8\*</sup>, Emily P. Balskus<sup>9,10</sup>, John F. Hartwig<sup>4,5\*</sup>, Aindrila Mukhopadhyay<sup>1,2,11\*</sup>, Jay D. Keasling<sup>1,2,3,6,12,13\*</sup>

#### Affiliations:

<sup>1</sup>Biological Systems and Engineering Division, Lawrence Berkeley National Laboratory, Berkeley, CA, USA.

<sup>2</sup>Joint BioEnergy Institute, Lawrence Berkeley National Laboratory, Emeryville, CA, USA.

<sup>3</sup>Department of Chemical and Biomolecular Engineering, University of California, Berkeley, CA, USA.

<sup>4</sup>Department of Chemistry, University of California, Berkeley, CA, USA.

<sup>5</sup>Chemical Sciences Division, Lawrence Berkeley National Laboratory, Berkeley, CA, USA.

<sup>6</sup>Novo Nordisk Foundation Center for Biosustainability, Technical University of Denmark, Kongens Lyngby, Denmark.

<sup>7</sup>Department of Biomaterials and Biomanufacturing, Sandia National Laboratories, Livermore, CA, USA.

<sup>8</sup>Molecular Biophysics and Integrated Bioimaging Division, Lawrence Berkeley National Laboratory, Berkeley, CA, USA.

<sup>9</sup>Department of Chemistry and Chemical Biology, Harvard University, Cambridge, MA, USA.

<sup>10</sup>Howard Hughes Medical Institute, Harvard University, Cambridge, MA, USA.

<sup>11</sup>Environmental Genomics and Systems Biology Division, Lawrence Berkeley National Laboratory, Berkeley, CA, USA.

<sup>12</sup>Department of Bioengineering, University of California, Berkeley, CA, USA.

<sup>13</sup>Synthetic Biochemistry Center, Institute for Synthetic Biology, Shenzhen Institutes for Advanced Technologies, Shenzhen, China.

\*Correspondence to: [dsc@berkeley.edu](mailto:dsc@berkeley.edu), [jhartwig@berkeley.edu](mailto:jhartwig@berkeley.edu), [amukhopadhyay@lbl.gov](mailto:amukhopadhyay@lbl.gov), [keasling@berkeley.edu](mailto:keasling@berkeley.edu)

## **Table of contents:**

|                                                                 |            |
|-----------------------------------------------------------------|------------|
| Supplementary Table 1 Initially screened P450s                  | Page 4     |
| Supplementary Table 2 Plasmids used in this study               | Page 4-5   |
| Supplementary Table 3 Data collection and refinement statistics | Page 5     |
| DNA and protein sequences                                       | Page 6-8   |
| Synthesis of compounds                                          | Page 9-31  |
| Supplementary Fig. 1 LC-MS traces of authentic aza-sty products | Page 32    |
| NMR spectra (Supplementary Fig. 2 to 37)                        | Page 33-68 |
| Supplementary Fig. 38 Raw gel image                             | Page 69    |
| References                                                      | Page 69-70 |

**Supplementary Table 1 | Initially screened P450s**

| Protein                | Mutations                         | Description                  |
|------------------------|-----------------------------------|------------------------------|
| TbtJ1 <sup>65</sup>    | NO                                |                              |
| TbtJ1 <sup>65</sup>    | C340S                             |                              |
| P450-T2 <sup>66</sup>  | NO                                |                              |
| CYP119 <sup>67</sup>   | T213G, V254A, L155W, R256W        |                              |
| CYP119 <sup>67</sup>   | T213G, V254A, L155W, R256W, C317S | Mutant shown in Fig. 3a      |
| P450 BM3 <sup>68</sup> | T268A, C400S, L437W, V78M, L181V  | Only heme domain of P450 BM3 |
| P450 BM3 <sup>68</sup> | T268A, C400S, L437W, V78M, L181V  | Full length P450 BM3         |

**Supplementary Table 2 | Plasmids used in this study**

| Name                      | Part ID <sup>a</sup>            | Description                                                                                                                                                                                                                                       |
|---------------------------|---------------------------------|---------------------------------------------------------------------------------------------------------------------------------------------------------------------------------------------------------------------------------------------------|
| pAZA007                   | JBx_233142                      | Plasmid containing azaserine gene cluster from <i>S. fragilis</i> (other genes: apramycin resistance gene, phi C31 integrase gene).<br>Individual genes in the azaserine gene cluster (aza1 to aza23) with Part ID from JBx_232920 to JBx_232942. |
| pAZA121<br>and<br>pAZA138 | JBx_233144<br>and<br>JBx_236844 | Plasmid containing genes for styrene biosynthesis in <i>S. albus</i> (other genes: spectinomycin resistance gene, VWB integrase gene)                                                                                                             |
| pAZA128                   | JBx_233146                      | Plasmid containing evolved P50-T2-5 mutant gene and genes for styrene biosynthesis in <i>S. albus</i> (other genes: spectinomycin resistance gene, VWB integrase gene)                                                                            |
| pAZA132                   | JBx_233148                      | Plasmid containing 2 copies of evolved P50-T2-5 mutant gene and genes for styrene biosynthesis in <i>S. albus</i> (other genes: spectinomycin resistance gene, VWB integrase gene)                                                                |
| pAZA037                   | JBx_233150                      | Plasmid containing P450-T2 WT gene under control of T7 promoter for expression in <i>E. coli</i>                                                                                                                                                  |

|         |            |                                                                                                   |
|---------|------------|---------------------------------------------------------------------------------------------------|
| pAZA076 | JBx_233862 | Plasmid containing CYP203A1 WT gene under control of T7 promoter for expression in <i>E. coli</i> |
|---------|------------|---------------------------------------------------------------------------------------------------|

<sup>a</sup>The accession code in the public version of JBEI registry (<http://public-registry.jbei.org>).

### Supplementary Table 3 | Data collection and refinement statistics

| <b>P450-T2*</b>                |                                 |
|--------------------------------|---------------------------------|
| <b><i>Data collection</i></b>  |                                 |
| Space group                    | P 2 21 21                       |
| Unit-Cell parameters (Å)       | a=85.93 b=95.61 and<br>c=100.43 |
| Resolution range (Å)           | 41.78 - 1.53 (1.585 - 1.53)     |
| R <sub>merge</sub> (%)         | 0.059 (1.56)                    |
| <i>I</i> / $\sigma$ <i>I</i>   | 15.7 (0.9)                      |
| Completeness (%)               | 100 (99.7)                      |
| Redundancy                     | 7.0 (5.4)                       |
| CC <sub>1/2</sub>              | 0.999 (0.367)                   |
| <b><i>Refinement</i></b>       |                                 |
| Resolution range (Å)           | 41.78 - 1.53 (1.585 - 1.53)     |
| Reflections used in refinement | 119251 (10768)                  |
| R <sub>work</sub>              | 0.160 (0.238)                   |
| R <sub>free</sub>              | 0.186 (0.283)                   |
| No. atoms                      |                                 |
| Proteins                       | 6188                            |
| Ligands/ion                    | 146                             |
| Water                          | 1035                            |
| RMS from ideal geometry        |                                 |
| Bond lengths (Å)               | 0.006                           |
| Bond angles (°)                | 0.85                            |
| Average B-factor               | 26.7                            |
| Macromolecules                 | 25.4                            |
| Ligands                        | 16.1                            |
| Solvent                        | 34.3                            |

\* Data from a single crystal was used for P450-T2 structure.

# Values in parentheses are for highest-resolution shell.

## DNA and protein sequences

P450-T2 protein sequence (on pAZA037, residues underlined as N-terminal tag, residue in bold numbered as the 1<sup>st</sup> residue)

MKSSHHHHHHGSSGMMGLGSFHFDPYSPAIDADPFPSYKRLRDEFPCFWSEEAQMWILSR  
YSDIVTAGQDWQTYSSASGNLMTELPGRAGATLGSSDPPKHDRLRGLIQHAFMKRNLM  
ALEEPIRDVAKQVFAQVKGVKEFDKDVSSQFTVKVLMALGLPMGEDALVPEHEVRE  
NAVLMVQSDARTRAKGPEHIAAYNWMQDYASKVIAMRRASPQNDLISNFALAEIDGDR  
LDDREVLTTTTLIMAGVESLGGFMMMFAYNLATFDEARRAVVANPALLPDAIEESLRF  
NTSAQRFRRRLMKDVTLHGQTMKEGDFVCLAYGSGNRDERQYPNPDVYDIARKPRGH  
LGFGGGVHACLGTAIARLAVKIAFEFHQVVPDYRRVADQLPWMPSSSTFRSPLVLQLKA  
Q\*

Codon optimized DNA sequence of P450-T2 for expression in *E. coli*

ATGAAATCTTCTCACCATCACCATCACCATGGTAGTTCGGGCATGGGATTAGGTAGC  
TTCCACTTCGACCCCTACAGTCCGGCGATCGACGCTGACCCCTTCCCTAGTTATAAA  
CGCTTGCGCGATGAGTTCCCCTGCTTCTGGTCTGAAGAGGCCCAAATGTGGATTCTT  
TCGCGCTACTCTGATATCGTCACTGCGGGTCAGGACTGGCAAACCTATTCATCGGCC  
AGCGGGAACCTAATGACTGAATTGCCGGGTCGCGCAGGCGCAACTCTTGGGTCTTCC  
GACCCACCGAAACACGATCGCTTGCCTGGGCTTATTCAGCACGCGTTCATGAAACGT  
AACCTGATGGCGTTGGAAGAGCCAATTCGCGACGTCGCGAAACAGGTTTTTCGCGCA  
AGTGAAAGGAGTAAAGGAGTTTGACTTTAAGGACGTATCTTCTCAGTTTACTGTCAA  
GGTTTTGATGGCCGCGTTGGGGCTGCCCATGGGAGAAGATGCACTGGTACCAGAGC  
ATGAAGTTCGCGAAAACGCAGTTCTGATGGTGCAATCGGACGCTCGCACTCGCGCG  
AAGGGACCTGAGCACATTGCGGCATACTGGATGCAAGACTACGCATCAAAAGT  
AATTGCTATGCGTCGCGCGAGCCCCAAAATGACCTGATTAGCAATTCGCGCTTGC  
CGAGATTGATGGAGATCGTTTGGATGATCGCGAGGTGTTACTGACTACAACCACGCT  
TATTATGGCCGGAGTGGAGAGCTTAGGTGGTTTTTCATGATGATGTTTCGCATACAATCT

GGCAACTTTCGACGAGGCCCGCCGTGCGGTGGTTGCGAATCCTGCGTTGTTGCCTGACGCGATCGAAGAGTCACTTCGTTTCAACACGTCGGCCCAACGCTTCCGTCGCCGCCTGATGAAAGATGTGACACTGCATGGCCAGACTATGAAGGAAGGTGATTTGTTTTGTCTGGCCTACGGTTCTGGGAACCGTGACGAGCGTCAATATCCCAACCCAGACGTTTATGACATTGCCCCGCAAGCCACGTGGGCATCTTGGCTTTGGAGGAGGTGTTTCATGCCTGTTTAGGCACAGCTATCGCACGCCTGGCGGTCAAGATCGCATTTGAAGAGTTTCACCAGGTAGTCCCCGATTACCGTCGCGTGGCCGATCAGTTGCCGTGGATGCCCTCCTCCACCTCCGTTACCTTTGGTGCTTCAGTTGAAAGCCCAGTAG

Codon optimized DNA sequence of P450-T2-5 for expression in *S. albus*

ATGGGGCTCGGCTCGTTCCACTTCGACCCCTACTCGCCCGCGATCGACGCGGACCCC  
TTCCCGTCCTACAAGCGGCTGCGCGACGAATCCCTGCTTCTGGTCCGAAGAAGCC  
CAGATGTGGATCCTCTCGCGGTACAGCGACATCGTGACCGCCGGCCAGGACTGGCA  
GACCTACTCCTCCGCCAGCGGCAACCTCATGACGGAACCTCGACGGGCGCGCGGGGG  
CGACCCTCGGGTCCTCGGACCCCCCGAAGCACGACCGGCTGCGCGGCCTGATCCAG  
CACGCCTTCATGAAGCGCAACCTGATGGCGCTCGAGGAGCCGATCCGCGACGTGGC  
CAAGCAGGTGTTTCGCCAGGTGAAGGGGGTCAAGGAATTCGACTTCAAGGACGTCT  
CGAGCCAGTTCACCGTGAAGGTGCTGATGGCCGCGCTCGGCCTGCCGATGGGCGAG  
GACGCGCTCGTCCCGGAACACGAAGTGCGGGAAAACGCCGTCTCATGGTCCAGTC  
GGACGCGCGCACCCGGGCCAAGGGGCCCGAGCACATCGCCGCGTACAACCTGGATGC  
AGGACTACGCCTCGAAGGTCATCGCCATGCGCCGCGCGTCCCCGCAGAACGACCTG  
ATCTCGAACTTCGCCCTCGCCGAGATCGACGGCGACCGCCTCGACGACCGGGAAGT  
GCTGCTGACCACGACCACCCTGATCATGGCGGGGGTTCGAGGTCCTCGGGGGCTTCAT  
GATGATGTTTCGCGTACAACCTCGCGACCTTCGACGAAGCGCGGGCGCGCCGTCGTCGC  
GAACCCGGCGCTGCTGCCCCGACGCCATCGAGGAATCCCTGCGTTCAACACCTCCGC  
CCAGCGGTTCCGGCGCCGCCTGATGAAGGACGTCACGCTGCACGGGCAGACCATGA  
AGGAAGGCGACTTCGTGTGCCTGGCCTACGGGAGCGGGAACCGGGACGAACGGCA  
GTACCCCAACCCCGACGTGTACGACATCGCGCGGAAGCCCCGGGGGCACCTGGGGC  
ACGGGGGTGGTGTCCACGCGTGCCTGGGTACGGCCATCGCCCGGCTGGCCGTCAAG  
ATCGCGTTCGAAGAATTCCACCAGGTGGTCCCGGACTACCGGCGCGTCGCGGACCA

GCTCCCGTGGATGCCGTCCAGCGAGTTCCGGAGCCCCCTCGTCCTCCAGCTCAAGGC  
GCAGTGA



1 **Synthesis of authentic standards for the product (aza-sty, 1, 2, 3, 4 compounds correspond**  
2 **to P1, P2, P3, P4 in the manuscript) of the reaction of azaserine with styrene:**

3 Unless stated otherwise, all chemicals, salts, and solvents were obtained from commercial  
4 suppliers (e.g. Sigma-Aldrich, Ambeed, Strem Chemicals) and used without further purification.  
5 Ethyl diazoacetate was purchased from Sigma-Aldrich as an 87 wt% solution in DCM and was  
6 used without further purification. Tetrahydrofuran and dichloromethane were purified by passage  
7 through a solvent column comprised of activated alumina, degassed over a copper column, and  
8 stored over activated 4Å molecular sieves under an atmosphere of nitrogen for 24 h before use.  
9 All air- and moisture-sensitive manipulations were conducted using standard Schlenk techniques  
10 under an atmosphere of nitrogen. Solvents and solutions were transferred using air-tight syringes.  
11 All flame-dried vessels were placed under vacuum and externally heated using a propane flame.  
12 All reactions were performed in flame-dried glassware under an atmosphere of nitrogen and were  
13 stirred using Teflon-coated magnetic stirring bars unless otherwise stated. Reactions were  
14 monitored by thin layer chromatography (TLC) on Kieselgel 60 F254 glass plates precoated with  
15 0.25 mm thickness of silica gel and visualized by UV irradiation. Flash column chromatography  
16 was conducted with a Teledyne Isco CombiFlash R<sub>f</sub> 200 System using SiliCycle SiliaSep Premium  
17 25 µm columns.

18 Nuclear magnetic resonance (NMR) spectra were acquired on a Bruker NEO at 500 MHz  
19 for <sup>1</sup>H and 126 MHz for <sup>13</sup>C or on a Bruker AV-600 at 600 MHz for <sup>1</sup>H and 151 MHz for <sup>13</sup>C at  
20 the NMR facility of the College of Chemistry, University of California, Berkeley. Chemical shifts  
21 were reported in ppm downfield of TMS and were referenced to residual solvent signal (<sup>1</sup>H-NMR:  
22 CDCl<sub>3</sub> δ = 7.76 ppm, CD<sub>3</sub>C(O)OD = 2.03 ppm, CD<sub>3</sub>OD = 3.31 ppm; <sup>13</sup>C-NMR: CDCl<sub>3</sub> δ = 77.16  
23 ppm, CD<sub>3</sub>C(O)OD = 20.00 ppm, CD<sub>3</sub>OD = 49.00 ppm). NMR Spectra are reported as follows:  
24 chemical shift (multiplicity, coupling constants where applicable, number of nuclei). Splitting is  
25 reported with the following symbols: s = singlet, d = doublet, t = triplet, q = quartet, dd = doublet  
26 of doublets, dt = doublet of triplets, td = triplet of doublets, m = multiplet. Coupling constants are  
27 reported in Hz. High resolution mass spectrometry (HRMS) was performed on a Perkin Elmer  
28 axION ESI TOF at the LBNL Catalysis Laboratory, University of California, Berkeley. HRMS  
29 data only provided for newly reported compounds. Optical rotation was measured on a Perkin-  
30 Elmer 241 Automatic Polarimeter. Sample concentration for polarimetry is given in c = g/mL.  
31 Fourier Transform Infrared (FTIR) spectrometry was performed on a Bruker Vertex80 Time-

32 Resolved FTIR at the LBNL Catalysis Laboratory, University of California, Berkeley. FTIR  
33 spectra are reported as follows: transmission wavenumber ( $\text{cm}^{-1}$ ), relative intensity, and  
34 characteristic bond (e.g. C=O). Relative transmission intensity is reported with the following  
35 symbols: br = broad, s = strong, vs = very strong. Only selected resonances are reported. High  
36 Performance Liquid Chromatography Mass Spectroscopy (HPLC-MS) analyses were performed  
37 on either an Agilent 1260 infinity ii with mass selective detector iQ (MSD iQ) or Agilent 6545  
38 with quadrupole time-of-flight (Q-TOF) with a MilliporeSigma Astec CYCLOBOND I 2000 HP-  
39 RSP Chiral HPLC (5  $\mu\text{m}$ , 25 cm x 4.6 mm) analytical column. The mobile phase consisted of 10  
40 mM ammonium formate in water with 50  $\mu\text{L}$  formic acid added per liter (solvent A) and 0.1%  
41 (v/v) formic acid in acetonitrile (solvent B), and separations were performed as follows: held at  
42 14% B from 0 min to 32 min. The flow rate was held at 0.35 mL/min from 0 min to 23 min,  
43 increased to 0.8 mL/min in 0.2 min, held at 0.8 mL/min from 23.2 min to 32 min. Retention time  
44 ( $T_r$ ) is reported as detection time (in minutes) after sample injection.

45

46 **Synthesis of cis-ethyl-2-phenylcyclopropane-1-carboxylate (S1) and trans-ethyl-2-phenyl-**  
47 **cyclopropane-1-carboxylate (S2)**

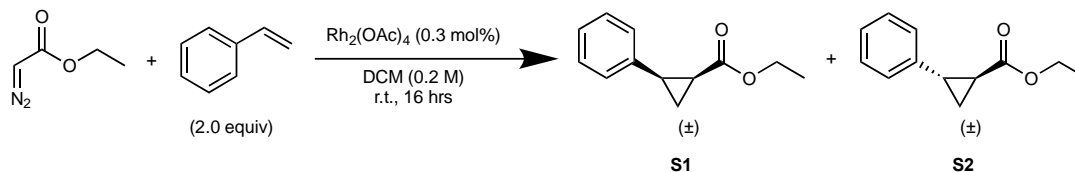

48

49 To a flame-dried, 500-mL round-bottom flask with magnetic stirring bar was added  
50  $\text{Rh}_2(\text{OAc})_4$  (134 mg, 0.303 mmol, 0.3 mol%). The flask was placed under vacuum and backfilled  
51 with nitrogen three times before 400 mL of dry, degassed dichloromethane (0.25 M) was added,  
52 producing a light-green suspension of catalyst. The flask was then flushed with nitrogen for 10  
53 min under constant stirring. Styrene (22.9 mL, 200 mmol, 2.00 equiv) was added to the reaction  
54 flask and allowed to stir for 10 min at room temperature. Ethyl diazoacetate (12.1 mL, 100 mmol,  
55 1.00 equiv) was then slowly added (0.80 mL per hour) over 15 h at room temperature under  
56 nitrogen using a syringe pump. Once all ethyl diazoacetate had been added, the reaction was  
57 allowed to stir under nitrogen for an additional 1 h, during which the reaction maintained a  
58 consistent heterogenous blue-green color. The reaction mixture was concentrated to approximately  
59 200 mL under reduced pressure and filtered through silica gel with 100 mL of dichloromethane,  
60 giving a yellow-brown solution. This solution was then concentrated under reduced pressure to a

61 viscous, yellow oil. The crude residue was purified by flash column chromatography (gradient  
62 0%→10% diethyl ether:hexanes) to yield **S1** (5.83 g, 30.7 mmol, 31% yield) as a colorless oil and  
63 **S2** (9.00 g, 47.3 mmol, 47% yield) as a colorless, crystalline solid.

64

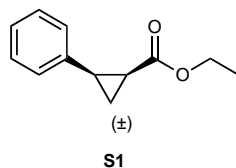

65

66 Data for cis-ethyl-2-phenylcyclopropane-1-carboxylate (**S1**)

67 <sup>1</sup>H NMR (500 MHz, CDCl<sub>3</sub>) δ 7.29 – 7.22 (m, 4H), 7.18 (ddt, *J* = 8.6, 5.6, 2.9 Hz, 1H), 3.86 (q, *J*  
68 = 7.1 Hz, 2H), 2.57 (td, *J* = 9.0, 7.5 Hz, 1H), 2.07 (ddd, *J* = 9.3, 7.8, 5.6 Hz, 1H), 1.77 – 1.65 (m,  
69 1H), 1.31 (td, *J* = 8.2, 5.0 Hz, 1H), 0.96 (t, *J* = 7.1 Hz, 3H).

70 <sup>13</sup>C NMR (126 MHz, CDCl<sub>3</sub>) δ 171.09, 136.69, 129.42, 127.99, 126.75, 60.28, 25.58, 21.92,  
71 14.13, 11.22.

72 FTIR (neat, cm<sup>-1</sup>) *ν*<sub>max</sub>: 1722 vs (C=O), 1175 vs (C–O)

73 *R*<sub>f</sub> (10:90 ethyl acetate:hexanes): 0.40

74 <sup>1</sup>H-NMR and <sup>13</sup>C-NMR of **S1** were consistent with those reported previously<sup>69</sup>.

75

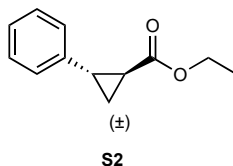

76

77 Data for trans-ethyl-2-phenylcyclopropane-1-carboxylate (**S2**)

78 <sup>1</sup>H NMR (500 MHz, CDCl<sub>3</sub>) δ 7.26 (dd, *J* = 8.4, 6.8 Hz, 2H), 7.21 – 7.15 (m, 1H), 7.12 – 7.04 (m,  
79 2H), 4.16 (q, *J* = 7.1 Hz, 2H), 2.51 (ddd, *J* = 9.2, 6.5, 4.1 Hz, 1H), 1.89 (ddd, *J* = 8.3, 5.3, 4.1 Hz,  
80 1H), 1.59 (dt, *J* = 9.5, 4.9 Hz, 1H), 1.40 – 1.15 (m, 4H).

81 <sup>13</sup>C NMR (126 MHz, CDCl<sub>3</sub>) δ 173.47, 140.21, 128.55, 126.55, 126.24, 60.77, 26.25, 24.27,  
82 17.14, 14.36.

83 FTIR (neat, cm<sup>-1</sup>) *ν*<sub>max</sub>: 1714 vs (C=O), 1175 vs (C–O)

84 *R*<sub>f</sub> (10:90 ethyl acetate:hexanes): 0.44

85 <sup>1</sup>H-NMR and <sup>13</sup>C-NMR of **S2** were consistent with those reported previously<sup>70</sup>.

86

87 **Synthesis of cis-2-phenylcyclopropane-1-carboxylic acid (S3)**

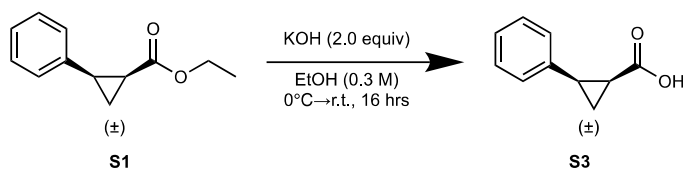

88

89 To a 50-mL, round-bottom flask with magnetic stirring bar under an atmosphere of air was

90 added potassium hydroxide (1.12 g, 20.0 mmol, 2.00 equiv). This material was dissolved in 23 mL

91 of absolute ethanol (final reaction concentration of 0.30 M) at room temperature under vigorous

92 stirring. Once the KOH had fully dissolved, the cloudy solution was cooled to 0 °C in an ice-water

93 bath for 15 min. **S1** (1.90 g, 10.0 mmol, 1.00 equiv) was dissolved in 7 mL of absolute ethanol and

94 was slowly added to the stirring ethanolic solution of KOH over 10 min. The reaction was allowed

95 to warm to room temperature overnight, during which time it turned light-orange. The reaction

96 mixture was diluted with diH<sub>2</sub>O and transferred to a separatory funnel. The aqueous solution was

97 extracted three times with dichloromethane to remove uncharged impurities. The organic fractions

98 were combined and back-extracted with 0.5 M NaOH; the organic fractions were discarded. The

99 aqueous layers were combined and acidified to pH 1 with 6 N HCl, producing a cloudy, white

100 suspension. This suspension was extracted 5 times with dichloromethane. The organic fractions

101 were combined and sequentially washed with 1 N HCl and brine, dried over MgSO<sub>4</sub>, and

102 concentrated under reduced pressure to yield a light-orange residue. This residue was recrystallized

103 from boiling pentanes to give **S3** (1.48 g, 9.14 mmol, 91% yield) as off-white needles.

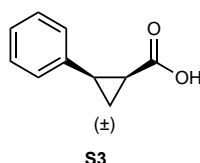

105

106 Data for cis-2-phenylcyclopropane-1-carboxylic acid (**S3**)

107 **<sup>1</sup>H NMR** (500 MHz, CDCl<sub>3</sub>) δ 7.30 – 7.20 (m, 5H), 2.65 (q, *J* = 8.6 Hz, 1H), 2.05 (ddd, *J* = 9.2,

108 7.7, 5.6 Hz, 1H), 1.68 (dt, *J* = 7.7, 5.3 Hz, 1H), 1.39 (ddd, *J* = 8.7, 7.7, 5.0 Hz, 1H).

109 **<sup>13</sup>C NMR** (126 MHz, CDCl<sub>3</sub>) δ 177.00, 136.01, 129.39, 128.08, 126.91, 26.70, 21.48, 12.18.

110 **FTIR** (neat, cm<sup>-1</sup>) *ν*<sub>max</sub>: 2936 br (O–H), 1688 vs (C=O), 1446 s (O–H)

111 **R<sub>f</sub>** (20:80 ethyl acetate:hexanes): 0.17

112 <sup>1</sup>H-NMR and <sup>13</sup>C-NMR of **S3** were consistent with those reported previously<sup>71</sup>.

113 **Synthesis of trans-2-phenylcyclopropane-1-carboxylic acid (S4)**

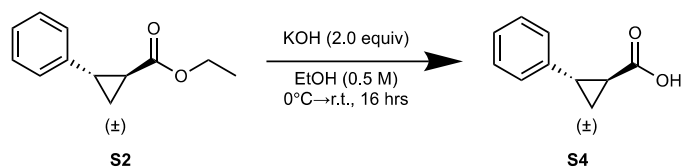

114  
 115 To a 100-mL, round-bottom flask with magnetic stirring bar under an atmosphere of air was  
 116 added potassium hydroxide (4.49 g, 80.0 mmol, 2.00 equiv). This material was dissolved in 60 mL  
 117 of absolute ethanol (final reaction concentration of 0.50 M) at room temperature under vigorous  
 118 stirring. Once the KOH had fully dissolved, the cloudy solution was cooled to 0 °C in an ice-water  
 119 bath for 15 min. **S2** (1.90 g, 10.0 mmol, 1.00 equiv) was dissolved in 20 mL of absolute ethanol  
 120 and was slowly added to the stirring ethanolic solution of KOH over 10 min. The reaction was  
 121 allowed to warm to room temperature overnight, during which time it became light yellow  
 122 alongside formation of a white precipitate. The reaction mixture was diluted with diH<sub>2</sub>O,  
 123 dissolving the precipitate, and transferred to a separatory funnel. The aqueous solution was  
 124 extracted three times with dichloromethane to remove uncharged impurities. The organic fractions  
 125 were combined and back-extracted with 0.5 M NaOH; the organic fractions were discarded. The  
 126 aqueous layers were combined and acidified to pH 1 with 6 N HCl, producing a cloudy, white  
 127 suspension. This suspension was extracted 5 times with dichloromethane. The organic fractions  
 128 were combined and sequentially washed with 1 N HCl and brine, dried over MgSO<sub>4</sub>, and  
 129 concentrated under reduced pressure to yield a yellow residue. This residue was recrystallized from  
 130 boiling pentanes to give **S4** (5.38 g, 33.2 mmol, 83% yield) as a light-yellow crystalline solid.

131

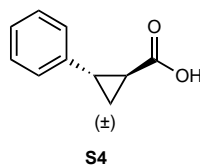

132

133 Data for trans-2-phenylcyclopropane-1-carboxylic acid (**S4**)

134 <sup>1</sup>H NMR (500 MHz, CDCl<sub>3</sub>) δ 11.81 (s, 1H), 7.26 (t, *J* = 7.6 Hz, 2H), 7.21 – 7.16 (m, 1H), 7.08  
 135 (dd, *J* = 7.3, 1.8 Hz, 2H), 2.58 (ddd, *J* = 9.3, 6.7, 4.1 Hz, 1H), 1.88 (ddd, *J* = 8.8, 5.2, 4.0 Hz, 1H),  
 136 1.64 (dt, *J* = 9.6, 4.9 Hz, 1H), 1.38 (ddd, *J* = 8.4, 6.7, 4.6 Hz, 1H).

137 <sup>13</sup>C NMR (126 MHz, CDCl<sub>3</sub>) δ 180.18, 139.62, 128.67, 126.84, 126.41, 27.25, 24.14, 17.65.

138 FTIR (neat, cm<sup>-1</sup>) *ν*<sub>max</sub>: 2938 br (O–H), 1687 vs (C=O), 1446 s (O–H)

139 **R<sub>f</sub>** (20:80 ethyl acetate:hexanes): 0.16

140 <sup>1</sup>H-NMR and <sup>13</sup>C-NMR of **S4** were consistent with those reported previously<sup>71</sup>.

141

142 **Synthesis of (S)-4-benzyl-3-((1R,2S)-2-phenylcyclopropane-1-carbonyl)oxazolidin-2-one**

143 **(S5) and (S)-4-benzyl-3-((1S,2R)-2-phenylcyclopropane-1-carbonyl)oxazolidin-2-one (S6)**

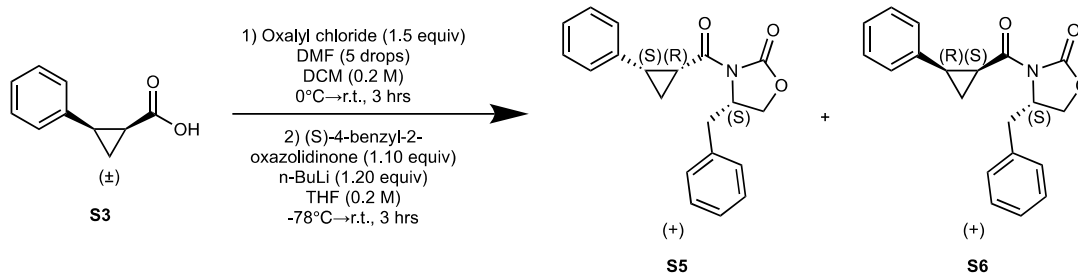

145 To a flame-dried, 50-mL round-bottom flask containing a magnetic stirring bar were added  
146 **S3** (1.30 g, 8.00 mmol, 1.00 equiv) and 40 mL of dry, degassed dichloromethane (0.20 M). This  
147 flask was flushed with nitrogen for 10 min under constant stirring, at which time the solution was  
148 cooled to 0 °C in an ice-water bath for 15 min. Once cooled, 5 drops of dimethylformamide were  
149 added, and the solution was allowed to stir for a further 5 min at 0 °C under an atmosphere of  
150 nitrogen. Oxalyl chloride (1.03 mL, 12.0 mmol, 1.50 equiv) was slowly added dropwise to the  
151 stirring reaction mixture over the course of 10 min, resulting in the yellowing of the reaction  
152 mixture and evolution of gas. This reaction was allowed to warm to room temperature over 3 h  
153 while stirring. The solution of acyl chloride was concentrated under reduced pressure and dried  
154 under vacuum to give an orange oil. The crude acyl chloride was dissolved in 10 mL of dry,  
155 degassed tetrahydrofuran.

156 To a flame-dried, 100-mL round-bottom flask equipped with magnetic stirring bar were  
157 added (S)-4-benzyl-2-oxazolidine (1.56 g, 8.80 mmol, 1.10 equiv) and 30 mL of dry, degassed  
158 tetrahydrofuran (final reaction concentration of 0.20 M). This solution was flushed with nitrogen  
159 for 10 min under constant stirring at room temperature, at which time the solution was cooled to -  
160 78 °C in a dry ice/acetone bath for 20 min. A 2.5 M solution of n-butyl lithium in hexanes (3.84  
161 mL, 9.60 mmol, 1.20 equiv) was added dropwise over 10 min, generating a white precipitate. This  
162 reaction mixture was allowed to warm to room temperature under nitrogen over 1 h before cooling  
163 the reaction mixture to -78 °C in a dry ice/acetone bath for 20 min. Simultaneously, the solution  
164 of acyl chloride in THF was cooled to -78 °C in a dry ice/acetone bath under an atmosphere of  
165 nitrogen for 20 min. Once cooled, the solution of acyl chloride was added slowly to the stirring

166 solution of lithiated oxazolidinone over the course of 5 min, during which time the reaction became  
167 light yellow/orange. The reaction mixture was allowed to stir at -78 °C under an atmosphere of  
168 nitrogen for 1 h before warming to room temperature over an additional 1 h. The reaction was  
169 quenched with the addition of 20 mL of diH<sub>2</sub>O, and the resulting mixture was allowed to stir for  
170 10 min. This mixture was transferred to a separatory funnel and extracted 5 times with  
171 dichloromethane. The organic layers were combined and sequentially washed with 1 N NaOH, 1  
172 N HCl, diH<sub>2</sub>O, and brine. The organic layer then was dried over MgSO<sub>4</sub> and concentrated to a  
173 light-brown solid. The residue was purified by column chromatography (5%→15% ethyl  
174 acetate:hexanes) to give **S5** (1.04 g, 3.22 mmol, 81% yield with respect to starting enantiomer of  
175 **S3**) as a granular, colorless solid, and **S6** (1.11 g, 3.44 mmol, 86% yield with respect to starting  
176 enantiomer of **S3**) as a colorless, crystalline solid.  
177

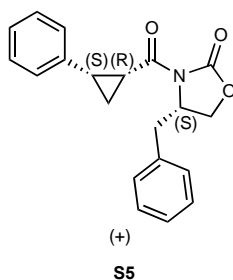

178  
179 Data for (*S*)-4-benzyl-3-((1*R*,2*S*)-2-phenylcyclopropane-1-carbonyl)oxazolidin-2-one (**S5**)  
180 <sup>1</sup>H NMR (500 MHz, CDCl<sub>3</sub>) δ 7.35 – 7.21 (m, 7H), 7.20 – 7.14 (m, 1H), 7.00 – 6.94 (m, 2H), 4.51  
181 – 4.38 (m, 1H), 4.18 – 4.08 (m, 1H), 4.04 (dd, *J* = 9.1, 2.3 Hz, 1H), 3.36 (ddd, *J* = 9.8, 7.3, 5.9 Hz,  
182 1H), 2.90 (dt, *J* = 9.7, 7.8 Hz, 1H), 2.51 (dd, *J* = 13.5, 3.3 Hz, 1H), 2.15 – 2.02 (m, 2H), 1.45 (ddd,  
183 *J* = 8.4, 7.3, 5.2 Hz, 1H).  
184 <sup>13</sup>C NMR (126 MHz, CDCl<sub>3</sub>) δ 169.17, 153.68, 135.92, 135.66, 129.37, 129.19, 128.89, 128.08,  
185 127.17, 126.92, 66.02, 55.47, 37.28, 27.15, 24.19, 10.33.  
186 FTIR (neat, cm<sup>-1</sup>) ν<sub>max</sub>: 1769 vs (C=O), 1687 vs (C=O)  
187 HRMS (ESI): *m/z* for C<sub>20</sub>H<sub>19</sub>NNaO<sub>3</sub><sup>+</sup> [M+Na]<sup>+</sup> calcd.: 344.1257, found: 344.1268.  
188 [α]<sub>D</sub><sup>25</sup> = +152 degrees (c = 0.010, CHCl<sub>3</sub>)  
189 R<sub>f</sub> (20:80 ethyl acetate:hexanes): 0.28  
190

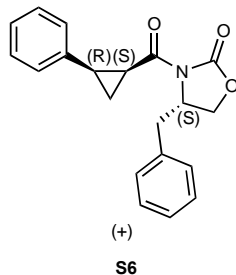

191  
 192 Data of (*S*)-4-benzyl-3-((1*S*,2*R*)-2-phenylcyclopropane-1-carbonyl)oxazolidin-2-one (**S6**)  
 193 **<sup>1</sup>H NMR** (500 MHz, CDCl<sub>3</sub>) δ 7.34 – 7.17 (m, 8H), 7.17 – 7.08 (m, 2H), 4.31 (ddt, *J* = 9.5, 7.9,  
 194 3.3 Hz, 1H), 4.03 (dd, *J* = 9.0, 3.1 Hz, 1H), 3.92 (t, *J* = 8.5 Hz, 1H), 3.40 (ddd, *J* = 9.6, 7.5, 5.9  
 195 Hz, 1H), 3.19 (dd, *J* = 13.4, 3.5 Hz, 1H), 2.81 (q, *J* = 8.4 Hz, 1H), 2.70 (dd, *J* = 13.4, 9.6 Hz, 1H),  
 196 2.02 (dt, *J* = 7.4, 5.5 Hz, 1H), 1.47 (td, *J* = 8.0, 5.1 Hz, 1H).  
 197 **<sup>13</sup>C NMR** (126 MHz, CDCl<sub>3</sub>) δ 169.51, 153.80, 136.18, 135.33, 129.51, 128.97, 128.95, 128.16,  
 198 127.34, 126.84, 65.99, 55.06, 37.97, 27.23, 23.83, 11.18.  
 199 **FTIR** (neat, cm<sup>-1</sup>) *ν*<sub>max</sub>: 1771 vs (C=O), 1685 vs (C=O)  
 200 **HRMS** (ESI): *m/z* for C<sub>20</sub>H<sub>19</sub>NNaO<sub>3</sub><sup>+</sup> [M+Na]<sup>+</sup> calcd.: 344.1257, found: 344.1249.  
 201 **[α]<sub>D</sub><sup>25</sup>** = +14.3 degrees (c = 0.014, CHCl<sub>3</sub>)  
 202 **R<sub>f</sub>** (20:80 ethyl acetate:hexanes): 0.49  
 203  
 204 **Synthesis of (*S*)-4-benzyl-3-((1*R*,2*R*)-2-phenylcyclopropane-1-carbonyl)oxazolidin-2-one**  
 205 **(*S7*) and (*S*)-4-benzyl-3-((1*S*,2*S*)-2-phenylcyclopropane-1-carbonyl)oxazolidin-2-one (*S8*)**

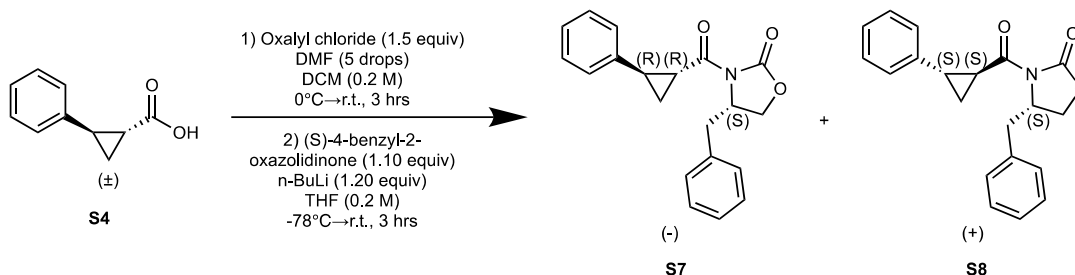

206  
 207 To a flame-dried, 100-mL round-bottom flask containing a magnetic stirring bar were  
 208 added **S4** (2.17 g, 13.4 mmol, 1.00 equiv) and 70 mL of dry, degassed dichloromethane (0.2 M).  
 209 This flask was flushed with nitrogen for 10 min under constant stirring, at which time the solution  
 210 was cooled to 0 °C in an ice-water bath for 15 min. Once cooled, 10 drops of dimethylformamide  
 211 were added, and the solution was allowed to stir for a further 5 min at 0 °C under an atmosphere  
 212 of nitrogen. Oxalyl chloride (1.73 mL, 20.1 mmol, 1.50 equiv) was slowly added dropwise to the



213 stirring reaction mixture over the course of 10 min, resulting in the yellowing of the reaction  
214 mixture and evolution of gas. This reaction was allowed to warm to room temperature over 3 h  
215 while stirring. The solution of acyl chloride was concentrated under reduced pressure and dried  
216 under vacuum to give a dark-red oil. The crude acyl chloride was dissolved in 15 mL of dry,  
217 degassed tetrahydrofuran.

218 To a flame-dried, 100-mL round-bottom flask equipped with magnetic stirring bar were  
219 added (S)-4-benzyl-2-oxazolidine (2.60 g, 14.7 mmol, 1.10 equiv) and 50 mL of dry, degassed  
220 tetrahydrofuran (final reaction concentration of 0.2 M). This solution was flushed with nitrogen  
221 for 10 min under constant stirring at room temperature, at which time the solution was cooled to -  
222 78 °C in a dry ice/acetone bath for 20 min. A 2.5 M solution of n-butyl lithium in hexanes (6.43  
223 mL, 16.1 mmol, 1.20 equiv) was added dropwise over 10 min, generating a white precipitate. This  
224 reaction mixture was allowed to warm to room temperature under nitrogen over 1 h before cooling  
225 the reaction mixture to -78 °C in a dry ice/acetone bath for 20 min. Simultaneously, the solution  
226 of acyl chloride in THF was cooled to -78 °C in a dry ice/acetone bath under an atmosphere of  
227 nitrogen for 20 min. Once cooled, the solution of acyl chloride was added slowly to the stirring  
228 solution of lithiated oxazolidinone over the course of 5 min, during which time the reaction became  
229 red/orange in color. The reaction mixture was allowed to stir at -78 °C under an atmosphere of  
230 nitrogen for 1 h before warming to room temperature over an additional 1 h. The reaction was  
231 quenched with the addition of 30 mL of diH<sub>2</sub>O, and the resulting mixture was allowed to stir for  
232 10 min. This mixture was transferred to a separatory funnel and extracted 5 times with  
233 dichloromethane. The organic layers were combined and sequentially washed with 1 N NaOH, 1  
234 N HCl, diH<sub>2</sub>O, and brine. The organic layer then was dried over MgSO<sub>4</sub> and concentrated to a  
235 light-brown solid. The residue was purified by column chromatography (5%→20% ethyl  
236 acetate:hexanes) to give **S7** (2.02 g, 6.30 mmol, 94% yield with respect to starting enantiomer of  
237 **S4**) as a colorless, fibrous solid and **S8** (1.63 g, 5.08 mmol, 76% yield with respect to starting  
238 enantiomer of **S4**) as a colorless, needle-like solid.

239

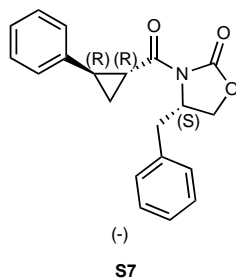

240  
 241 Data of (*S*)-4-benzyl-3-((1*R*,2*R*)-2-phenylcyclopropane-1-carbonyl)oxazolidin-2-one (**S7**)  
 242 **<sup>1</sup>H NMR** (500 MHz, CDCl<sub>3</sub>) δ 7.38 – 7.22 (m, 10H), 4.75 (ddt, *J* = 9.4, 7.7, 3.2 Hz, 1H), 4.30 –  
 243 4.15 (m, 2H), 3.62 (ddd, *J* = 8.3, 5.2, 4.2 Hz, 1H), 3.33 (dd, *J* = 13.4, 3.5 Hz, 1H), 2.84 (dd, *J* =  
 244 13.4, 9.5 Hz, 1H), 2.77 (ddd, *J* = 9.3, 6.6, 4.1 Hz, 1H), 1.81 (ddd, *J* = 9.3, 5.2, 4.1 Hz, 1H), 1.48  
 245 (ddd, *J* = 8.3, 6.6, 4.1 Hz, 1H).  
 246 **<sup>13</sup>C NMR** (126 MHz, CDCl<sub>3</sub>) δ 172.78, 153.89, 139.82, 135.42, 129.55, 129.06, 128.63, 127.44,  
 247 126.78, 126.68, 66.20, 55.60, 38.16, 29.10, 23.09, 19.26.  
 248 **FTIR** (neat, cm<sup>-1</sup>) *ν*<sub>max</sub>: 1781 vs (C=O), 1674 vs (C=O)  
 249 **HRMS** (ESI): *m/z* for C<sub>20</sub>H<sub>19</sub>NNaO<sub>3</sub><sup>+</sup> [M+Na]<sup>+</sup> calcd.: 344.1257, found: 344.1244.  
 250 **[α]<sub>D</sub><sup>25</sup>** = -156 degrees (c = 0.011, CHCl<sub>3</sub>)  
 251 **R<sub>f</sub>** (20:80 ethyl acetate:hexanes): 0.37  
 252

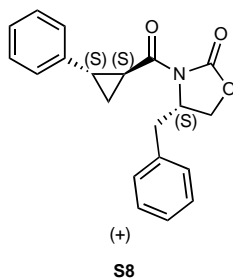

253  
 254 Data of (*S*)-4-benzyl-3-((1*S*,2*S*)-2-phenylcyclopropane-1-carbonyl)oxazolidin-2-one (**S7**)  
 255 **<sup>1</sup>H NMR** (500 MHz, CDCl<sub>3</sub>) δ 7.46 – 7.17 (m, 10H), 4.74 (ddt, *J* = 10.3, 6.8, 3.3 Hz, 1H), 4.29 –  
 256 4.13 (m, 2H), 3.63 (ddd, *J* = 8.1, 5.2, 4.1 Hz, 1H), 3.37 (dd, *J* = 13.4, 3.4 Hz, 1H), 2.85 (dd, *J* =  
 257 13.4, 9.6 Hz, 1H), 2.75 (ddd, *J* = 9.2, 6.6, 4.2 Hz, 1H), 1.86 (ddd, *J* = 9.3, 5.3, 4.1 Hz, 1H), 1.55  
 258 (ddd, *J* = 8.3, 6.6, 4.1 Hz, 1H).  
 259 **<sup>13</sup>C NMR** (126 MHz, CDCl<sub>3</sub>) δ 172.75, 153.91, 139.78, 135.48, 129.56, 129.08, 128.61, 127.46,  
 260 126.77, 126.60, 66.18, 55.81, 38.10, 28.99, 23.11, 19.42.  
 261 **FTIR** (neat, cm<sup>-1</sup>) *ν*<sub>max</sub>: vs 1758 (C=O), 1673 vs (C=O)

262 **HRMS** (ESI):  $m/z$  for  $C_{20}H_{20}NO_3^+$   $[M+H]^+$  calcd.: 322.1438, found: 322.1424.

263  $[\alpha]_D^{25} = +302$  degrees ( $c = 0.011$ ,  $CHCl_3$ )

264 **R<sub>f</sub>** (20:80 ethyl acetate:hexanes): 0.46

265

266 **Synthesis of (1*R*,2*S*)-2-phenylcyclopropane-1-carboxylic acid (S9)**

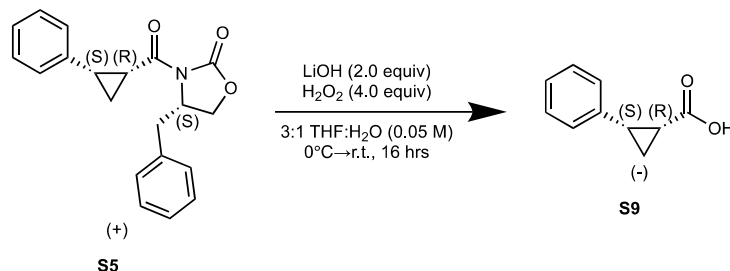

267

268 Procedure modified from Evans *et al*<sup>72</sup>. To a 50-mL, round-bottom flask containing a  
269 magnetic stirring bar under an atmosphere of air were added **S5** (0.579 g, 1.80 mmol, 1.0 equiv)  
270 and 36 mL of 3:1 THF:H<sub>2</sub>O (0.05 M). This solution was allowed to stir at room temperature for 5  
271 min before 30% H<sub>2</sub>O<sub>2</sub> (0.735 mL, 7.20 mmol, 4.0 equiv) was added. LiOH (86.2 mg, 3.60 mmol,  
272 2.0 equiv) was then added to the reaction mixture as one portion and allowed to stir at room  
273 temperature for 16 h. Sodium sulfite (998 mg, 7.92 mmol, 4.4 equiv) was dissolved in 5 mL of  
274 diH<sub>2</sub>O and added to the reaction mixture. The resulting solution was allowed to stir at room  
275 temperature for an additional 10 min. The reaction mixture was transferred to a separatory funnel,  
276 10 mL of 1 N NaOH was added, and the aqueous layer was extracted with dichloromethane twice  
277 to remove neutral organic products. The organic layers were combined and back-extracted with  
278 0.5 N NaOH twice; the organic fraction was then discarded. The aqueous fractions were combined,  
279 acidified to pH 1 with 6 N HCl, producing a cloudy, white suspension, and extracted 5 times with  
280 dichloromethane. The organic fractions were combined and washed with 1 N HCl and brine, then  
281 dried over MgSO<sub>4</sub> and concentrated under reduced pressure to give a colorless solid. This residue  
282 was recrystallized from boiling pentanes to give **S9** (0.249 g, 1.54 mmol, 85% yield) as a fibrous,  
283 colorless solid.

284

285

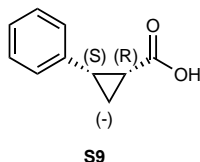

286

287 Data for (1*R*,2*S*)-2-phenylcyclopropane-1-carboxylic acid (**S9**)

288 <sup>1</sup>H NMR (500 MHz, CDCl<sub>3</sub>) δ 11.04 (s, 1H), 7.32 – 7.20 (m, 5H), 2.64 (q, *J* = 8.6 Hz, 1H), 2.05  
 289 (ddd, *J* = 9.3, 7.7, 5.6 Hz, 1H), 1.68 (dt, *J* = 7.8, 5.4 Hz, 1H), 1.38 (ddd, *J* = 8.7, 7.7, 5.0 Hz, 1H).

290 <sup>13</sup>C NMR (500 MHz, CDCl<sub>3</sub>) δ 177.47, 136.02, 129.37, 128.05, 126.87, 26.68, 21.54, 12.16.

291 FTIR (neat, cm<sup>-1</sup>) ν<sub>max</sub>: 2939 br (O–H), 1684 vs (C=O), 1442 s (O–H)

292 [α]<sub>D</sub><sup>25</sup> = -30.0 degrees (c = 0.010, CHCl<sub>3</sub>)

293 R<sub>f</sub> (20:80 ethyl acetate:hexanes): 0.17

294 <sup>1</sup>H-NMR and <sup>13</sup>C-NMR, and [α]<sub>D</sub><sup>25</sup> of **S9** were consistent with those reported previously<sup>73</sup>.

295

296 **Synthesis of (1*S*,2*R*)-2-phenylcyclopropane-1-carboxylic acid (**S10**)**

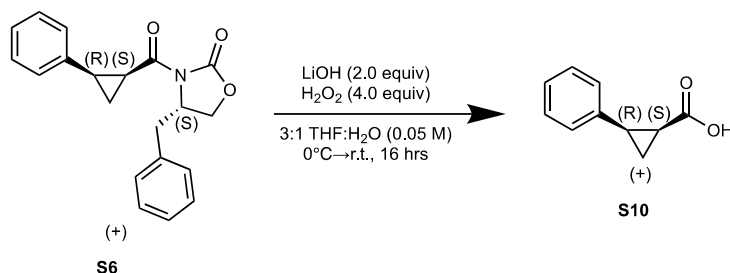

297

298 Procedure modified from Evans *et al*<sup>72</sup>. To a 50-mL, round-bottom flask containing a  
 299 magnetic stirring bar under an atmosphere of air were added **S6** (0.656 g, 2.04 mmol, 1.0 equiv)  
 300 and 41 mL of 3:1 THF:H<sub>2</sub>O (0.05 M). This solution was allowed to stir at room temperature for 5  
 301 min before 30% H<sub>2</sub>O<sub>2</sub> (0.833 mL, 8.17 mmol, 4.0 equiv) was added. LiOH (171 mg, 4.08 mmol,  
 302 2.0 equiv) was then added to the reaction mixture as one portion and allowed to stir at room  
 303 temperature for 16 h. Sodium sulfite (1.13 g, 8.98 mmol, 4.4 equiv) was dissolved in 10 mL of  
 304 diH<sub>2</sub>O and added to the reaction mixture. The resulting solution was allowed to stir at room  
 305 temperature for an additional 10 min. The reaction mixture was transferred to a separatory funnel,  
 306 10 mL of 1 N NaOH was added, and the aqueous layer was extracted with dichloromethane twice  
 307 to remove neutral organic products. The organic layers were combined and back-extracted with  
 308 0.5 N NaOH twice; the organic fraction was then discarded. The aqueous fractions were combined,  
 309 acidified to pH 1 with 6 N HCl, producing a cloudy, white suspension, and extracted 5 times with

310 dichloromethane. The organic fractions were combined and washed with 1 N HCl and brine, then  
311 dried over MgSO<sub>4</sub> and concentrated under reduced pressure to give a colorless solid. This residue  
312 was recrystallized from boiling pentanes to give **S10** (0.254 g, 1.56 mmol, 77% yield) as a fibrous,  
313 colorless solid.

314

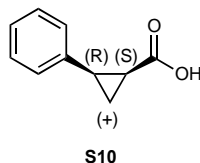

315

316 Data for (1*S*,2*R*)-2-phenylcyclopropane-1-carboxylic acid (**S10**)

317 <sup>1</sup>H NMR (500 MHz, CDCl<sub>3</sub>) δ 10.66 (s, 1H), 7.32 – 7.13 (m, 5H), 2.60 (q, *J* = 8.6 Hz, 1H), 2.01  
318 (ddd, *J* = 9.4, 7.7, 5.6 Hz, 1H), 1.64 (dt, *J* = 7.7, 5.3 Hz, 1H), 1.34 (ddd, *J* = 8.9, 7.7, 5.0 Hz, 1H).

319 <sup>13</sup>C NMR (500 MHz, CDCl<sub>3</sub>) δ 177.41, 136.03, 129.38, 128.06, 126.87, 26.68, 21.54, 12.16.

320 FTIR (neat, cm<sup>-1</sup>) *ν*<sub>max</sub>: 3026 br (O–H), 1683 vs (C=O), 1441 s (O–H)

321 [α]<sub>D</sub><sup>25</sup> = +28.7 degrees (c = 0.010, CHCl<sub>3</sub>)

322 *R*<sub>f</sub> (20:80 ethyl acetate:hexanes): 0.17

323 <sup>1</sup>H-NMR and <sup>13</sup>C-NMR, and [α]<sub>D</sub><sup>25</sup> of **S10** were consistent with those reported previously<sup>73</sup>.

324

325 **Synthesis of (1*R*,2*R*)-2-phenylcyclopropane-1-carboxylic acid (**S11**)**

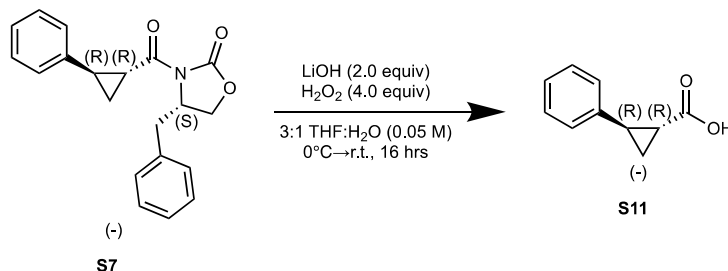

326

327 Procedure modified from Evans *et al*<sup>72</sup>. To a 100-mL, round-bottom flask containing a  
328 magnetic stirring bar under an atmosphere of air were added **S7** (1.01 g, 3.14 mmol, 1.0 equiv)  
329 and 60 mL of 3:1 THF:H<sub>2</sub>O (0.05 M). This solution was allowed to stir at room temperature for 5  
330 min before 30% H<sub>2</sub>O<sub>2</sub> (1.28 mL, 12.6 mmol, 4.0 equiv) was added. LiOH (264 mg, 6.28 mmol,  
331 2.0 equiv) was then added to the reaction mixture as one portion and allowed to stir at room  
332 temperature for 16 h. Sodium sulfite (1.74 g, 13.8 mmol, 4.4 equiv) was dissolved in 10 mL of  
333 diH<sub>2</sub>O and added to the reaction mixture. The resulting solution was allowed to stir at room

334 temperature for an additional 10 min. The reaction mixture was transferred to a separatory funnel,  
335 10 mL of 1 N NaOH was added, and the aqueous layer was extracted with dichloromethane twice  
336 to remove neutral organic products. The organic layers were combined and back-extracted with  
337 0.5 N NaOH twice; the organic fraction was then discarded. The aqueous fractions were combined,  
338 acidified to pH 1 with 6 N HCl, producing a cloudy, white suspension, and extracted 5 times with  
339 dichloromethane. The organic fractions were combined and washed with 1 N HCl and brine, then  
340 dried over MgSO<sub>4</sub> and concentrated under reduced pressure to give a colorless solid. This residue  
341 was purified by column chromatography (5%→15% ethyl acetate:hexanes) to give **S11** (0.265 g,  
342 1.63 mmol, 52% yield) as a viscous, light-yellow oil.

343

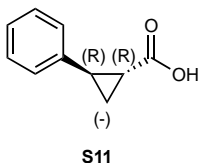

344

345 Data for (1*R*,2*R*)-2-phenylcyclopropane-1-carboxylic acid (**S11**)

346 <sup>1</sup>H NMR (500 MHz, CDCl<sub>3</sub>) δ 11.69 (s, 1H), 7.26 (td, *J* = 7.2, 1.3 Hz, 2H), 7.22 – 7.16 (m, 1H),  
347 7.11 – 7.05 (m, 2H), 2.58 (ddd, *J* = 9.2, 6.7, 4.1 Hz, 1H), 1.88 (ddd, *J* = 8.2, 5.2, 4.1 Hz, 1H),  
348 1.64 (dt, *J* = 9.6, 4.9 Hz, 1H), 1.38 (ddd, *J* = 8.3, 6.7, 4.6 Hz, 1H).

349 <sup>13</sup>C NMR (500 MHz, CDCl<sub>3</sub>) δ 179.85, 139.84, 128.62, 126.72, 126.39, 27.00, 24.37, 17.57.

350 FTIR (neat, cm<sup>-1</sup>) ν<sub>max</sub>: 3029 br (O–H), 1689 vs (C=O), 1427 s (O–H)

351 [α]<sub>D</sub><sup>25</sup> = -378 degrees (c = 0.011, CHCl<sub>3</sub>)

352 R<sub>f</sub> (20:80 ethyl acetate:hexanes): 0.16

353 <sup>1</sup>H-NMR and <sup>13</sup>C-NMR, and [α]<sub>D</sub><sup>25</sup> of **S11** were consistent with those reported previously<sup>73</sup>.

354

355 **Synthesis of (1*S*,2*S*)-2-phenylcyclopropane-1-carboxylic acid (**S12**)**

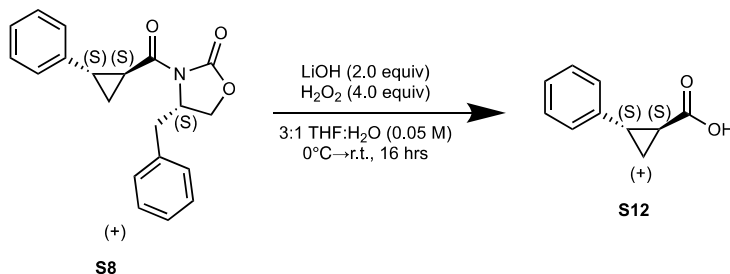

356

357 Procedure modified from Evans *et al*<sup>72</sup>. To a 100-mL, round-bottom flask containing a  
358 magnetic stirring bar under an atmosphere of air were added **S8** (0.972 g, 3.02 mmol, 1.0 equiv)  
359 and 60 mL of 3:1 THF:H<sub>2</sub>O (0.05 M). This solution was allowed to stir at room temperature for 5  
360 min before 30% H<sub>2</sub>O<sub>2</sub> (1.23 mL, 12.1 mmol, 4.0 equiv) was added. LiOH (254 mg, 6.05 mmol,  
361 2.0 equiv) was then added to the reaction mixture as one portion and allowed to stir at room  
362 temperature for 16 h. Sodium sulfite (1.68 g, 13.3 mmol, 4.4 equiv) was dissolved in 10 mL of  
363 diH<sub>2</sub>O and added to the reaction mixture. The resulting solution was allowed to stir at room  
364 temperature for an additional 10 min. The reaction mixture was transferred to a separatory funnel,  
365 10 mL of 1 N NaOH was added, and the aqueous layer was extracted with dichloromethane twice  
366 to remove neutral organic products. The organic layers were combined and back-extracted with  
367 0.5 N NaOH twice; the organic fraction was then discarded. The aqueous fractions were combined,  
368 acidified to pH 1 with 6 N HCl, producing a cloudy, white suspension, and extracted 5 times with  
369 dichloromethane. The organic fractions were combined and washed with 1 N HCl and brine, then  
370 dried over MgSO<sub>4</sub> and concentrated under reduced pressure to give a colorless solid. This residue  
371 was purified by column chromatography (5%→15% ethyl acetate:hexanes) give **S12** (0.328 g,  
372 2.02 mmol, 67% yield) as a viscous, colorless liquid which solidified to a colorless solid after  
373 standing for 2 days.

374

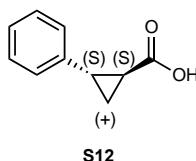

375  
376 Data for (1*S*,2*S*)-2-phenylcyclopropane-1-carboxylic acid (**S12**)  
377 <sup>1</sup>H NMR (500 MHz, CDCl<sub>3</sub>) δ 11.33 (s, 1H), 7.26 (td, *J* = 7.3, 1.4 Hz, 2H), 7.22 – 7.16 (m, 1H),  
378 7.11 – 7.05 (m, 2H), 2.58 (ddd, *J* = 9.3, 6.7, 4.1 Hz, 1H), 1.88 (ddd, *J* = 8.3, 5.2, 4.1 Hz, 1H), 1.64  
379 (dt, *J* = 9.6, 4.9 Hz, 1H), 1.38 (ddd, *J* = 8.4, 6.7, 4.6 Hz, 1H).

380 <sup>13</sup>C NMR (500 MHz, CDCl<sub>3</sub>) δ 180.00, 139.64, 128.67, 126.84, 126.41, 27.24, 24.13, 17.64.

381 FTIR (neat, cm<sup>-1</sup>) ν<sub>max</sub>: 3029 br (O–H), 1686 vs (C=O), 1444 s (O–H)

382 [α]<sub>D</sub><sup>25</sup> = +388 degrees (c = 0.011, CHCl<sub>3</sub>)

383 R<sub>f</sub> (20:80 ethyl acetate:hexanes): 0.16

384 <sup>1</sup>H-NMR and <sup>13</sup>C-NMR, and [α]<sub>D</sub><sup>25</sup> of **S12** were consistent with those reported previously<sup>73</sup>.

385

386 **Synthesis of *O*-((1*R*,2*S*)-2-phenylcyclopropane-1-carbonyl)-L-serine (**1**)**

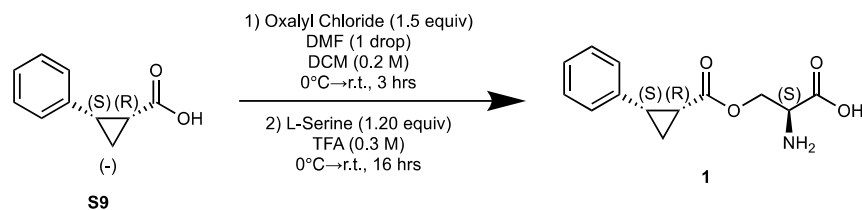

387

388 To a flame-dried, 1-dram (3.7 mL) vial equipped with magnetic stirring bar was added **S9**  
 389 (73.6 mg, 0.454 mmol, 1.0 equiv). The vial was placed under vacuum and backfilled with nitrogen  
 390 3 times. To the vial was added 2.3 mL of dry, degassed dichloromethane (0.2 M), and this solution  
 391 was allowed to stir at room temperature under an atmosphere of nitrogen for 5 min. One drop of  
 392 dimethylformamide was added to the reaction mixture, and the resulting mixture was allowed to  
 393 stir for 2 min. The vial was allowed to cool to 0 °C in an ice-water bath for 10 min before oxalyl  
 394 chloride (58 μL, 0.681 mmol, 1.5 equiv) was added dropwise over 5 min. The reaction was allowed  
 395 to warm to room temperature over 3 h under an atmosphere of nitrogen. The reaction mixture was  
 396 concentrated under reduced pressure to an orange residue and dried under vacuum to give a orange  
 397 oil. This oil was dissolved in 0.5 mL of trifluoroacetic acid.

398 To a separate, flame-dried, 1-dram vial containing a magnetic stirring bar was added L-  
 399 serine (57.3 mg, 0.545 mmol, 1.2 equiv). The vial was placed under vacuum and backfilled with  
 400 nitrogen 3 times. To the vial was added 1 mL of trifluoroacetic acid (final reaction concentration  
 401 0.3 M), and the resulting mixture was allowed to stir at room temperature until all of the L-serine  
 402 had dissolved. The L-serine solution was then cooled to 0 °C in an ice-water bath under nitrogen  
 403 for 30 min. In a separate vessel, the acyl chloride solution was allowed to cool to 0 °C in an ice-  
 404 water bath under nitrogen for 30 min. The solution of acyl chloride was slowly added dropwise to  
 405 the L-serine solution over 5 min, and this reaction mixture was allowed to warm to room  
 406 temperature under an atmosphere of nitrogen for 16 h. After completion of the reaction, the  
 407 reaction mixture was transferred to a beaker containing 10 mL of cold diethyl ether, causing  
 408 precipitation of a yellow solid. The yellow solid was filtered through a fine glass frit and washed  
 409 with diethyl ether. To this crude solid was added 5 mL of diH<sub>2</sub>O, producing a yellow solution.  
 410 Saturated NaHCO<sub>3</sub> was added until the solution reached pH 5.5, causing a light yellow solid to  
 411 precipitate. The mother liquor was removed, and the yellow solid was recrystallized from boiling  
 412 diH<sub>2</sub>O to give **1** (22.6 mg, 0.091 mmol, 20% yield) as colorless, reflective crystals.

413



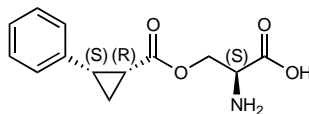

1

414

415 Data for *O*-((1*R*,2*S*)-2-phenylcyclopropane-1-carbonyl)-L-serine (**1**)

416 <sup>1</sup>H NMR (500 MHz, acetic acid-d<sub>4</sub>) δ 7.31 – 7.13 (m, 5H), 4.42 (dd, *J* = 12.3, 3.0 Hz, 1H), 4.25  
 417 (dd, *J* = 12.4, 5.3 Hz, 1H), 4.21 – 4.13 (m, 1H), 2.68 (q, *J* = 8.5 Hz, 1H), 2.18 (ddd, *J* = 9.1, 7.6,  
 418 5.5 Hz, 1H), 1.68 (dt, *J* = 7.5, 5.4 Hz, 1H), 1.41 (td, *J* = 8.2, 4.9 Hz, 1H).

419 <sup>13</sup>C NMR (126 MHz, acetic acid-d<sub>4</sub>) δ 172.55, 171.53, 137.29, 130.27, 129.02, 127.73, 63.45,  
 420 54.87, 27.11, 21.93, 12.32.

421 FTIR (neat, cm<sup>-1</sup>) ν<sub>max</sub>: 3192 br (N–H), 2982 br (O–H), 1729 s (C=O), 1603 s (C=O)

422 HRMS (ESI): *m/z* for C<sub>13</sub>H<sub>15</sub>NNaO<sub>4</sub><sup>+</sup> [M+Na]<sup>+</sup> calcd.: 272.0893, found: 272.0893.

423 T<sub>r</sub> (HPLC-MS): 18.1 min

424 The absolute configuration of the product is determined by the correlation to the known absolute  
 425 configuration of the reactants.

426

427 **Synthesis of *O*-((1*S*,2*R*)-2-phenylcyclopropane-1-carbonyl)-L-serine (**2**)**

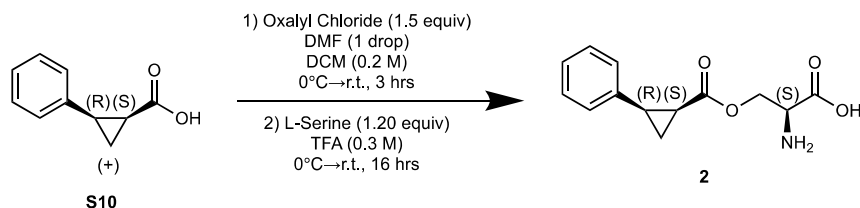

428

429 To a flame-dried, 10-mL conical flask equipped with magnetic stirring bar was added **S10**  
 430 (200 mg, 1.23 mmol, 1.0 equiv). The flask was placed under vacuum and backfilled with nitrogen  
 431 3 times. To the flask was added 6.2 mL of dry, degassed dichloromethane (0.2 M), and this solution  
 432 was allowed to stir at room temperature under an atmosphere of nitrogen for 5 min. Five drops of  
 433 dimethylformamide were added to the reaction mixture, and the resulting mixture was allowed to  
 434 stir for 2 min. This solution was allowed to cool to 0 °C in an ice-water bath for 10 min before  
 435 oxalyl chloride (0.158 mL, 1.85 mmol, 1.5 equiv) was added dropwise over 5 min. The reaction  
 436 was allowed to warm to room temperature over 3 h under an atmosphere of nitrogen. The reaction  
 437 mixture was concentrated under reduced pressure to an orange residue and dried under vacuum to  
 438 give an orange oil. This oil was dissolved in 1.0 mL of trifluoroacetic acid.

439 To a separate, flame-dried, 5-mL conical flask containing a magnetic stirring bar was added  
440 L-serine (0.155 g, 1.48 mmol, 1.2 equiv). The flask was placed under vacuum and backfilled with  
441 nitrogen 3 times. To the flask was added 3.0 mL of trifluoroacetic acid (final reaction concentration  
442 0.3 M), and the resulting mixture was allowed to stir at room temperature until all of the L-serine  
443 had dissolved. The L-serine solution was then cooled to 0 °C in an ice-water bath under nitrogen  
444 for 30 min. In a separate vessel, the acyl chloride solution was allowed to cool to 0 °C in an ice-  
445 water bath under nitrogen for 30 min. The solution of acyl chloride was slowly added dropwise to  
446 the L-serine solution over 5 min, and this reaction mixture was allowed to warm to room  
447 temperature under an atmosphere of nitrogen for 16 h. After completion of the reaction, the  
448 reaction mixture was transferred to a beaker containing 20 mL of cold diethyl ether, causing  
449 precipitation of an off-white solid. The crude solid was filtered through a fine glass frit and washed  
450 with diethyl ether. To the crude solid was added 5 mL of diH<sub>2</sub>O, producing a light-yellow solution.  
451 Saturated NaHCO<sub>3</sub> was added until the solution reached pH 5.5, causing a light yellow solid to  
452 precipitate. The mother liquor was removed, and the crude material was recrystallized from boiling  
453 diH<sub>2</sub>O to give **2** (123 mg, 0.493 mmol, 40% yield) as colorless, reflective crystals.

454

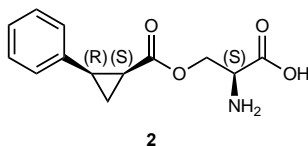

455

456 Data for *O*-((1*S*,2*R*)-2-phenylcyclopropane-1-carbonyl)-L-serine (**2**)

457 <sup>1</sup>H NMR (500 MHz, acetic acid-d<sub>4</sub>) δ 7.33 – 7.12 (m, 5H), 4.37 – 4.26 (m, 2H), 4.17 (dd, *J* = 4.9,  
458 3.6 Hz, 1H), 2.70 (q, *J* = 8.5 Hz, 1H), 2.26 – 2.12 (m, 1H), 1.70 (dt, *J* = 7.7, 5.4 Hz, 1H), 1.43 (td,  
459 *J* = 8.2, 5.1 Hz, 1H).

460 <sup>13</sup>C NMR (126 MHz, acetic acid-d<sub>4</sub>) δ 172.67, 171.12, 136.97, 129.99, 128.87, 127.60, 63.19,  
461 54.58, 27.08, 22.00, 12.29.

462 FTIR (neat, cm<sup>-1</sup>) *ν*<sub>max</sub>: 2982 br (O–H), 1728 s (C=O), 1601s (C=O)

463 HRMS (ESI): *m/z* for C<sub>13</sub>H<sub>15</sub>NNaO<sub>4</sub><sup>+</sup> [M+Na]<sup>+</sup> calcd.: 272.0893, found: 272.0894.

464 T<sub>r</sub> (HPLC-MS): 19.7 min

465 The absolute configuration of the product is determined by the correlation to the known absolute  
466 configuration of the reactants.

467

468 **Synthesis of *O*-((1*R*,2*R*)-2-phenylcyclopropane-1-carbonyl)-L-serine (**3**)**

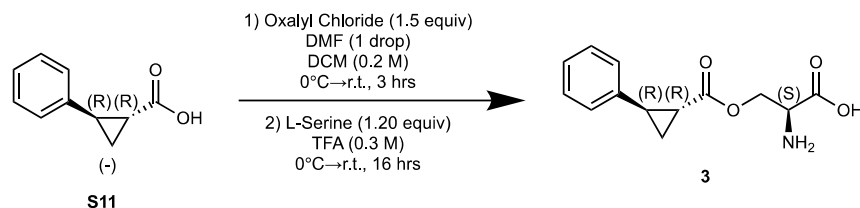

469

470 To a flame-dried, 10-mL conical flask equipped with magnetic stirring bar was added **S11**  
 471 (200 mg, 1.23 mmol, 1.0 equiv). The flask was placed under vacuum and backfilled with nitrogen  
 472 3 times. To the flask was added 6.2 mL of dry, degassed dichloromethane (0.2 M), and this solution  
 473 was allowed to stir at room temperature under an atmosphere of nitrogen for 5 min. Five drops of  
 474 dimethylformamide were added to the reaction mixture, and the resulting mixture was allowed to  
 475 stir for 2 min. This solution was allowed to cool to 0 °C in an ice-water bath for 10 min before  
 476 oxalyl chloride (0.158 mL, 1.85 mmol, 1.5 equiv) was added dropwise over 5 min. The reaction  
 477 was allowed to warm to room temperature over 3 h under an atmosphere of nitrogen. The reaction  
 478 mixture was concentrated under reduced pressure to an orange residue and dried under vacuum to  
 479 give an orange oil. This oil was dissolved in 1.0 mL of trifluoroacetic acid.

480 To a separate, flame-dried, 5-mL conical flask containing a magnetic stirring bar was added  
 481 L-serine (0.155 g, 1.48 mmol, 1.2 equiv). The flask was placed under vacuum and backfilled with  
 482 nitrogen 3 times. 3.0 mL of trifluoroacetic acid (final reaction concentration 0.3 M) was added to  
 483 the flask, and the resulting mixture was allowed to stir at room temperature until all of the L-serine  
 484 had dissolved. The L-serine solution was then cooled to 0 °C in an ice-water bath under nitrogen  
 485 for 30 min. In a separate vessel, the acyl chloride solution was allowed to cool to 0 °C in an ice-  
 486 water bath under nitrogen for 30 min. The solution of acyl chloride was slowly added dropwise to  
 487 the L-serine solution over 5 min, and this reaction mixture was allowed to warm to room  
 488 temperature under an atmosphere of nitrogen for 16 h. After completion of the reaction, the  
 489 reaction mixture was transferred to a beaker containing 20 mL of cold diethyl ether, causing  
 490 precipitation of an off-white solid. The crude solid was filtered through a fine glass frit and washed  
 491 with diethyl ether. 5 mL of diH<sub>2</sub>O were added to the crude solid, producing a colorless solution.  
 492 Saturated NaHCO<sub>3</sub> was added until the solution reached pH 5.5, causing an off-white solid to  
 493 precipitate. The mother liquor was removed, and the crude material was recrystallized from boiling  
 494 diH<sub>2</sub>O to give **3** (24.1 mg, 0.097 mmol, 9% yield) as colorless, reflective crystals.

495

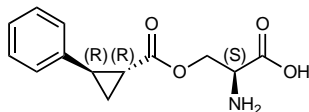

3

496

497 Data for *O*-((1*R*,2*R*)-2-phenylcyclopropane-1-carbonyl)-L-serine (**3**)

498 <sup>1</sup>H NMR (500 MHz, acetic acid-d<sub>4</sub>) δ 7.26 (t, *J* = 7.6 Hz, 1H), 7.18 (t, *J* = 7.4 Hz, 1H), 7.10 (d, *J*  
499 = 7.6 Hz, 1H), 4.71 – 4.56 (m, 1H), 2.62 – 2.48 (m, 1H), 1.94 (dt, *J* = 9.0, 4.9 Hz, 1H), 1.60 (dt,  
500 *J* = 9.7, 5.0 Hz, 1H), 1.41 (q, *J* = 6.7 Hz, 1H).

501 <sup>13</sup>C NMR (126 MHz, acetic acid-d<sub>4</sub>) δ 180.24, 139.73, 128.77, 126.95, 126.52, 27.36, 24.24,  
502 17.75.

503 FTIR (neat, cm<sup>-1</sup>) ν<sub>max</sub>: 3286 br (N–H), 3027 br (O–H), 1713 s (C=O), 1582 vs (C=O)

504 HRMS (ESI): *m/z* for C<sub>13</sub>H<sub>15</sub>NNaO<sub>4</sub><sup>+</sup> [M+Na]<sup>+</sup> calcd.: 272.0893, found: 272.0888.

505 T<sub>r</sub> (HPLC-MS): 28.1 min

506 The absolute configuration of the product is determined by the correlation to the known absolute  
507 configuration of the reactants.

508

509 **Synthesis of *O*-((1*S*,2*S*)-2-phenylcyclopropane-1-carbonyl)-L-serine (**4**)**

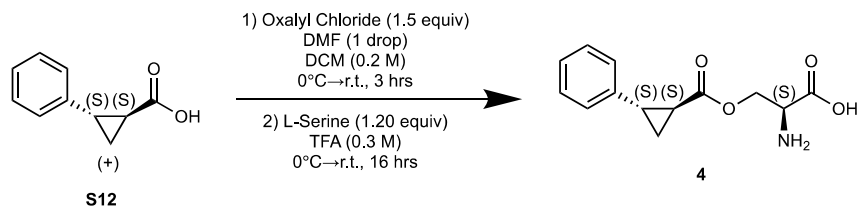

510

511 To a flame-dried, 10-mL conical flask equipped with magnetic stirring bar was added **S12**  
512 (200 mg, 1.23 mmol, 1.0 equiv). The flask was placed under vacuum and backfilled with nitrogen  
513 3 times. To the flask was added 6.2 mL of dry, degassed dichloromethane (0.2 M), and this solution  
514 was allowed to stir at room temperature under an atmosphere of nitrogen for 5 min. Five drops of  
515 dimethylformamide were added to the reaction mixture, and the resulting mixture was allowed to  
516 stir for 2 min. This solution was allowed to cool to 0 °C in an ice-water bath for 10 min before  
517 oxalyl chloride (0.158 mL, 1.85 mmol, 1.5 equiv) was added dropwise over 5 min. The reaction  
518 was allowed to warm to room temperature over 3 h under an atmosphere of nitrogen. The reaction  
519 mixture was concentrated under reduced pressure to an orange residue and dried under vacuum to  
520 give an orange oil. This oil was dissolved in 1.0 mL of trifluoroacetic acid.

521 To a separate, flame-dried, 5-mL conical flask containing a magnetic stirring bar was added  
522 L-serine (0.155 g, 1.48 mmol, 1.2 equiv). The flask was placed under vacuum and backfilled with  
523 nitrogen 3 times. To the flask was added 3.0 mL of trifluoroacetic acid (final reaction concentration  
524 0.3 M), and the resulting mixture was allowed to stir at room temperature until all of the L-serine  
525 had dissolved. The L-serine solution was then cooled to 0 °C in an ice-water bath under nitrogen  
526 for 30 min. In a separate vessel, the acyl chloride solution was allowed to cool to 0 °C in an ice-  
527 water bath under nitrogen for 30 min. The solution of acyl chloride was slowly added dropwise to  
528 the L-serine solution over 5 min, and this reaction mixture was allowed to warm to room  
529 temperature under an atmosphere of nitrogen for 16 h. After completion of the reaction, the  
530 reaction mixture was transferred to a beaker containing 20 mL of cold diethyl ether, causing  
531 precipitation of an off-white solid. The crude solid was filtered through a fine glass frit and washed  
532 with diethyl ether. To the crude solid was added 5 mL of diH<sub>2</sub>O, producing a colorless solution.  
533 Saturated NaHCO<sub>3</sub> was added until the solution reached pH 5.5, causing an off-white solid to  
534 precipitate. The mother liquor was removed, and the crude material was recrystallized from boiling  
535 diH<sub>2</sub>O to give **4** (60.0 mg, 0.241 mmol, 20% yield) as colorless, reflective crystals.

536

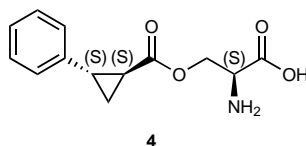

537

538 Data for *O*-((1*S*,2*S*)-2-phenylcyclopropane-1-carbonyl)-L-serine (**4**)

539 <sup>1</sup>H NMR (500 MHz, acetic acid-d<sub>4</sub>) δ 7.27 (t, *J* = 7.6 Hz, 2H), 7.19 (t, *J* = 7.3 Hz, 1H), 7.11 (d, *J*  
540 = 7.5 Hz, 2H), 4.73 – 4.54 (m, 2H), 4.36 (dd, *J* = 5.2, 2.9 Hz, 1H), 2.53 (ddd, *J* = 10.1, 6.7, 4.0 Hz,  
541 1H), 1.95 (dt, *J* = 8.8, 4.7 Hz, 1H), 1.61 (dt, *J* = 9.6, 4.9 Hz, 1H), 1.46 – 1.36 (m, 1H).

542 <sup>13</sup>C NMR (126 MHz, acetic acid-d<sub>4</sub>) δ 174.70, 171.62, 140.55, 129.38, 127.47, 126.84, 63.86,  
543 54.82, 27.49, 24.59, 18.02.

544 FTIR (neat, cm<sup>-1</sup>) ν<sub>max</sub>: 3013 br (O–H), 1717 s (C=O), 1603 s (C=O)

545 HRMS (ESI): *m/z* for C<sub>13</sub>H<sub>16</sub>NO<sub>4</sub><sup>+</sup> [M+H]<sup>+</sup> calcd.: 250.1074, found: 250.1076.

546 T<sub>r</sub> (HPLC-MS): 30.1 min

547 The absolute configuration of the product is determined by the correlation to the known absolute  
548 configuration of the reactants.

549

550 **Synthesis of standard for the product (aza-phtha, compound 5, mixture of C1 and C2**  
551 **diastereomers in Fig. 3d) of the reaction of azaserine with phthalan**

552  
553 **Synthesis of *tert*-butyl *N*-(*tert*-butoxycarbonyl)-*O*-(2-(1,3-dihydroisobenzofuran-1-yl)acetyl)-**  
554 ***L*-serinate (**S13**)**

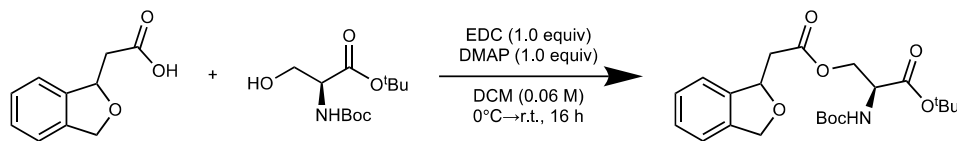

**S13**

555  
556 To a stirred solution of 2-(1,3-dihydroisobenzofuran-1-yl)acetic acid (222 mg, 1.25 mmol)  
557 in anhydrous dichloromethane (20 mL) at 0 °C under nitrogen was added EDC (239 mg, 1.25  
558 mmol) and the resulting reaction mixture was continued to stir for 30 mins. Then *tert*-butyl (*tert*-  
559 *butoxycarbonyl*)-*L*-serinate (326 mg, 1.25 mmol) was added, followed by the addition of DMAP  
560 (152 mg, 1.25 mmol). The ice bath was removed, and the reaction mixture was stirred at room  
561 temperature for 16 h. After evaporation of the solvent under reduced pressure, the residue was  
562 subjected to purification by column chromatography to give 409 mg of compound **S13** (*tert*-butyl  
563 *N*-(*tert*-butoxycarbonyl)-*O*-(2-(1,3-dihydroisobenzofuran-1-yl)acetyl)-*L*-serinate) as a mixture of  
564 two inseparable diastereomers (coelute from flash chromatography) in 78% yield.

565

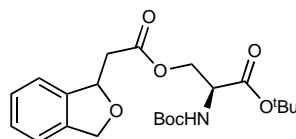

**S13**

566  
567 Data of *tert*-butyl *N*-(*tert*-butoxycarbonyl)-*O*-(2-(1,3-dihydroisobenzofuran-1-yl)acetyl)-*L*-  
568 serinate (**S13**):

569 <sup>1</sup>**H-NMR** (600 MHz, CDCl<sub>3</sub>)  $\delta$  (ppm) 7.32-7.27 (m, 4H), 7.25-7.22 (m, 2H), 7.19-7.16 (m, 2H),  
570 5.65-5.60 (m, 2H), 5.50-5.45 (m, 1H), 5.37-5.32 (m, 1H), 5.17-5.12 (m, 2H), 5.09-5.05 (dd, 2H, J  
571 = 12.2, 6.4 Hz), 4.50-4.37 (m, 6H), 2.86-2.81 (dd, 1H, J = 17.2, 4.6 Hz), 2.83-2.78 (dd, 1H, J =  
572 17.2, 4.6 Hz), 2.74-2.68 (m, 2H), 1.50-1.43 (m, 36H).

573 <sup>13</sup>**C NMR** (151 MHz, CDCl<sub>3</sub>)  $\delta$  170.29, 170.17, 168.78, 168.71, 155.24, 155.30, 140.45, 140.40,  
574 139.14, 139.12, 127.98, 127.53, 121.15 (2C), 121.10, 121.08, 82.67, 82.65, 80.22, 80.12,  
575 79.99(2C), 79.94(2C), 72.68, 72.64, 64.98, 64.94, 53.46, 53.39, 41.39, 41.37, 28.3(6C), 27.9 (2C).

576 **HRMS (ESI)** [M+Na]<sup>+</sup> calculated for C<sub>22</sub>H<sub>31</sub>NO<sub>7</sub>Na: 444.1993, found 444.1996.

577 **Synthesis of O-(2-(1,3-dihydroisobenzofuran-1-yl)acetyl)-L-serine (5)**

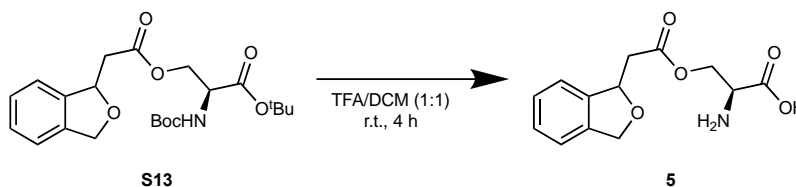

578  
 579 To a stirred solution of *tert*-butyl *N*-(*tert*-butoxycarbonyl)-*O*-(2-(1,3-  
 580 dihydroisobenzofuran-1-yl)acetyl)-*L*-serinate (**S13**, 15 mg, 0.036 mmol) in dichloromethane (1.0  
 581 mL) was added trifluoroacetic acid (1 mL, 13 mmol) and the resulting reaction mixture was  
 582 continued to stir for 4 h at room temperature. After evaporation of the solvent under reduced  
 583 pressure, the residue (13 mg) was obtained in 99% yield as a mixture of two diastereomers (with  
 584 1:1 ratio), which could not be separated by flash column chromatography. The compounds **5** were  
 585 used directly without further purification.

586

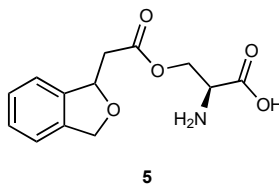

587  
 588 Data of *O*-(2-(1,3-dihydroisobenzofuran-1-yl)acetyl)-*L*-serine (**5**):

589 <sup>1</sup>H-NMR (600 MHz, CD<sub>3</sub>OD)  $\delta$  (ppm) 7.35-7.18 (m, 8H), 5.62-5.56 (m, 2H), 5.12-5.05 (dd, 2H,  
 590 J = 12.0, 2.4 Hz), 5.02-4.98 (d, 2H, J = 2.4 Hz), 4.60-4.56 (dd, 2H, J = 12.4, 3.3 Hz), 4.55-4.50  
 591 (ddd, 2H, J = 12.3, 4.8, 1.4 Hz), 4.35-4.31 (m, 2H), 2.97-2.92 (dd, 2H, J = 15.8, 4.1 Hz), 2.72-2.66  
 592 (ddd, 2H, J = 15.8, 8.6, 0.7 Hz).

593 <sup>13</sup>C NMR (151 MHz, CD<sub>3</sub>OD)  $\delta$  170.2, 170.1, 167.6 (2C), 140.0, 138.7, 127.8 (2C), 127.3 (2C),  
 594 120.83, 120.82, 120.79, 120.78, 80.2, 80.1, 72.2 (2C), 61.55, 61.54, 52.0 (2C), 40.6, 40.5.

595 **HRMS (ESI)** [M+H]<sup>+</sup> calculated for C<sub>13</sub>H<sub>16</sub>NO<sub>5</sub>: 266.1023, found 266.1025.

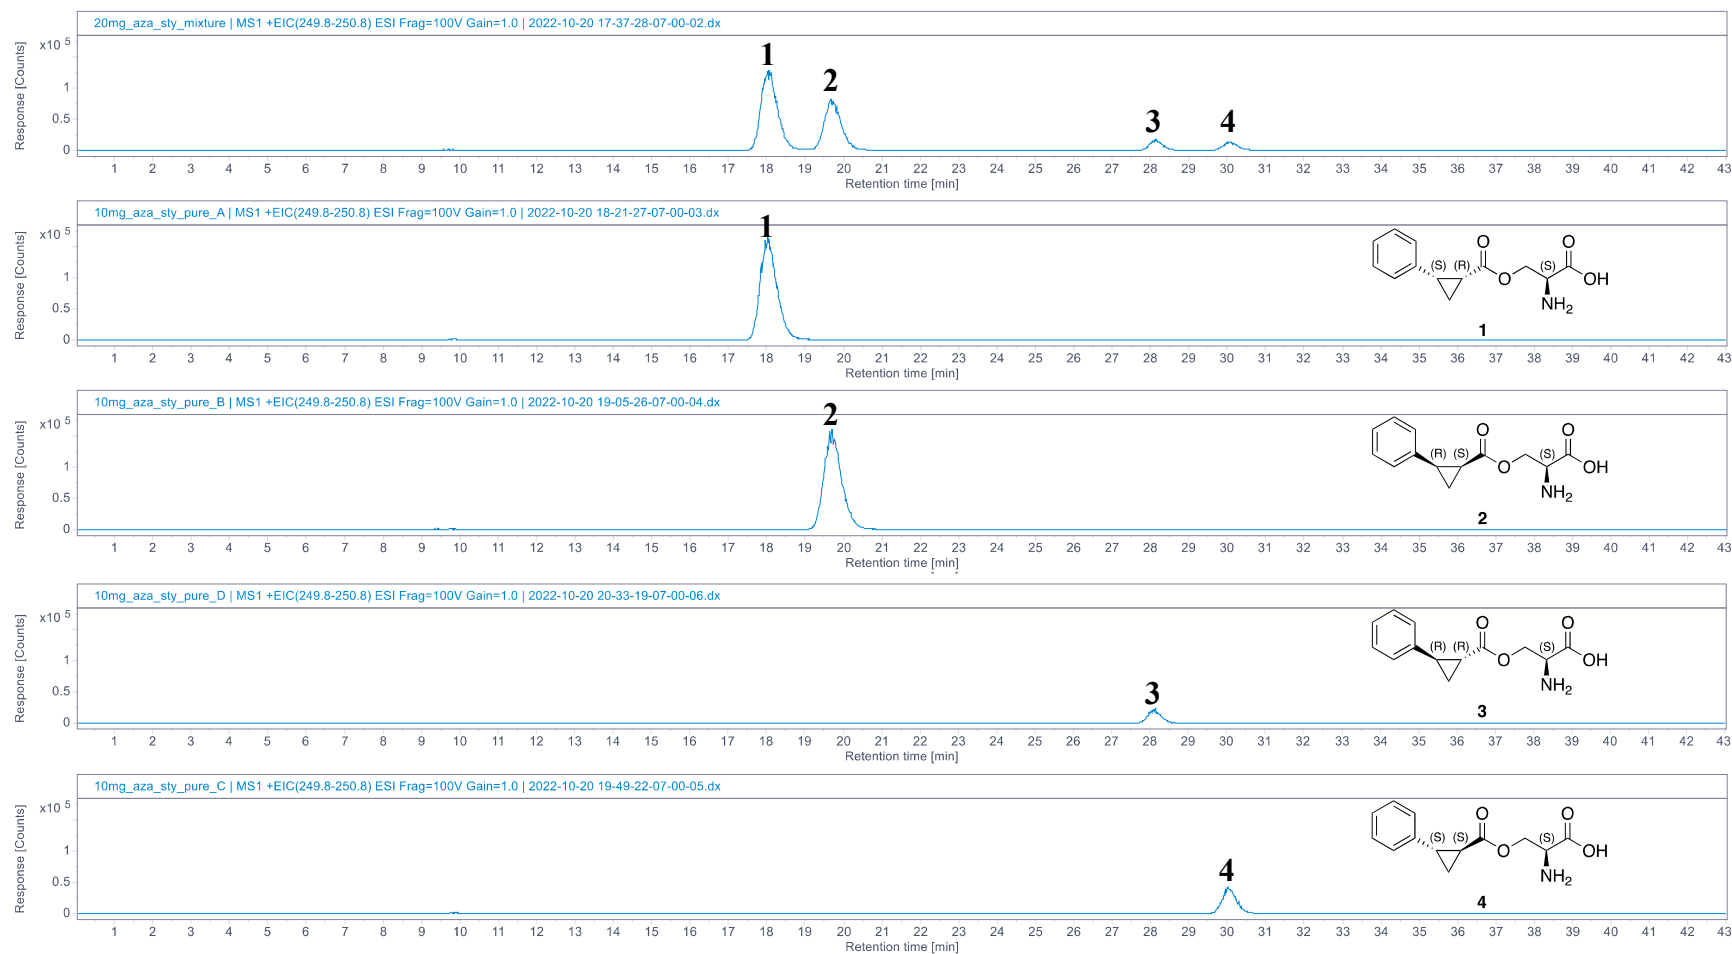

**Supplementary Fig. 1 | LC-MS traces of authentic aza-sty products.** Extracted ion chromatograms for synthetic aza-sty products (1, 2, 3, 4 correspond to P1, P2, P3, P4 peaks in the manuscript) ( $m/z$   $[\text{M}+\text{H}]^+ = 249.8\text{-}250.8$ ) by standard HPLC-MS method.



# NMR Spectra

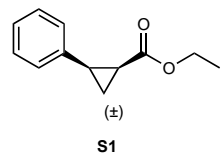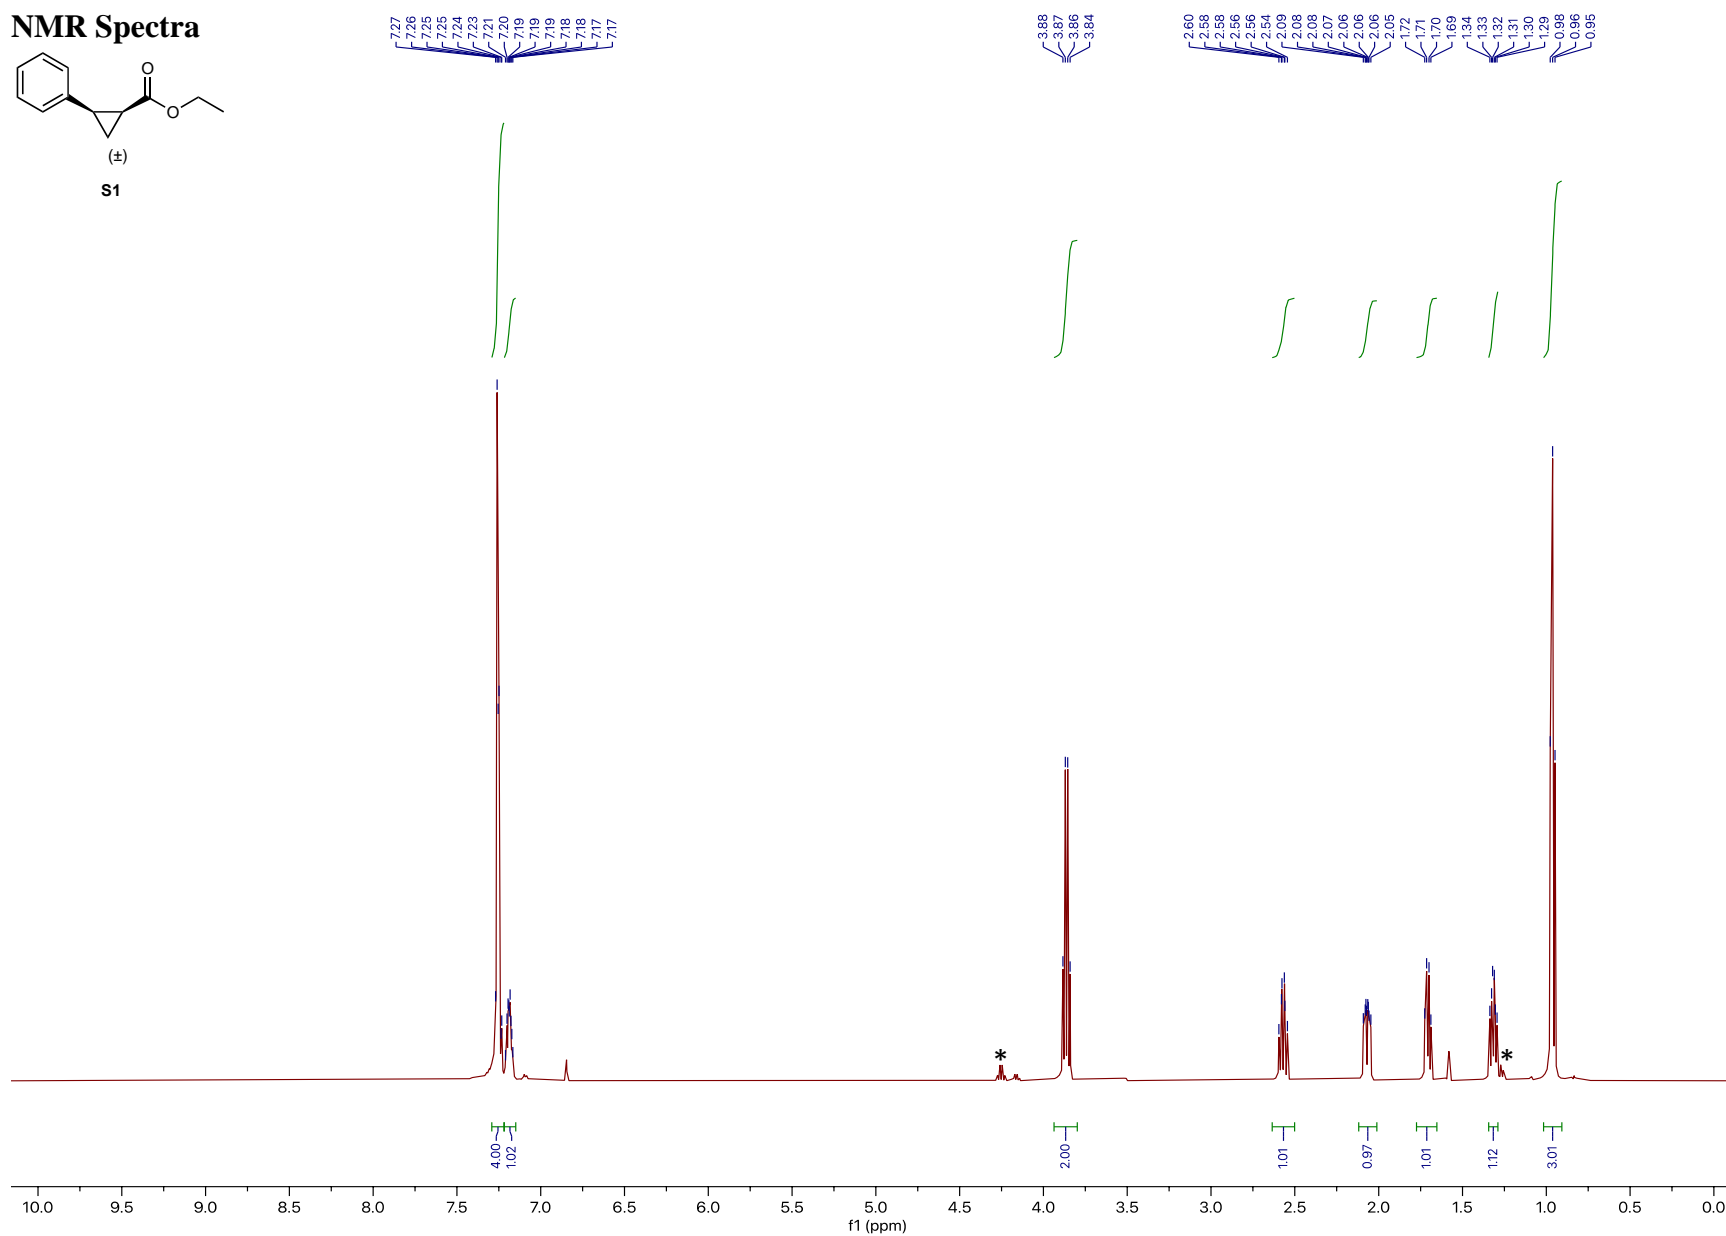

Supplementary Fig. 2 | <sup>1</sup>H-NMR (500 MHz, CDCl<sub>3</sub>) of S1. \*Impurity resulting from diastereomer S2, which is removed in later steps of the sequence.

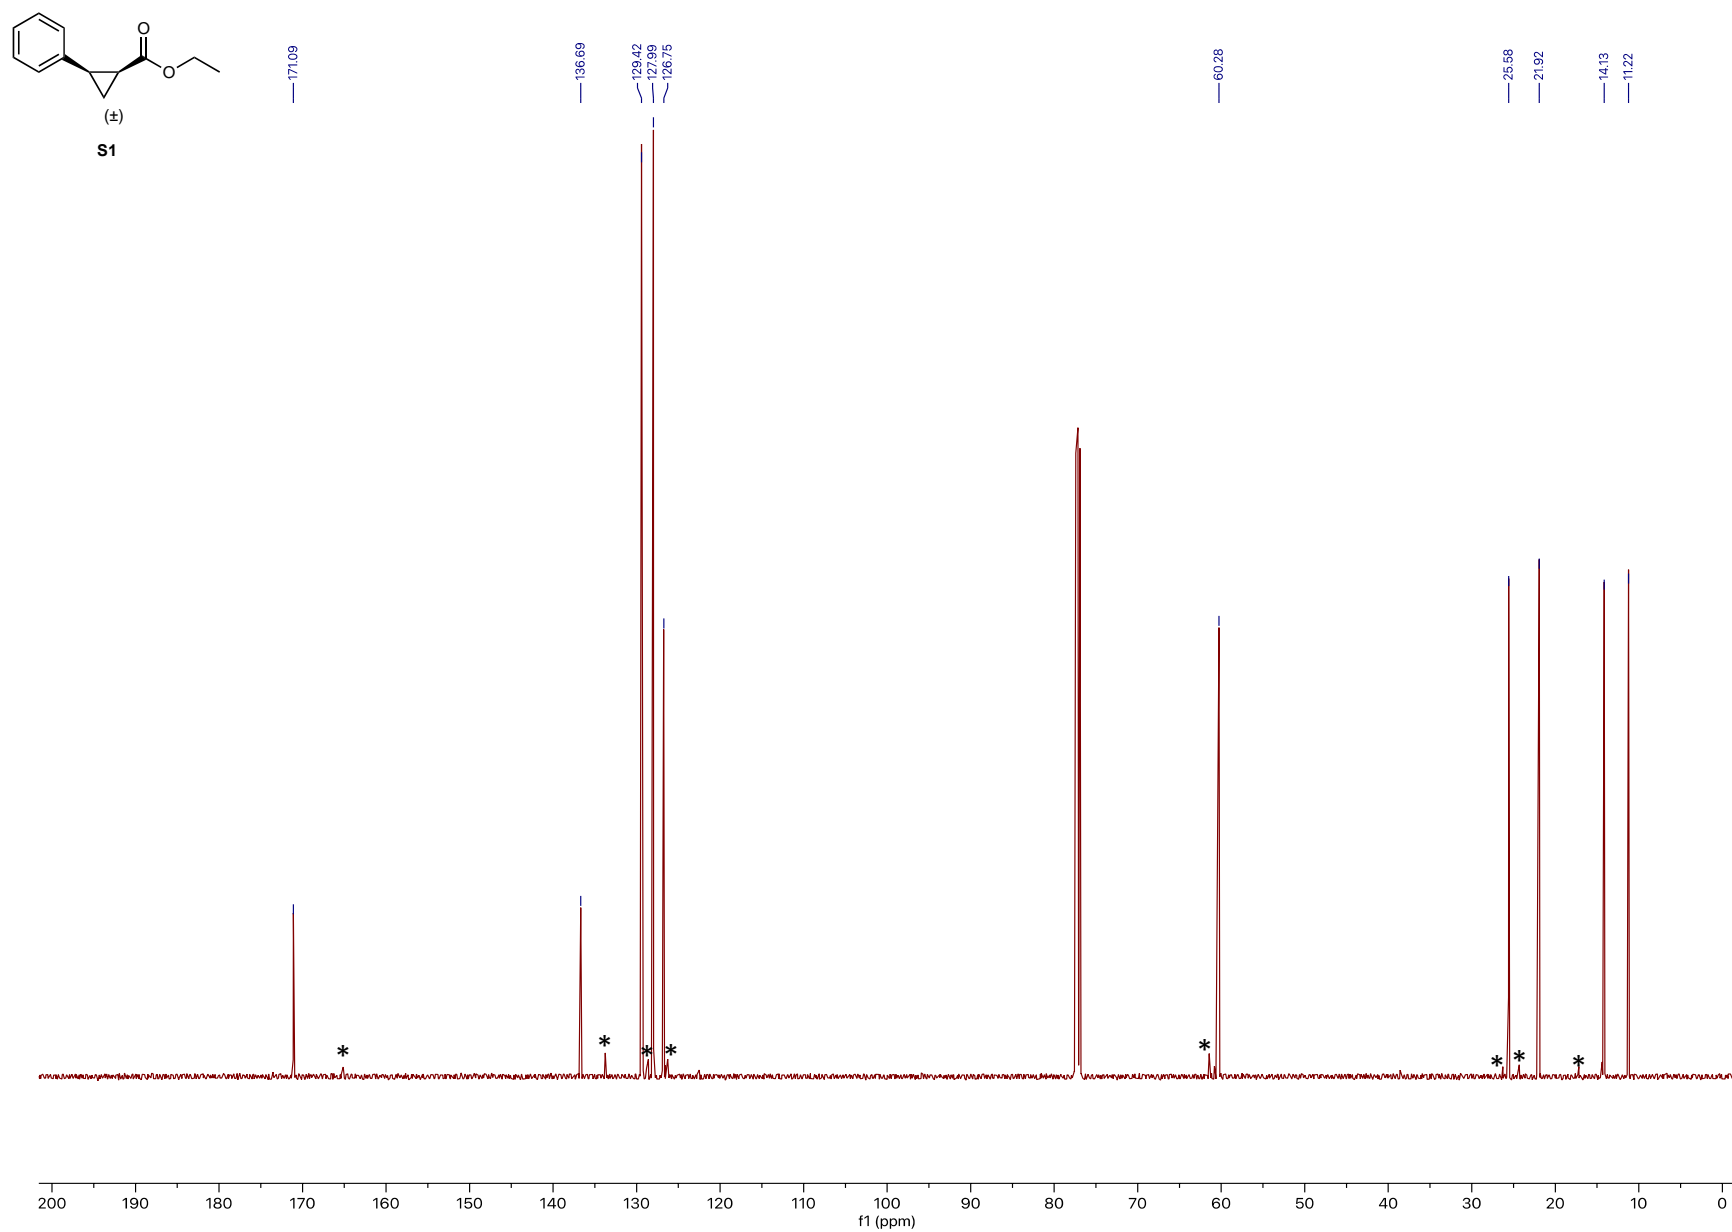

Supplementary Fig. 3 | <sup>13</sup>C-NMR (126 MHz, CDCl<sub>3</sub>) of S1. \*Impurity resulting from diastereomer S2, which is removed in later steps of the sequence.

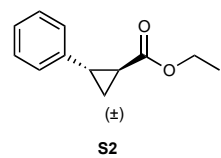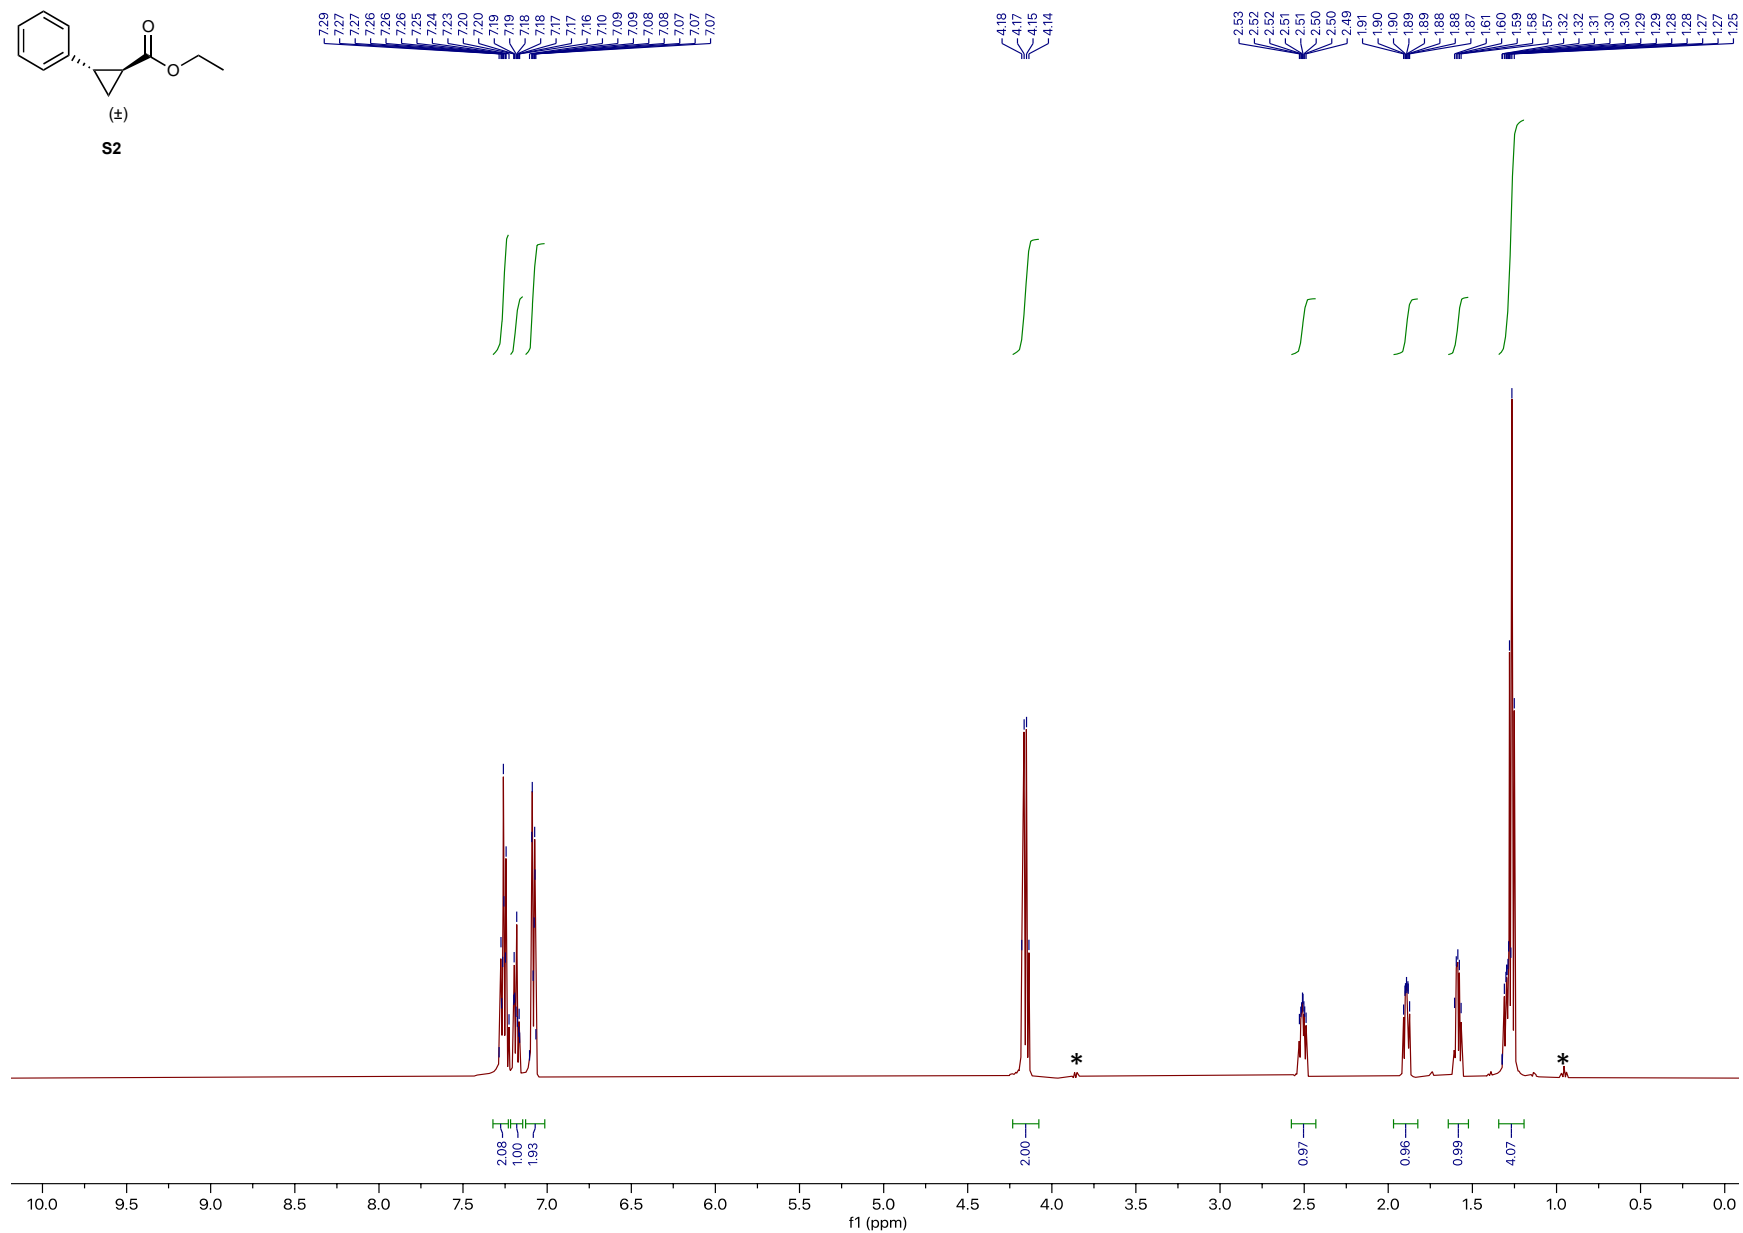

**Supplementary Fig. 4 | <sup>1</sup>H-NMR (500 MHz, CDCl<sub>3</sub>) of S2. \*Impurity resulting from diastereomer S1, which is removed in later steps of the sequence.**

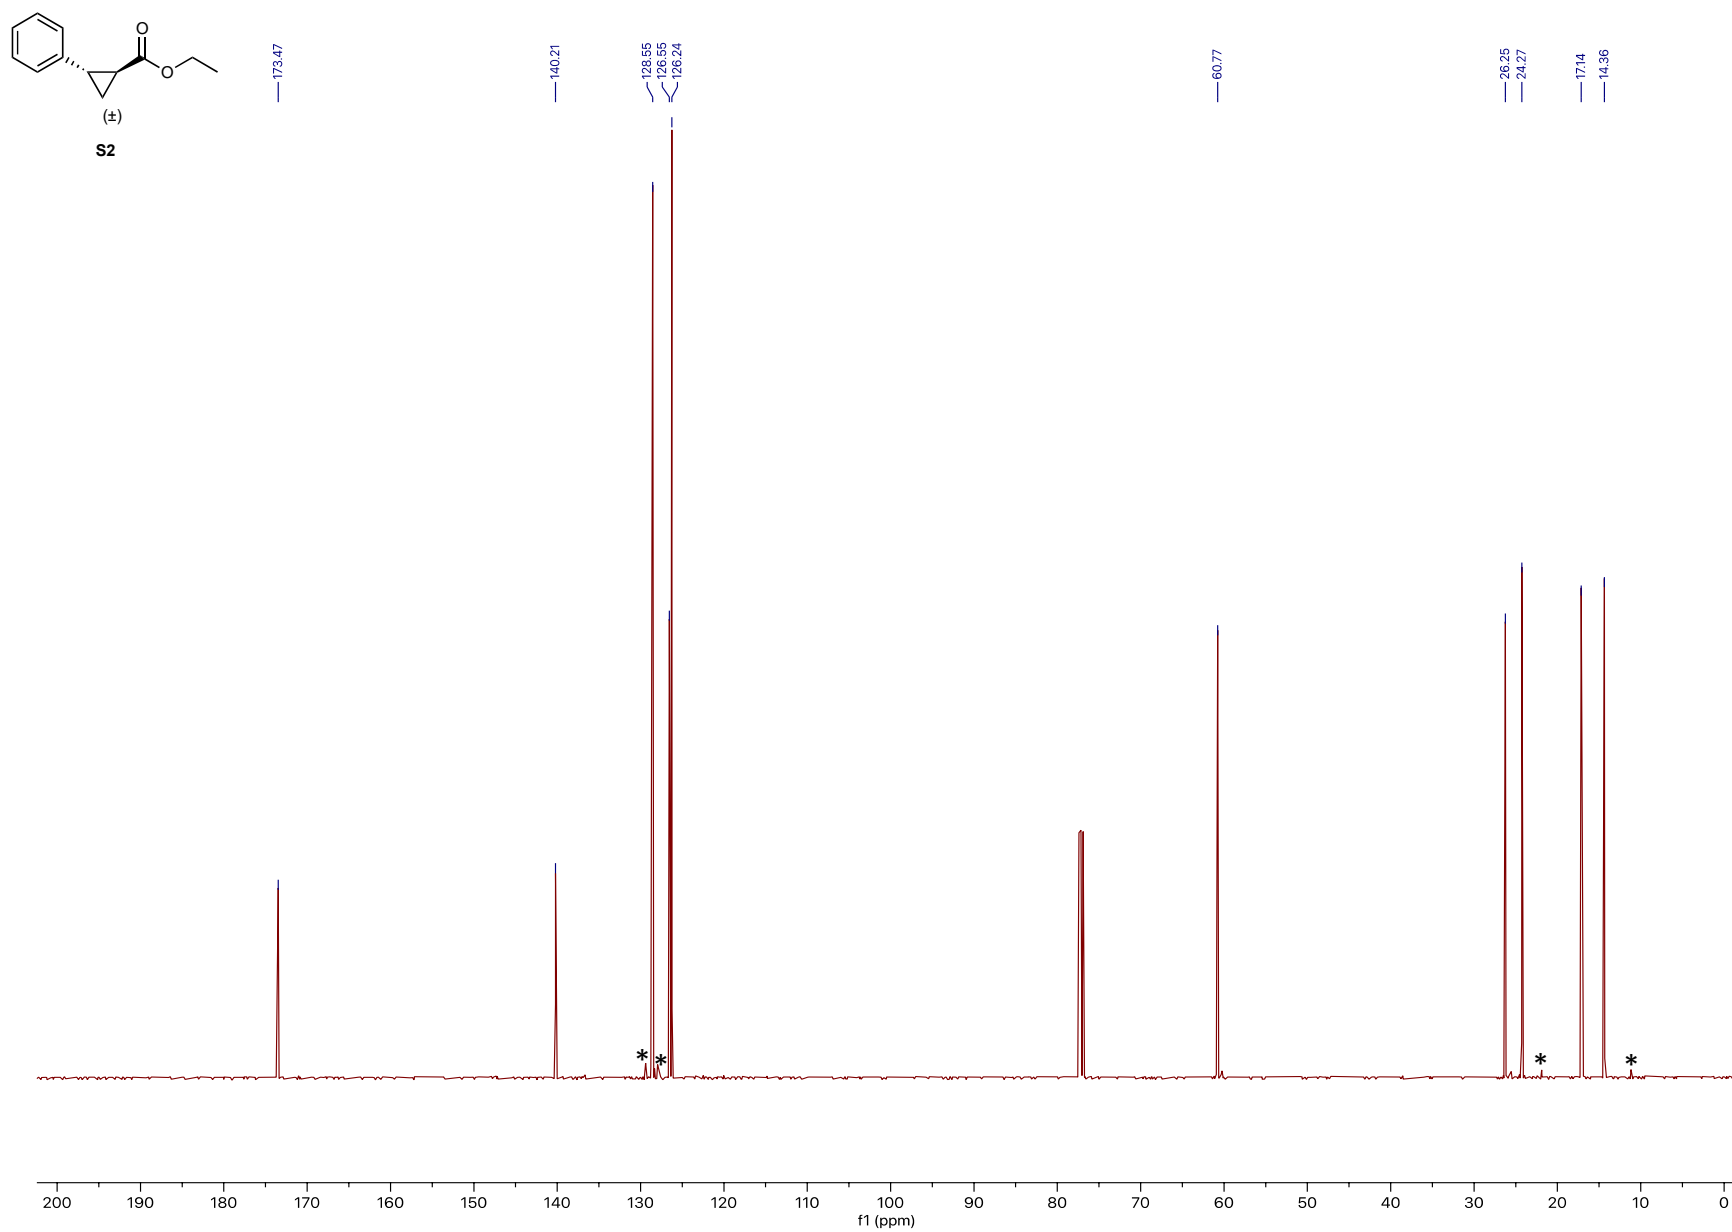

**Supplementary Fig. 5** |  $^{13}\text{C-NMR}$  (126 MHz,  $\text{CDCl}_3$ ) of **S2**. \*Impurity resulting from diastereomer **S1**, which is removed in later steps of the sequence.

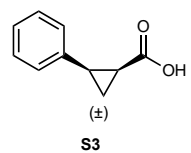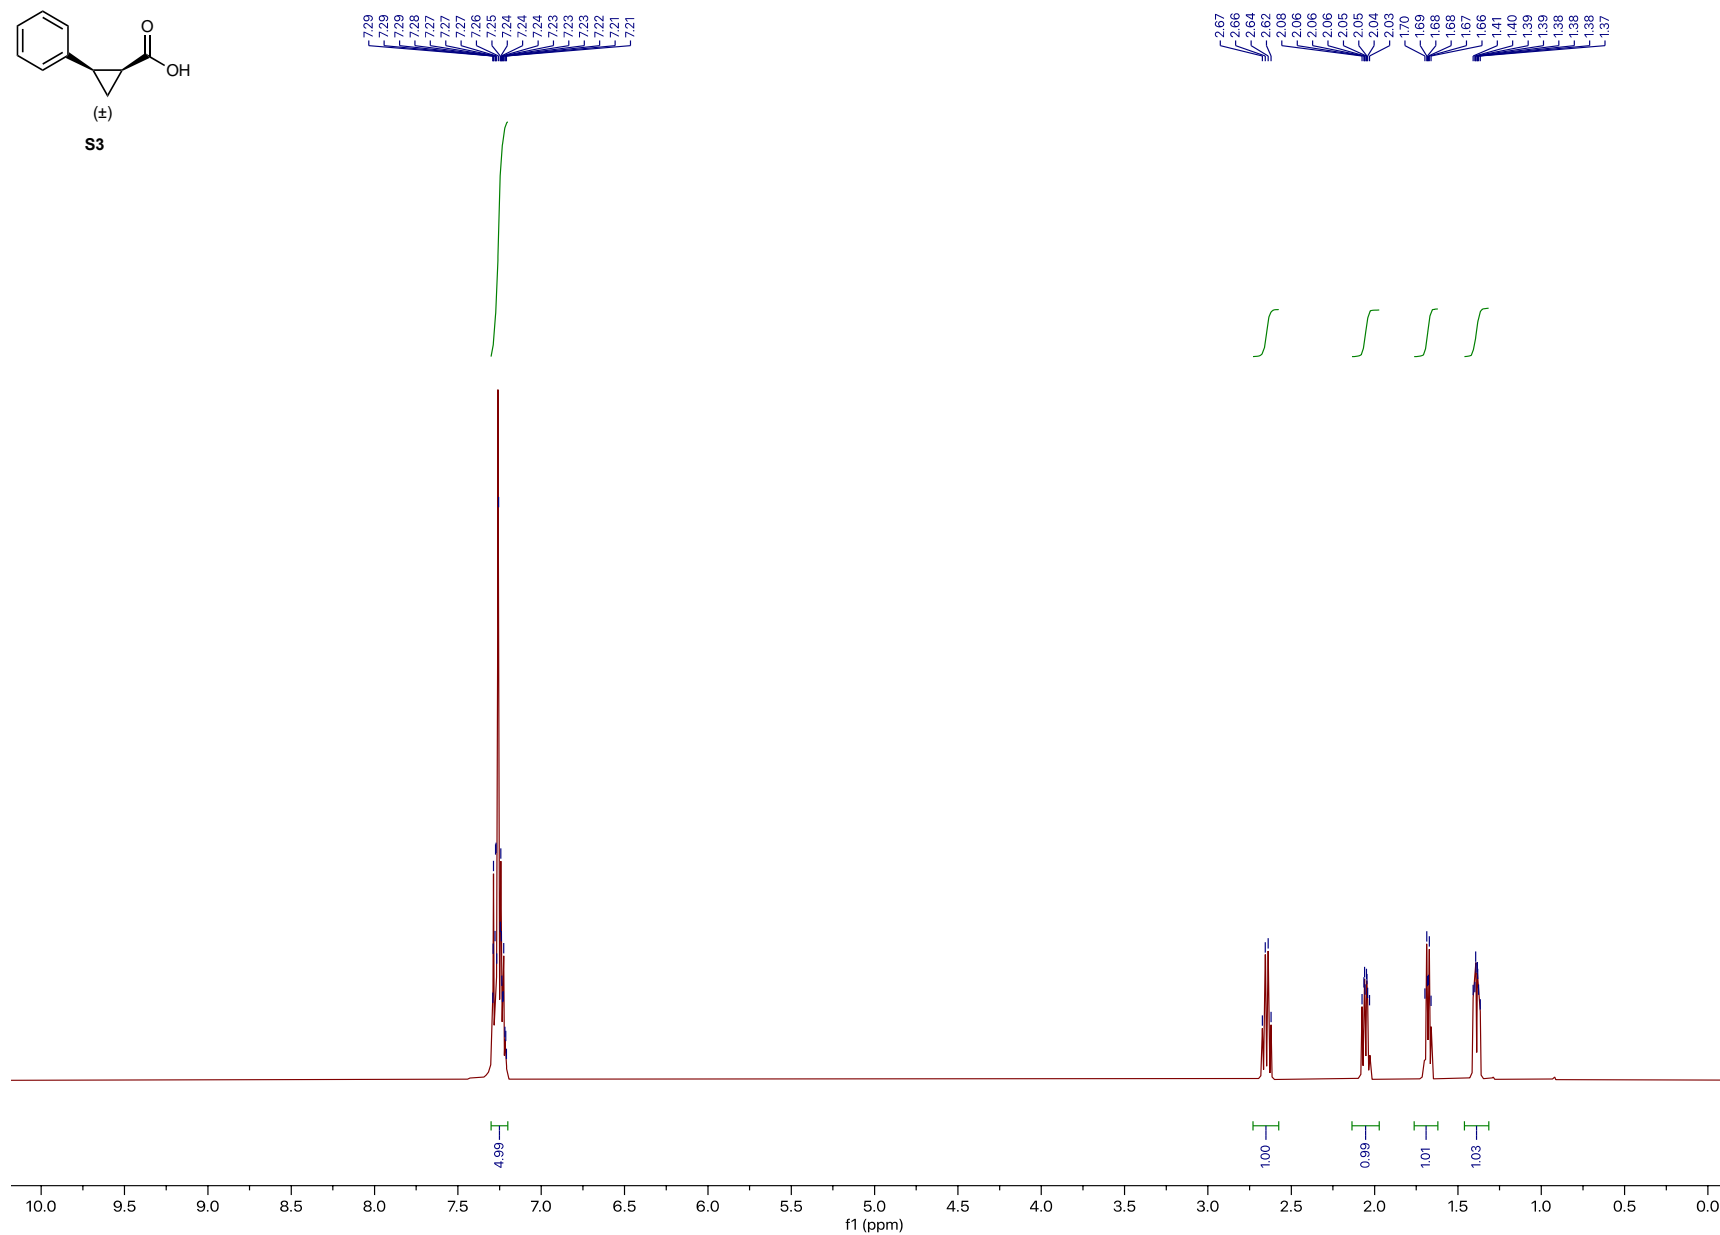

Supplementary Fig. 6 |  $^1\text{H-NMR}$  (500 MHz,  $\text{CDCl}_3$ ) of S3.

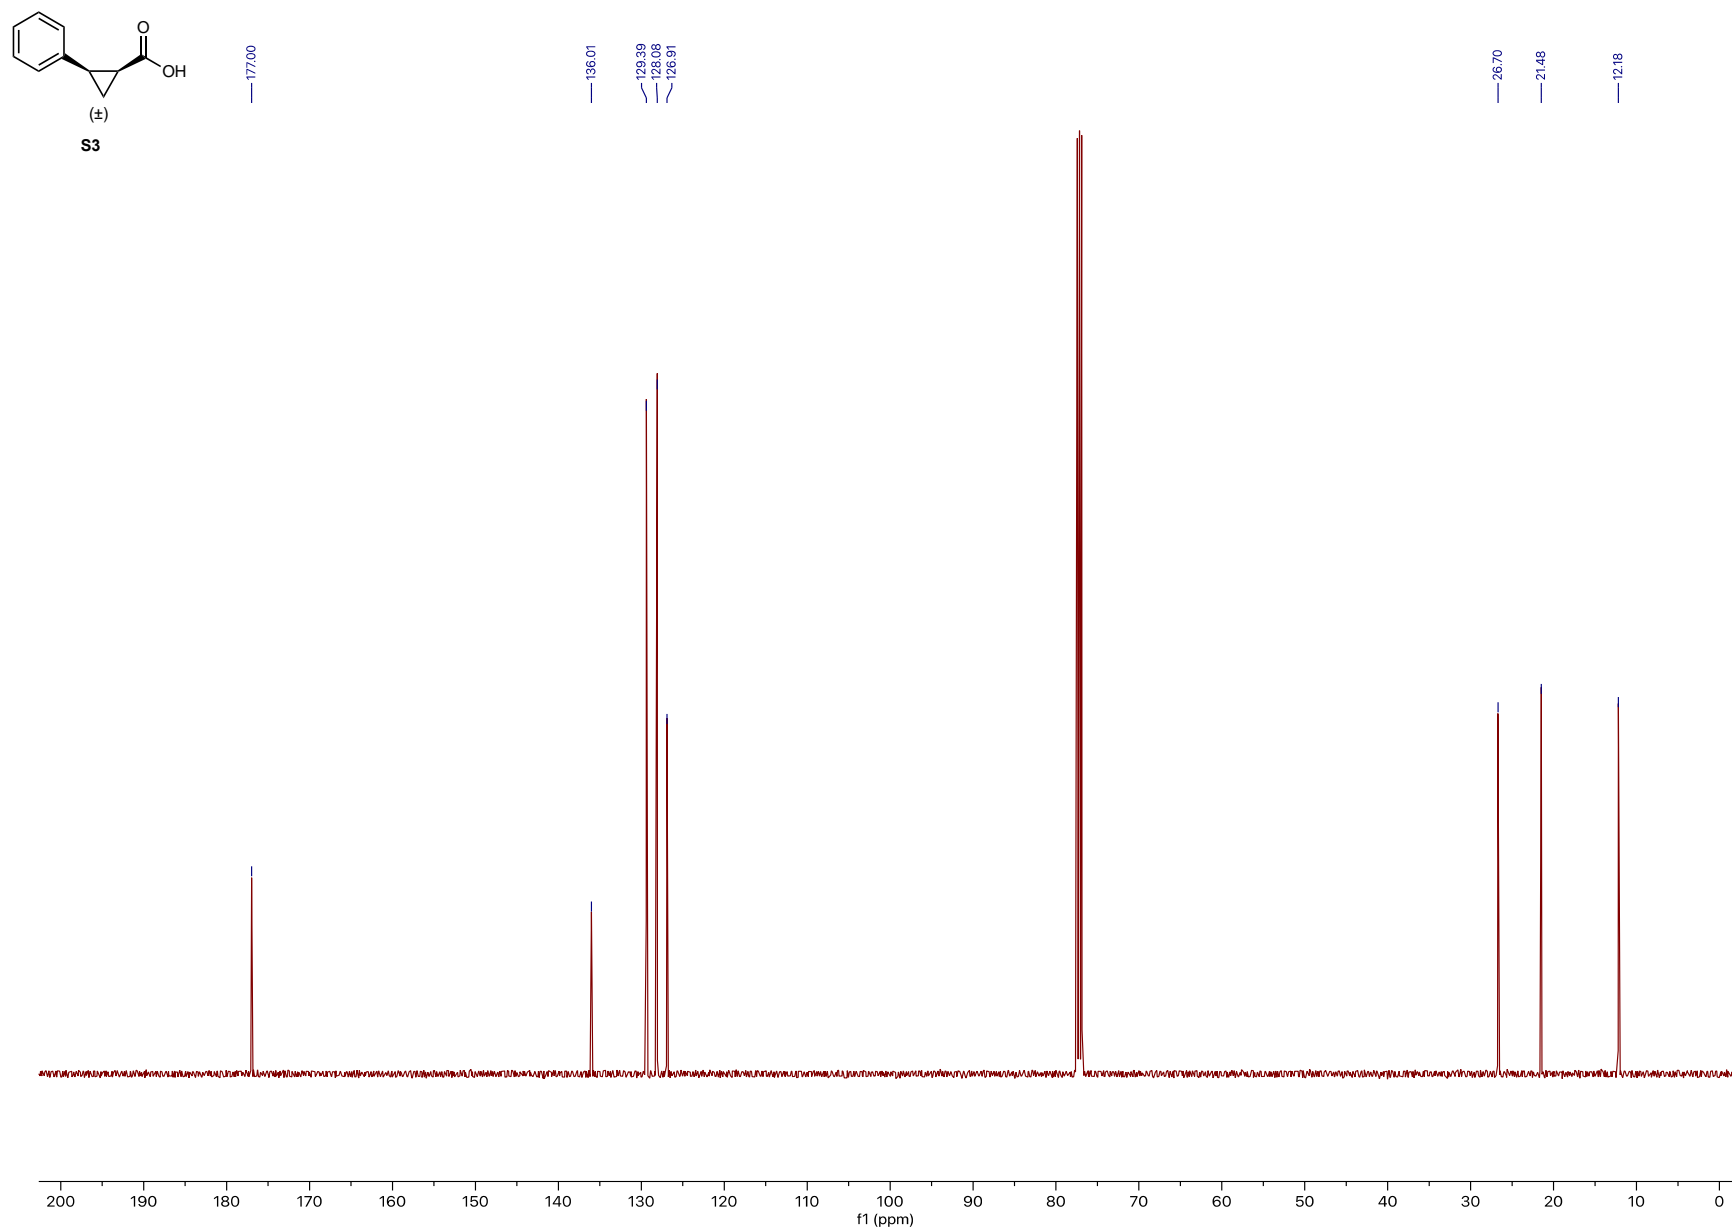

Supplementary Fig. 7 | <sup>13</sup>C-NMR (126 MHz, CDCl<sub>3</sub>) of S3.

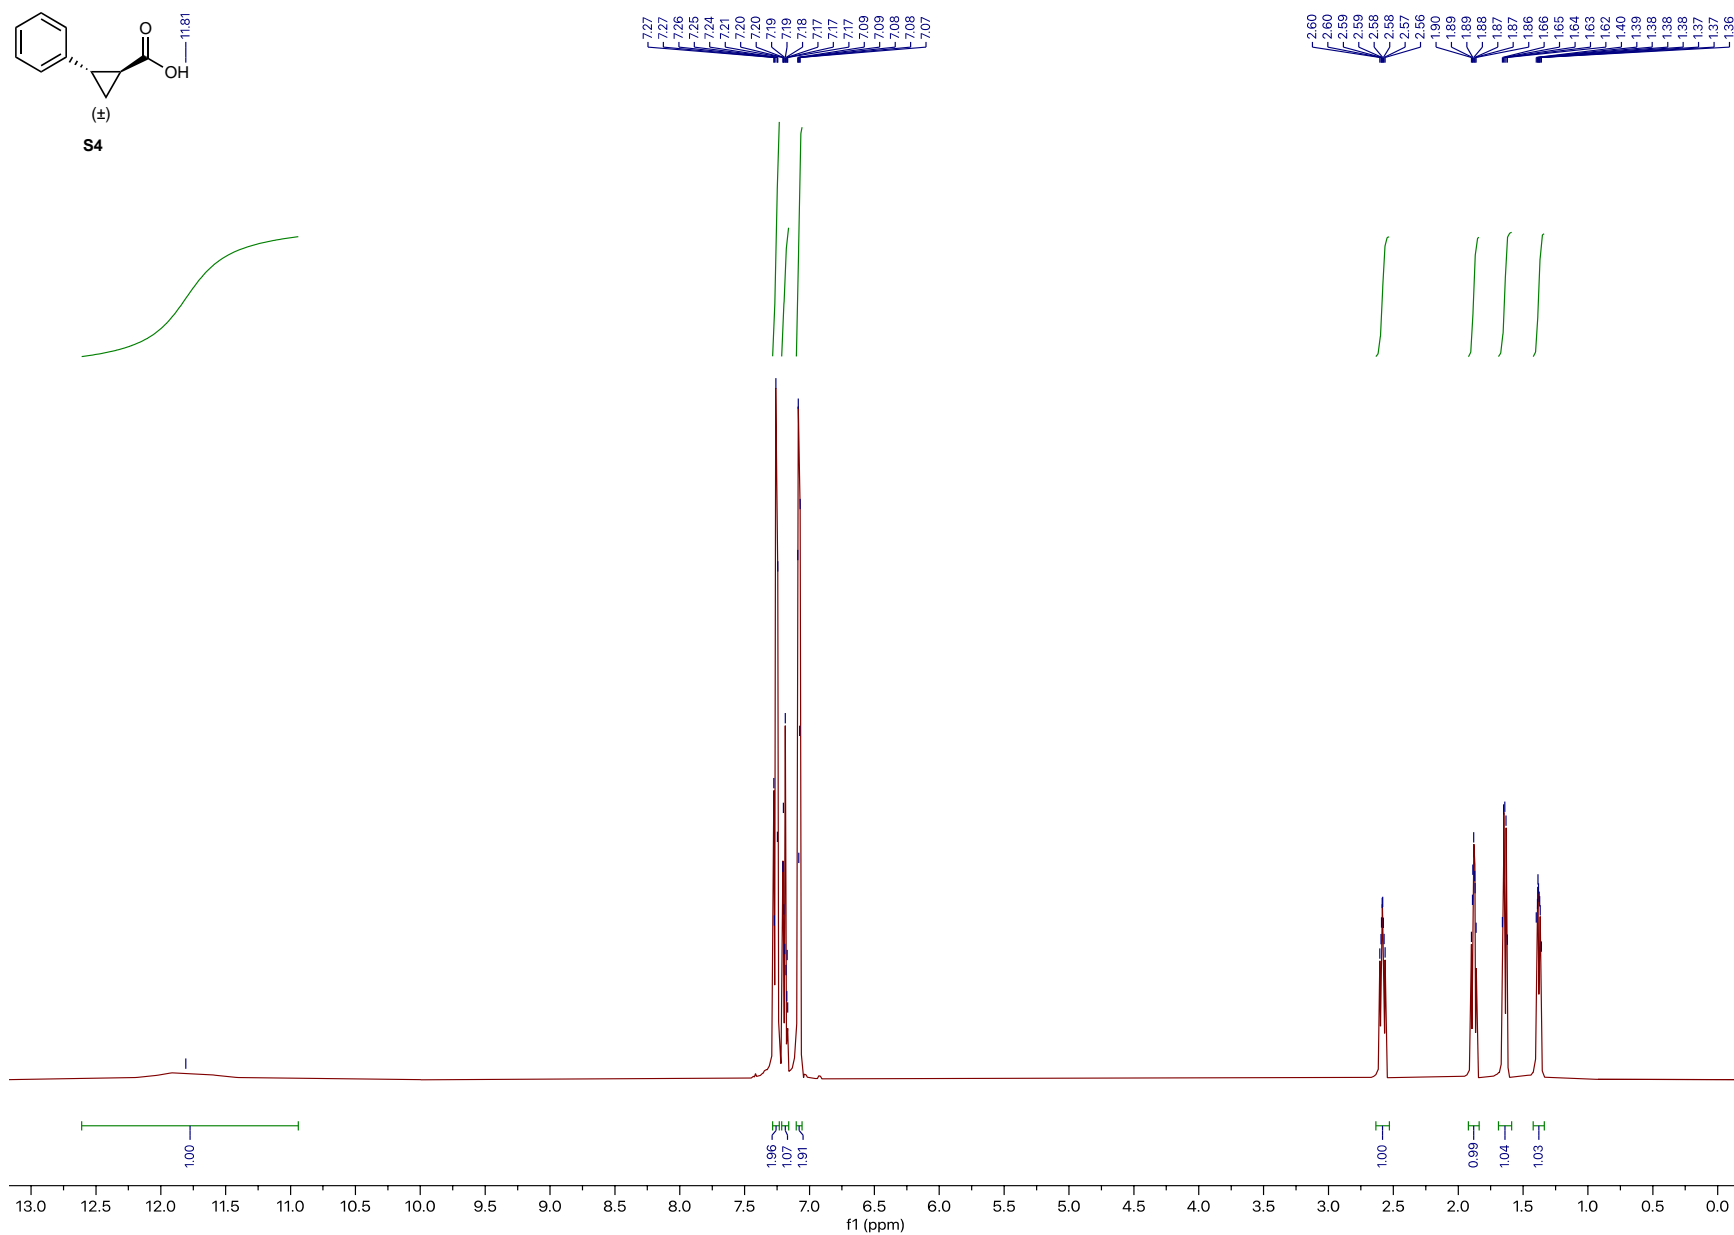

Supplementary Fig. 8 | <sup>1</sup>H-NMR (500 MHz, CDCl<sub>3</sub>) of S4.

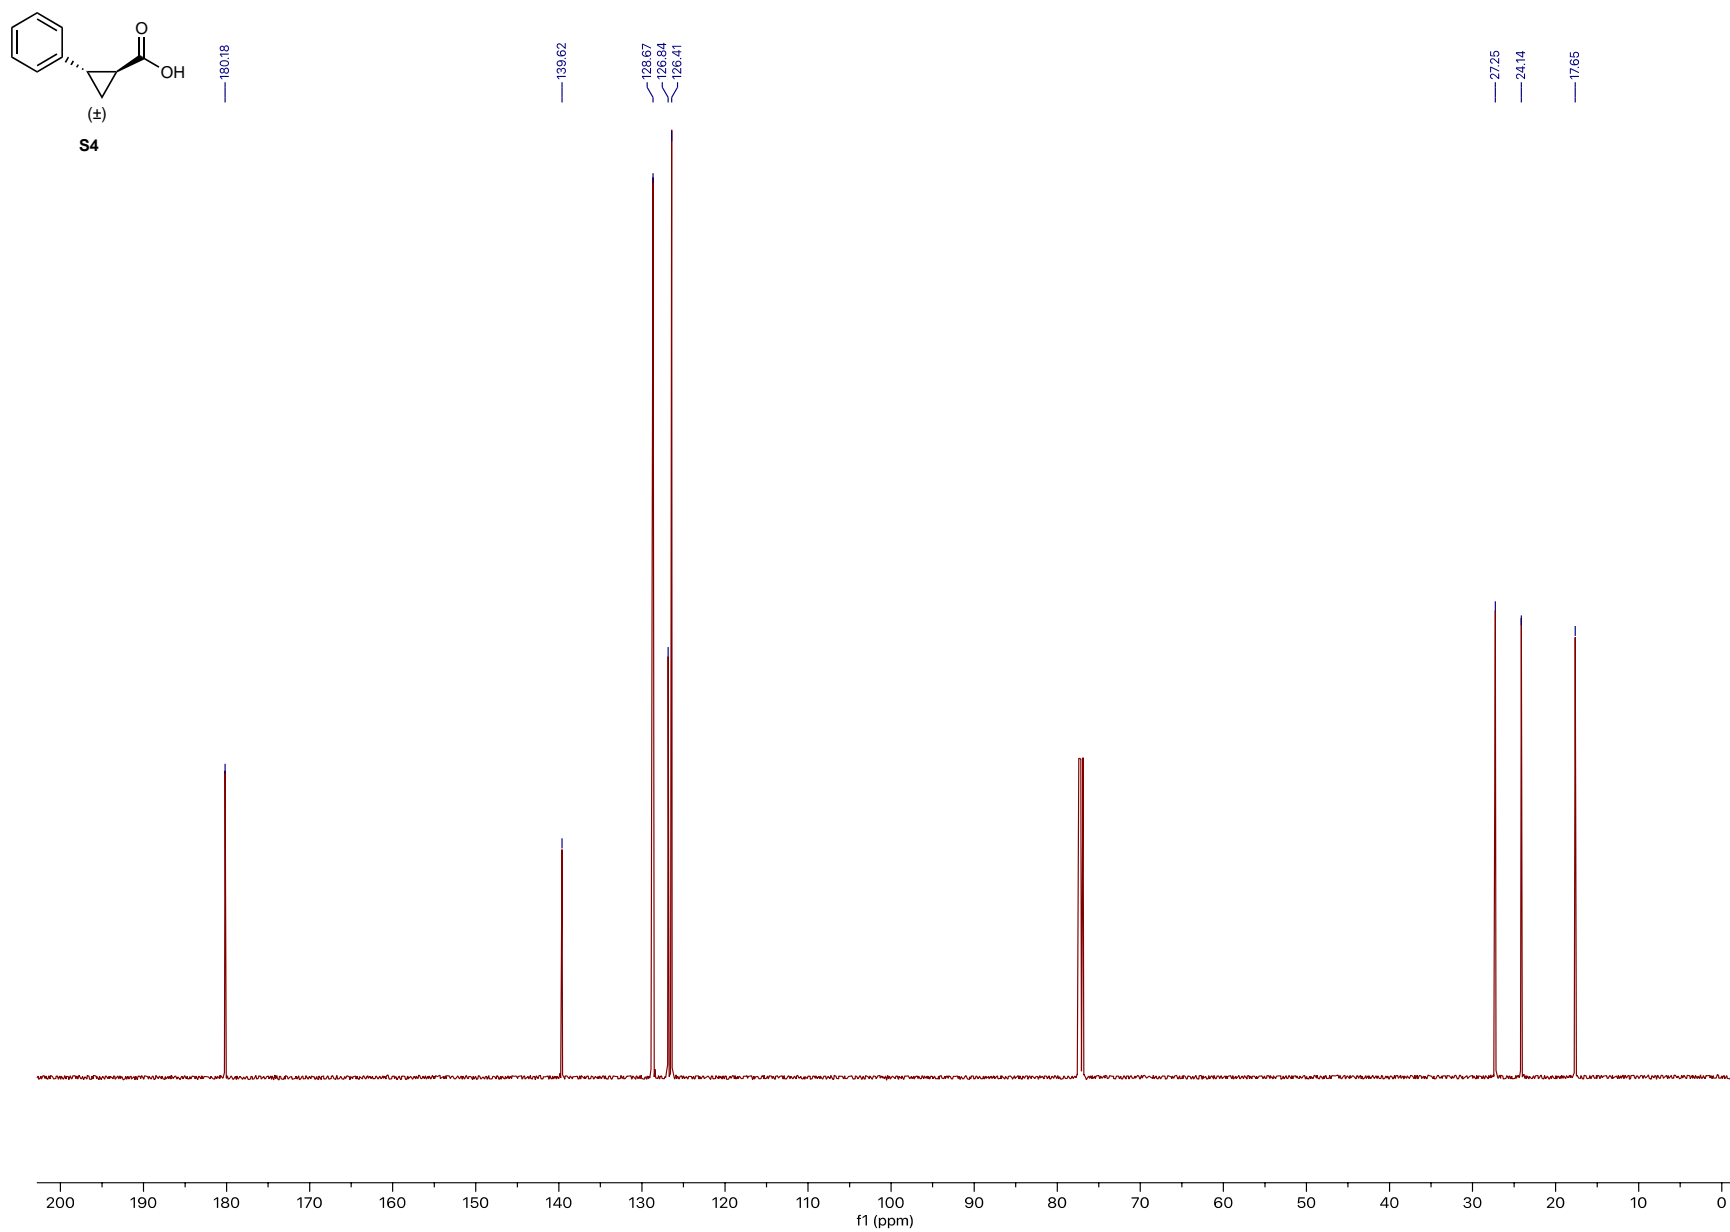

Supplementary Fig. 9 | <sup>13</sup>C-NMR (126 MHz, CDCl<sub>3</sub>) of S4.



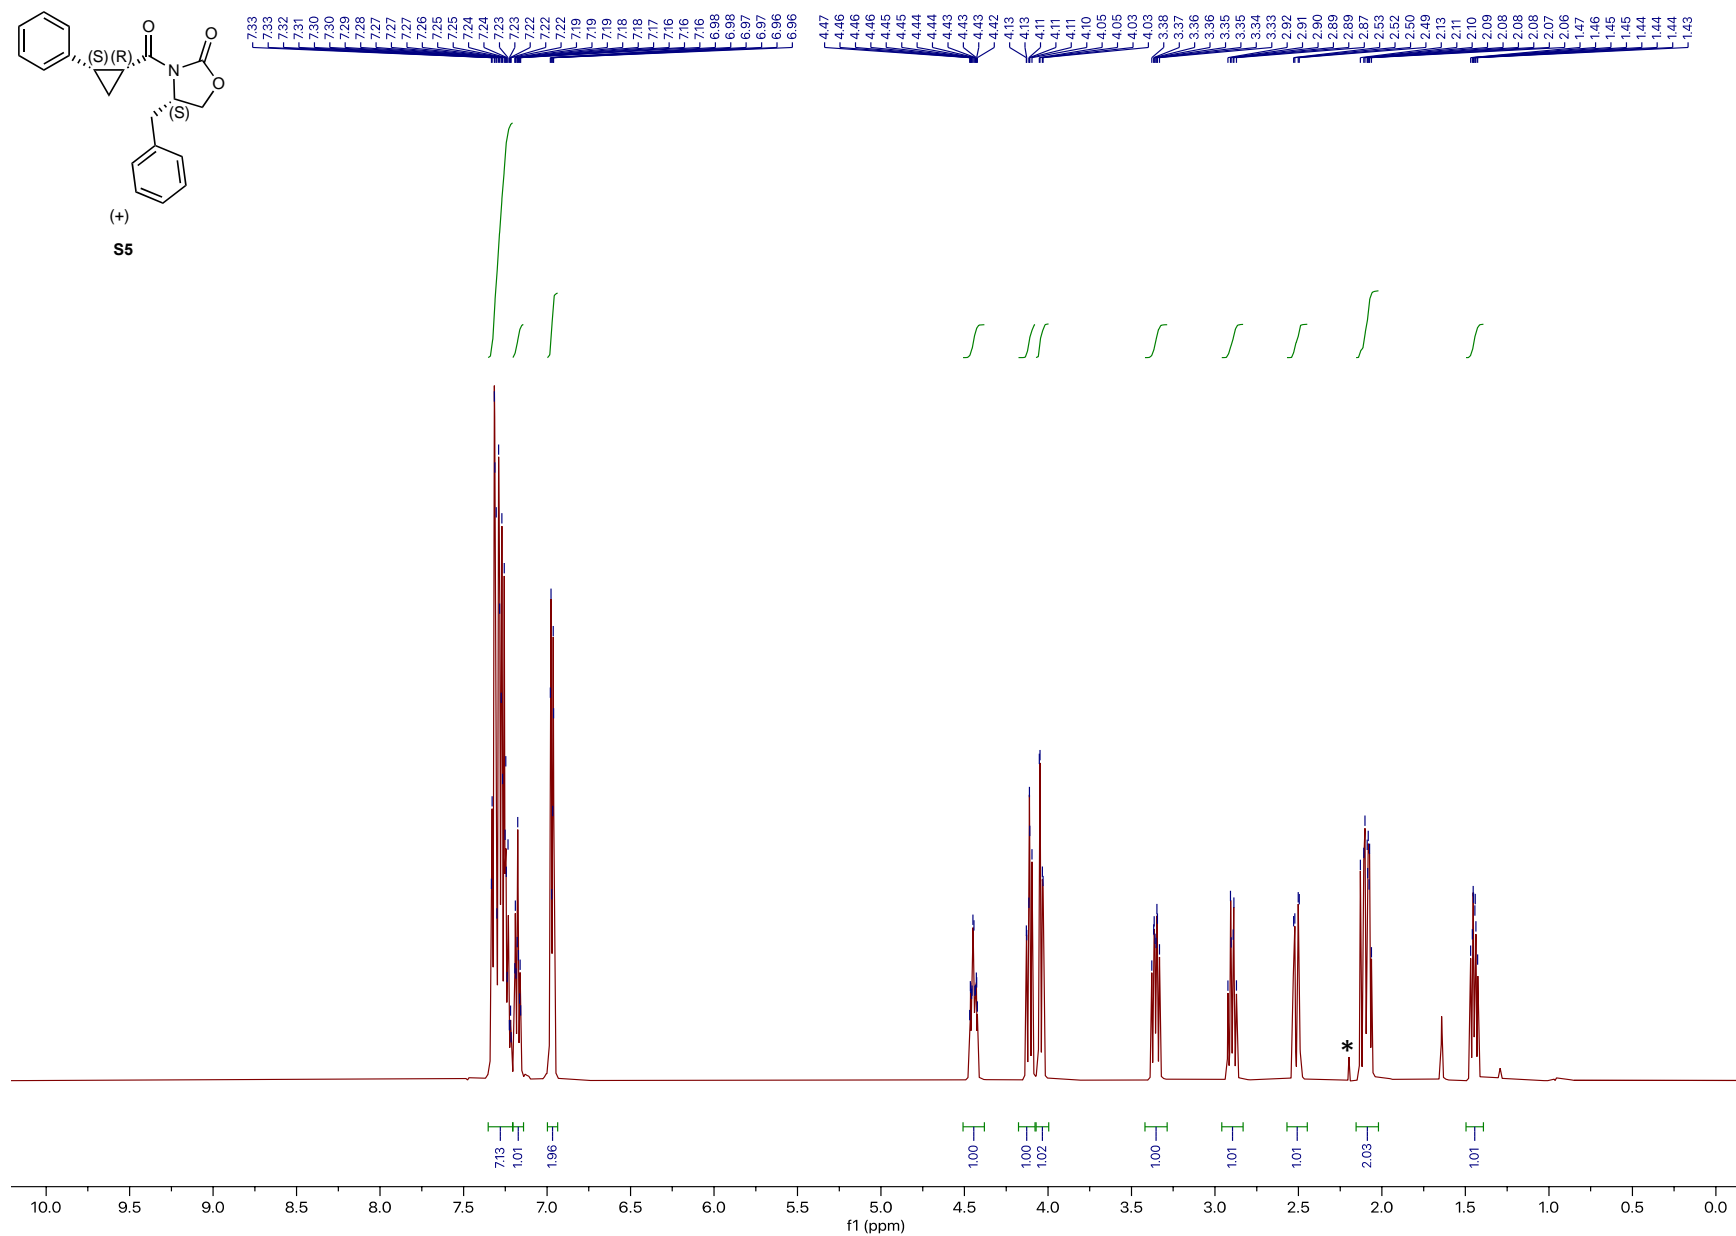

Supplementary Fig. 10 | <sup>1</sup>H-NMR (500 MHz, CDCl<sub>3</sub>) of S5. \*Impurity the result of acetone.

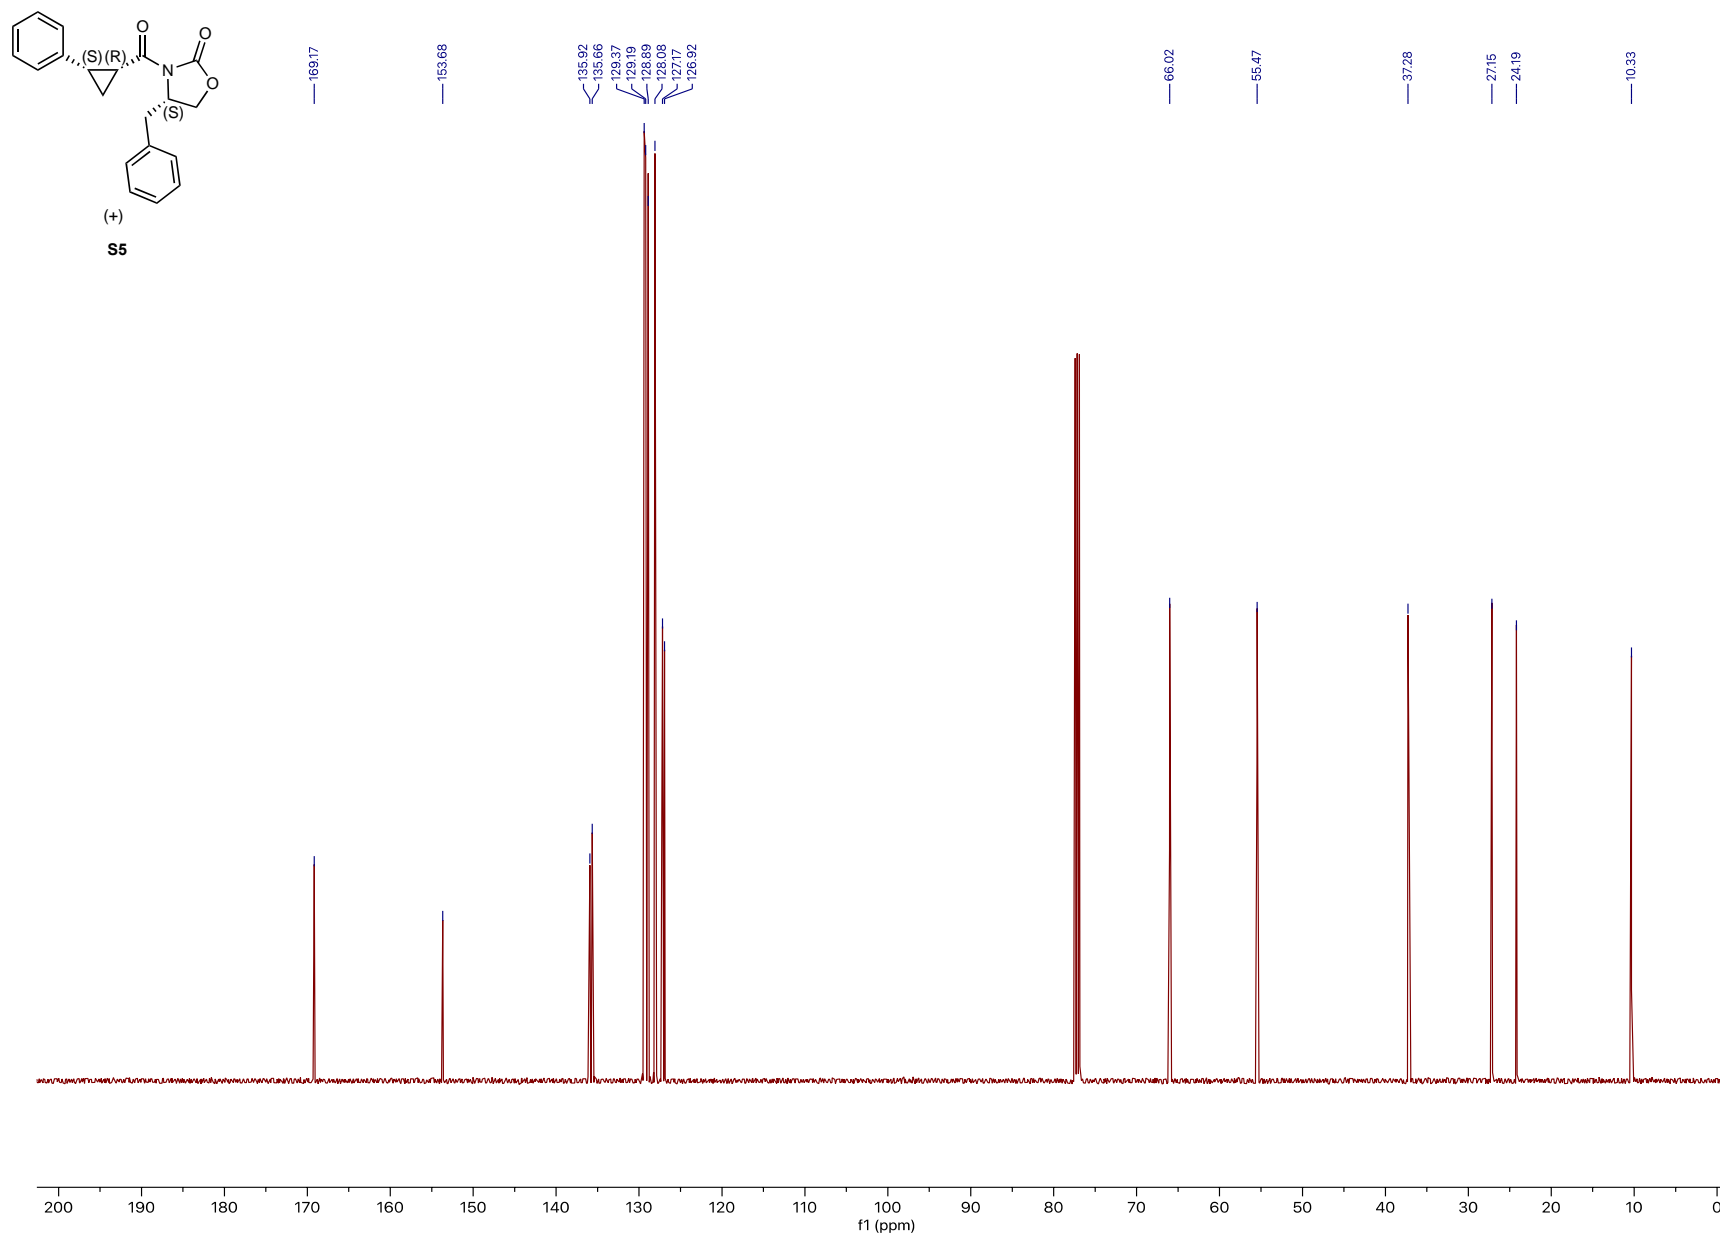

Supplementary Fig. 11 |  $^{13}\text{C}$ -NMR (126 MHz,  $\text{CDCl}_3$ ) of S5.

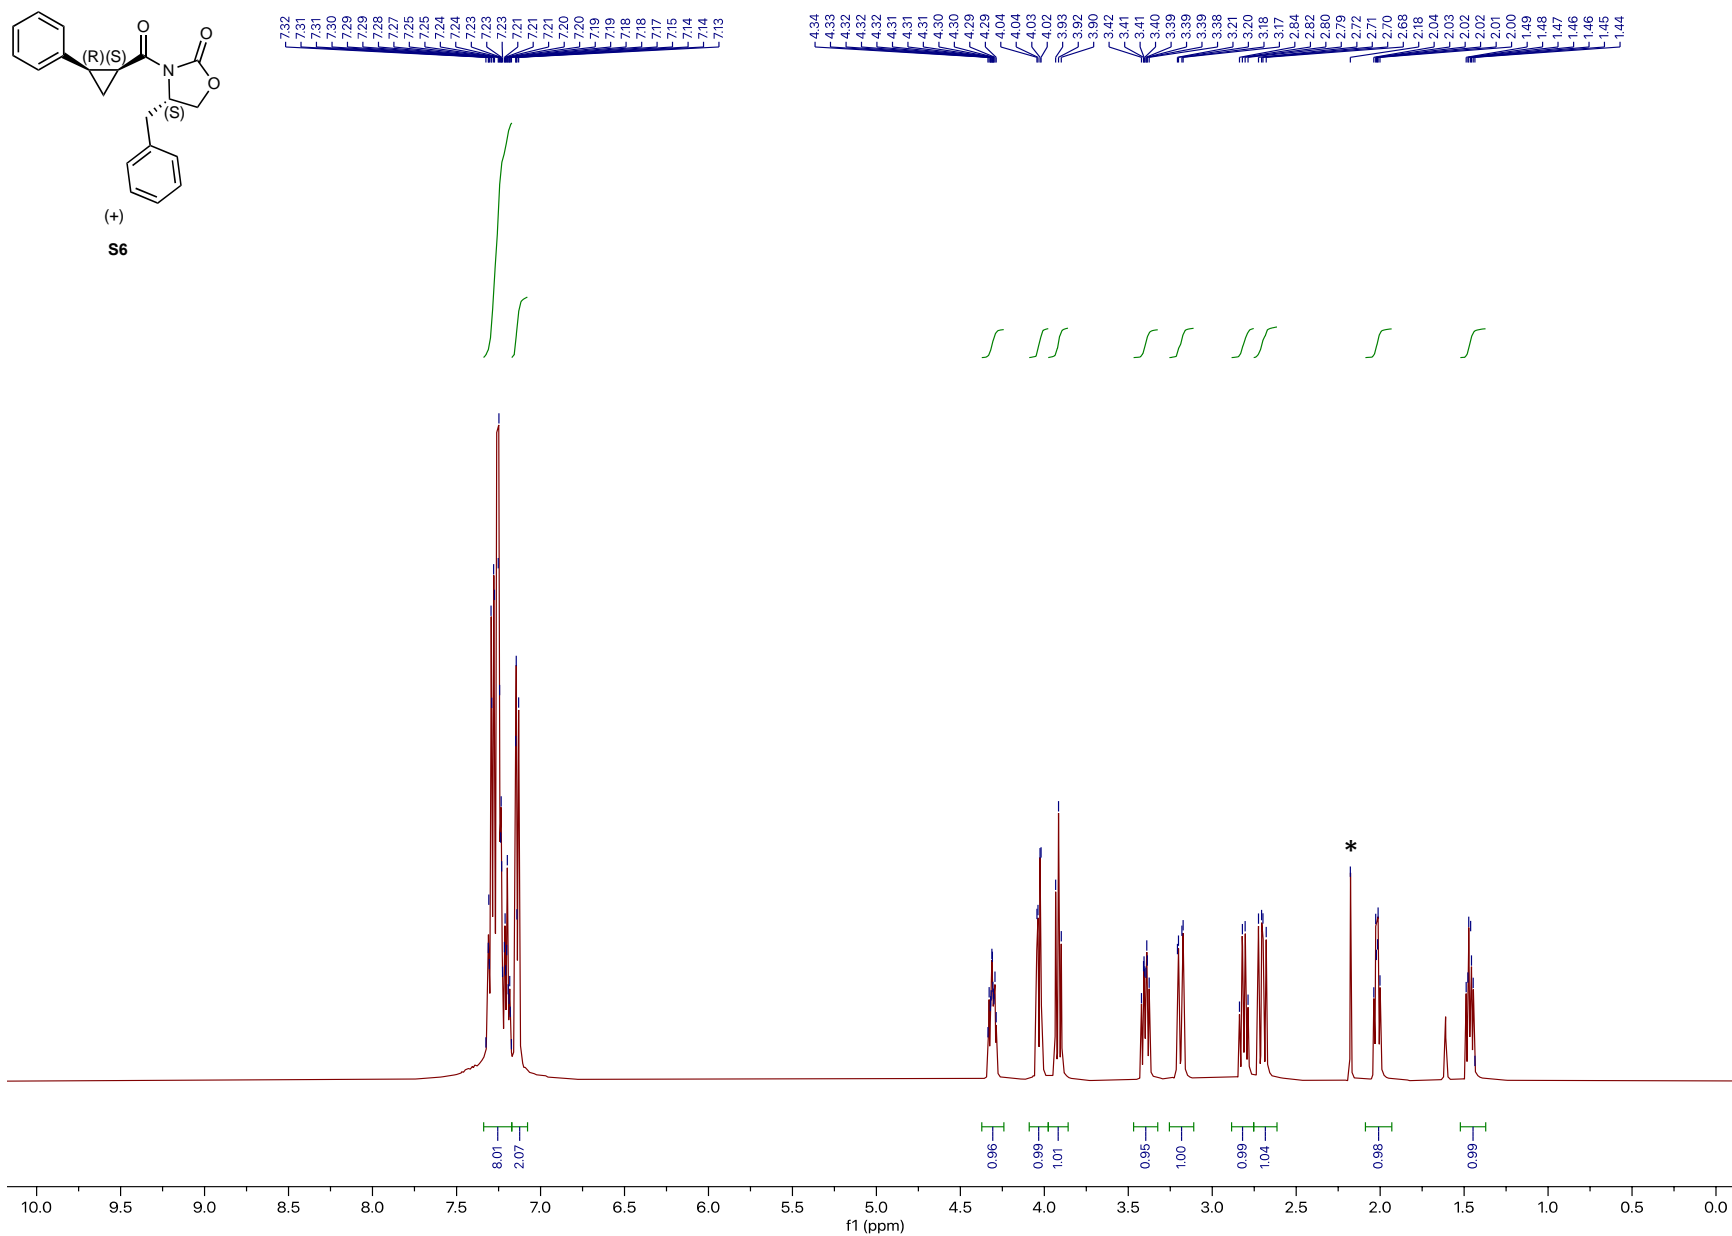

Supplementary Fig. 12 | <sup>1</sup>H-NMR (500 MHz, CDCl<sub>3</sub>) of S6. \*Impurity the result of acetone.

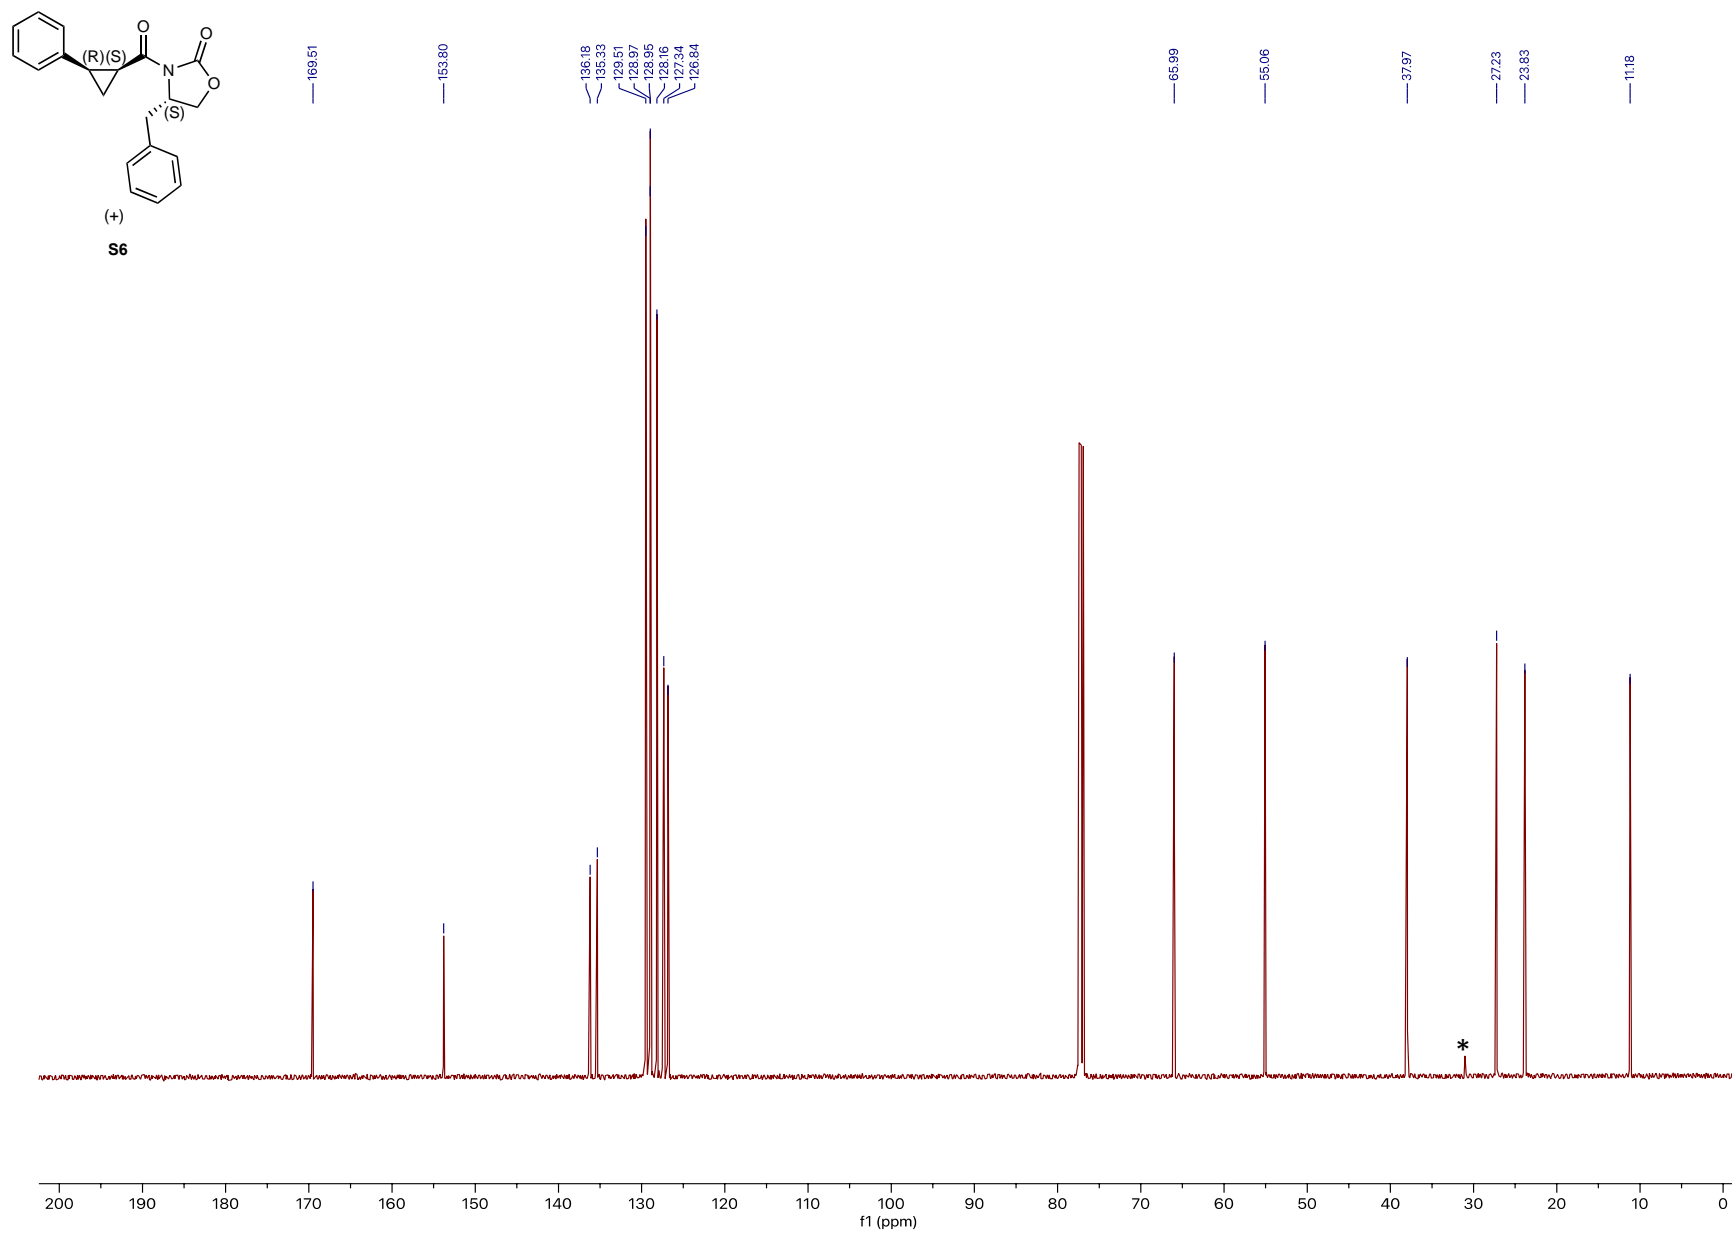

Supplementary Fig. 13 |  $^{13}\text{C}$ -NMR (126 MHz,  $\text{CDCl}_3$ ) of S6. \*Impurity the result of acetone.

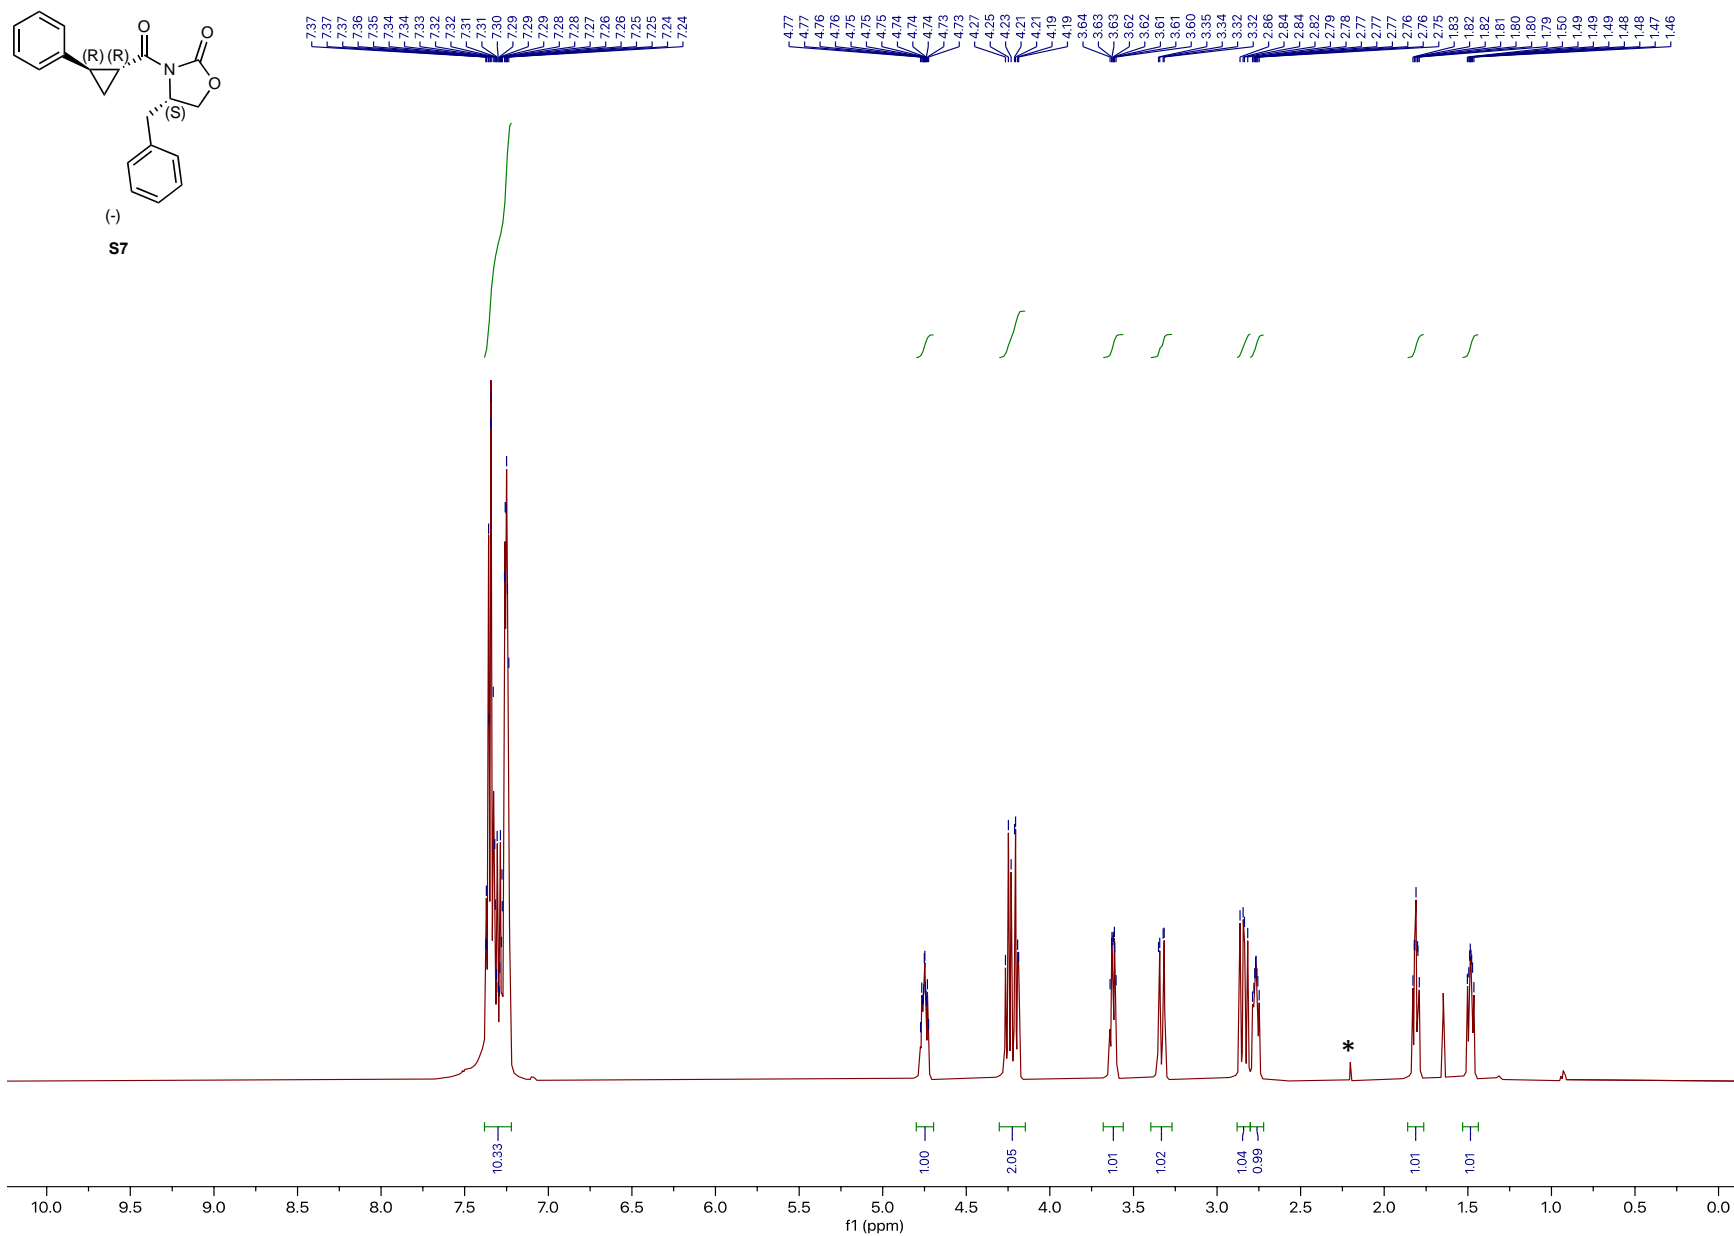

Supplementary Fig. 14 | <sup>1</sup>H-NMR (500 MHz, CDCl<sub>3</sub>) of S7. \*Impurity the result of acetone.

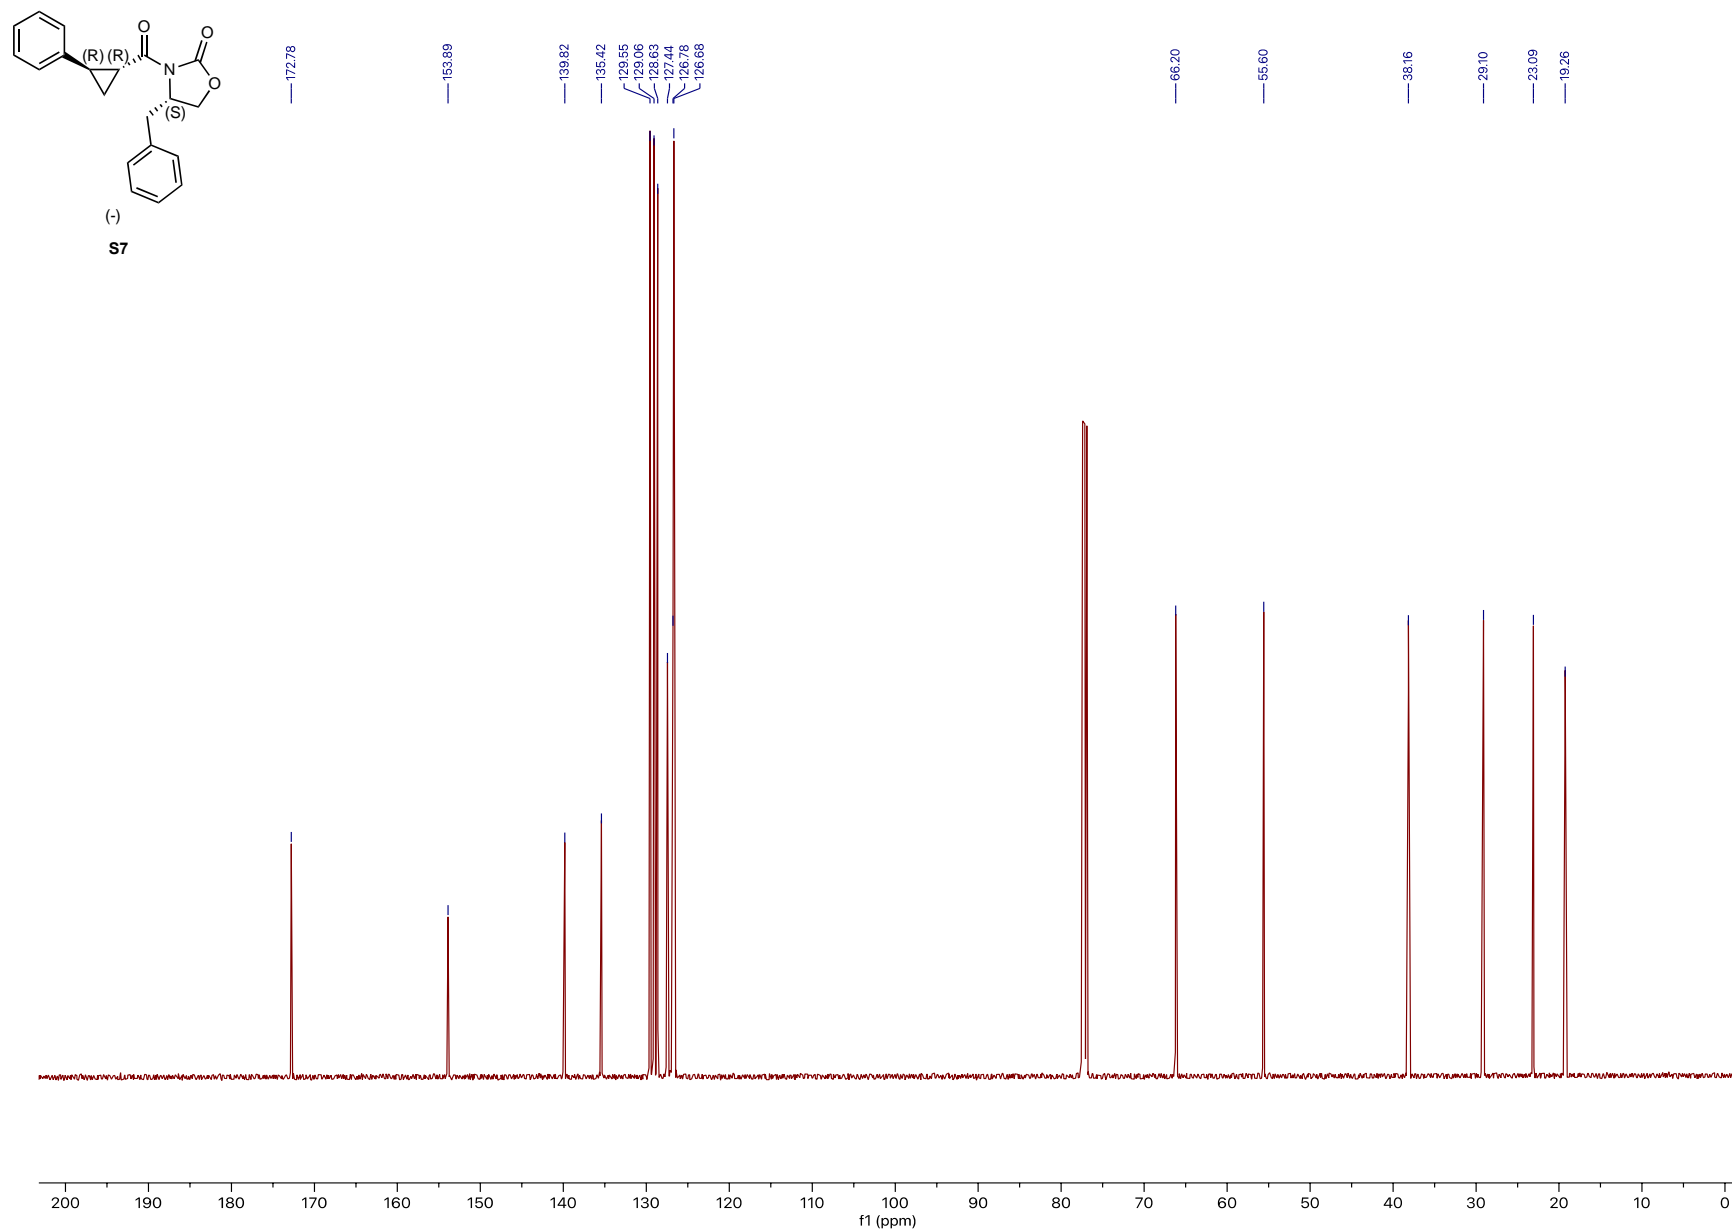

Supplementary Fig. 15 |  $^{13}\text{C}$ -NMR (126 MHz,  $\text{CDCl}_3$ ) of **S7**.

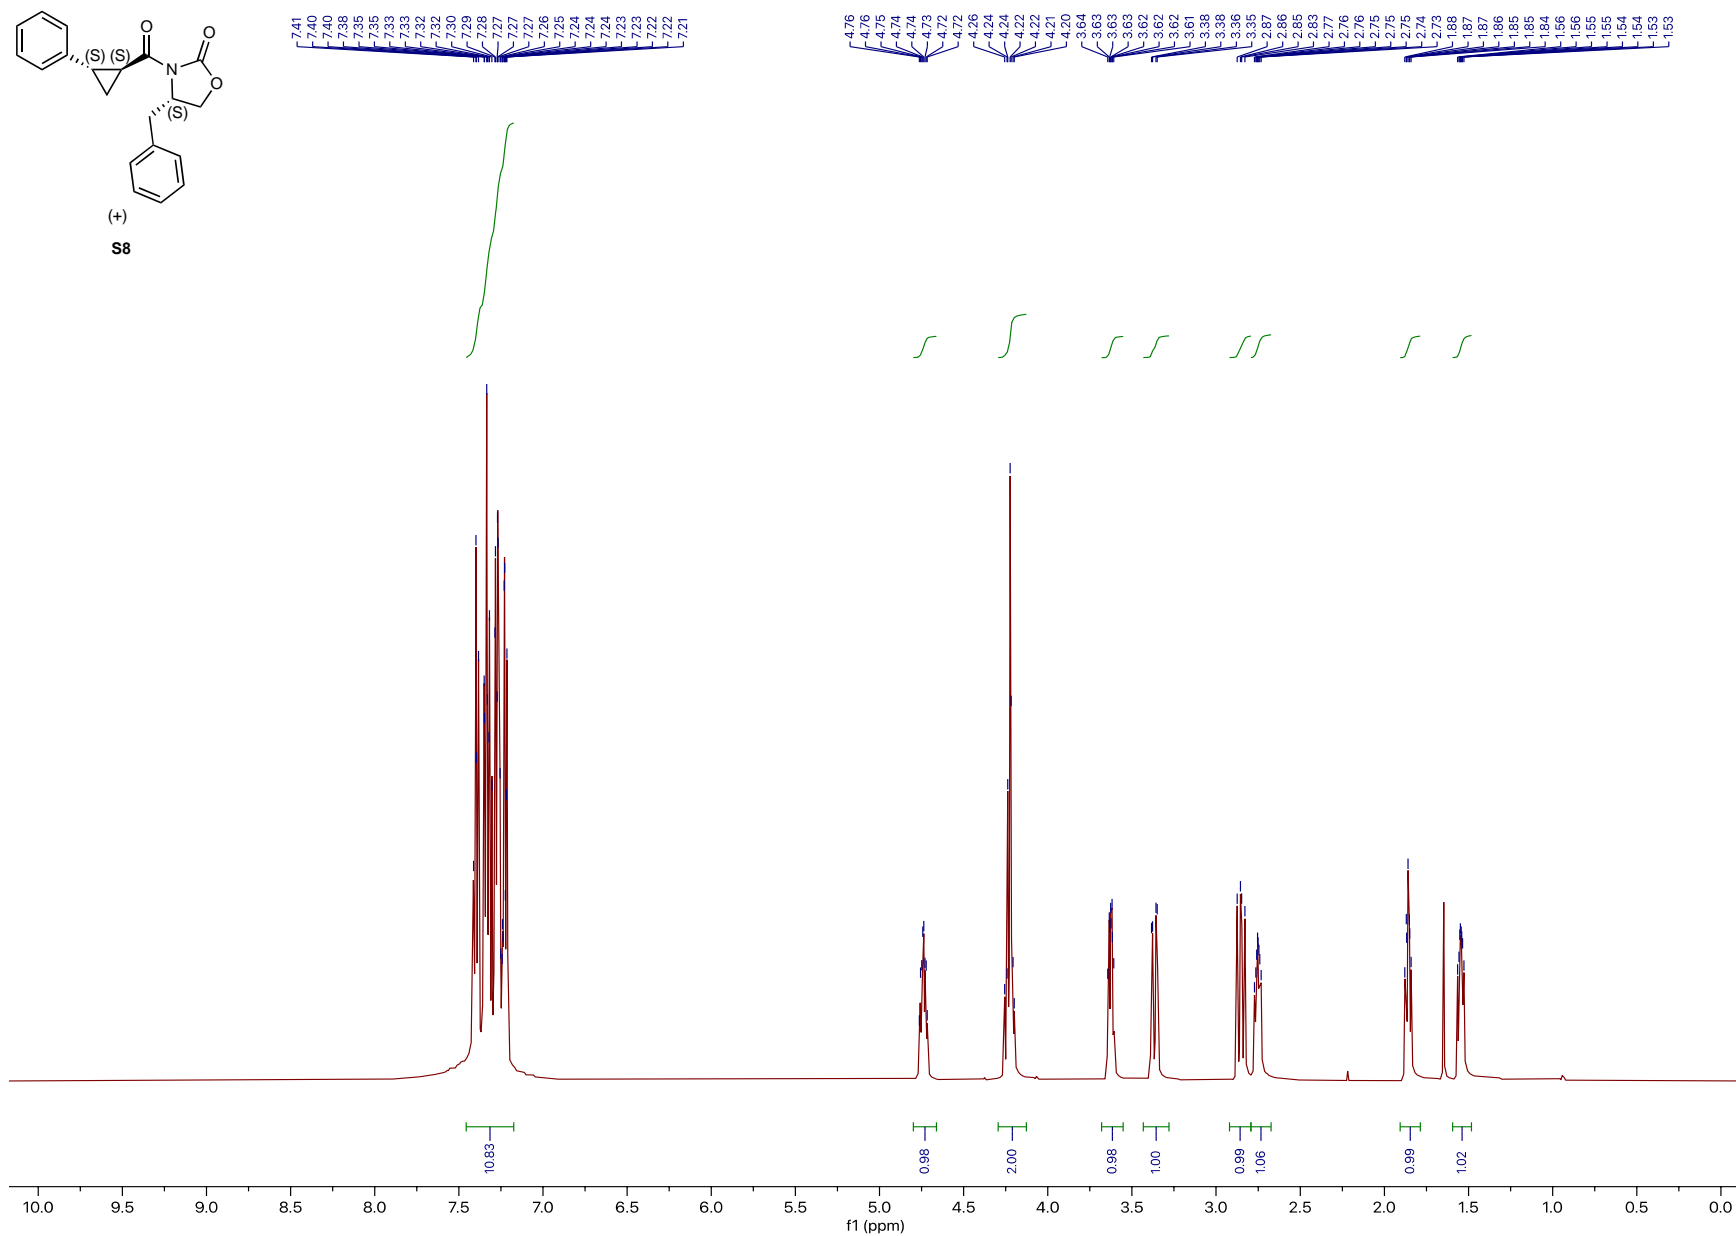

Supplementary Fig. 16 | <sup>1</sup>H-NMR (500 MHz, CDCl<sub>3</sub>) of S8.

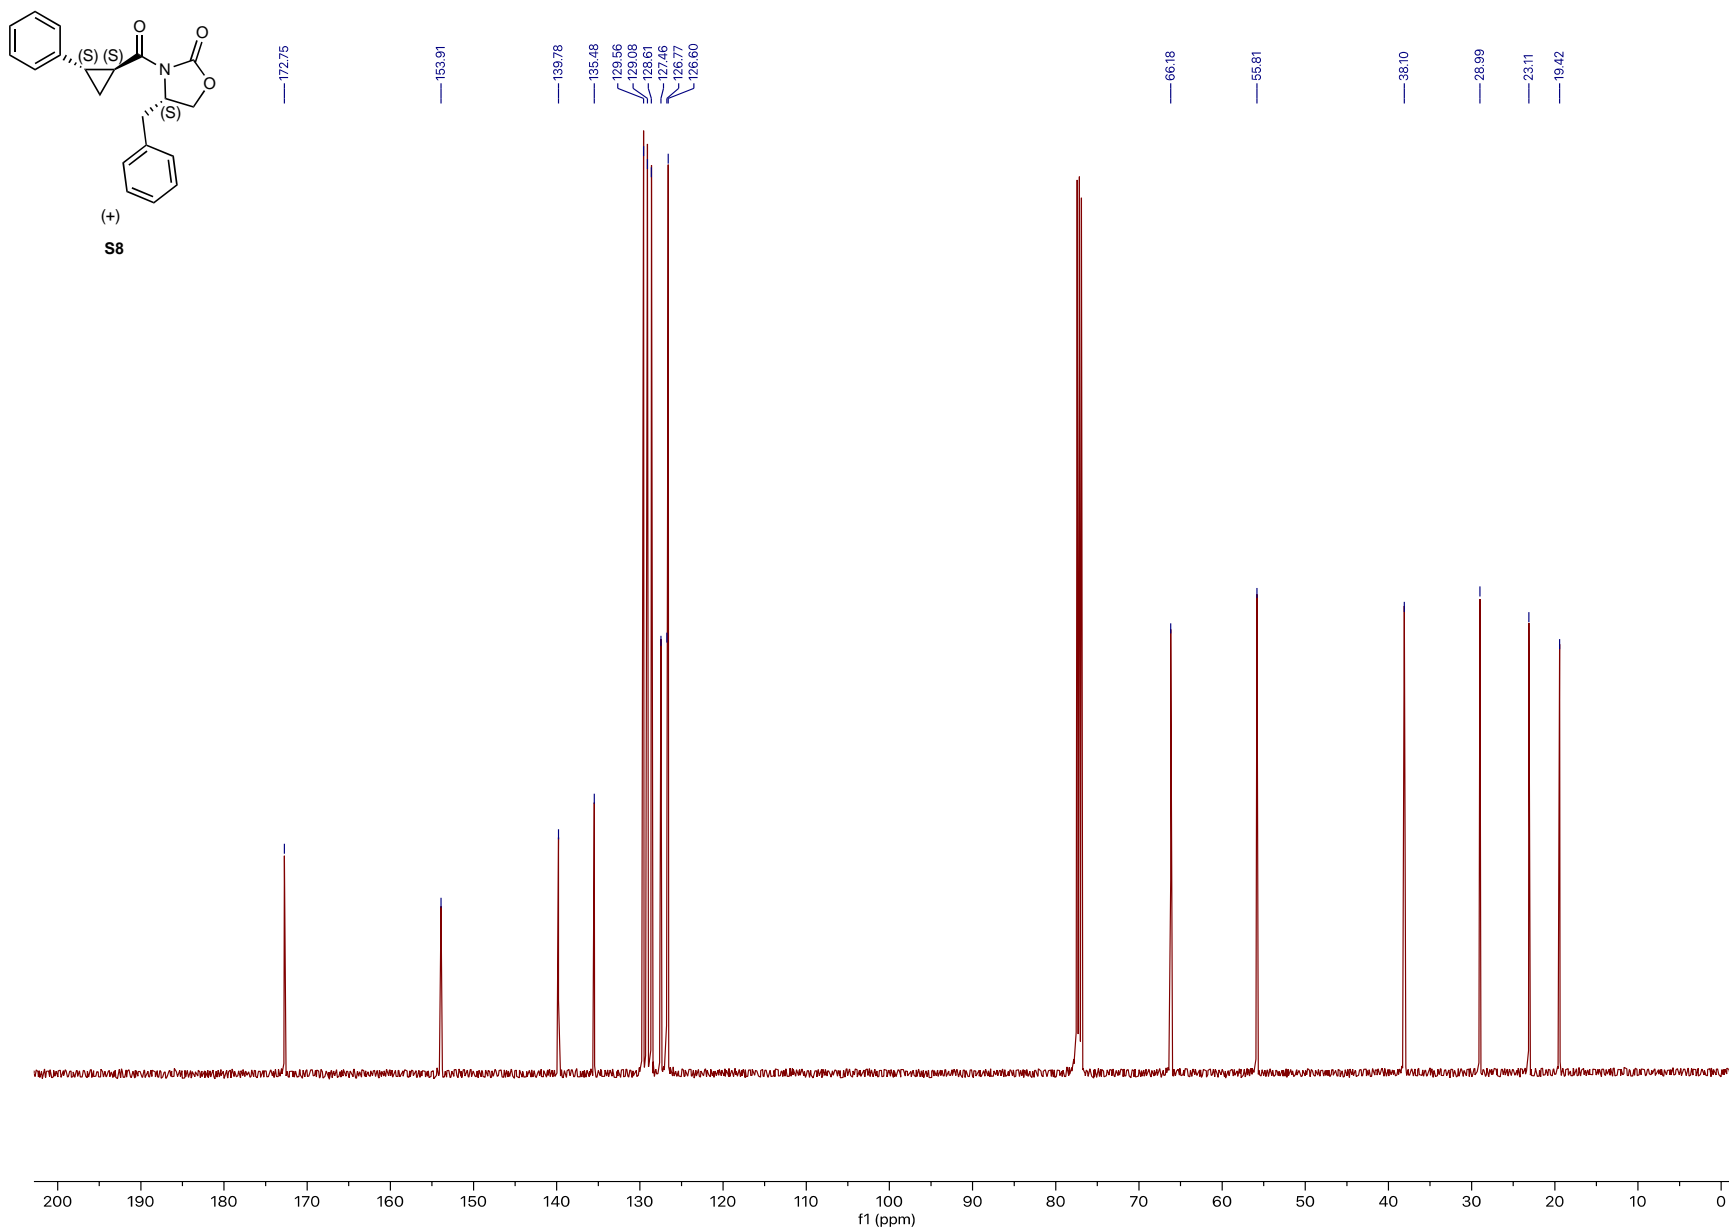

Supplementary Fig. 17 |  $^{13}\text{C}$ -NMR (126 MHz,  $\text{CDCl}_3$ ) of S8.



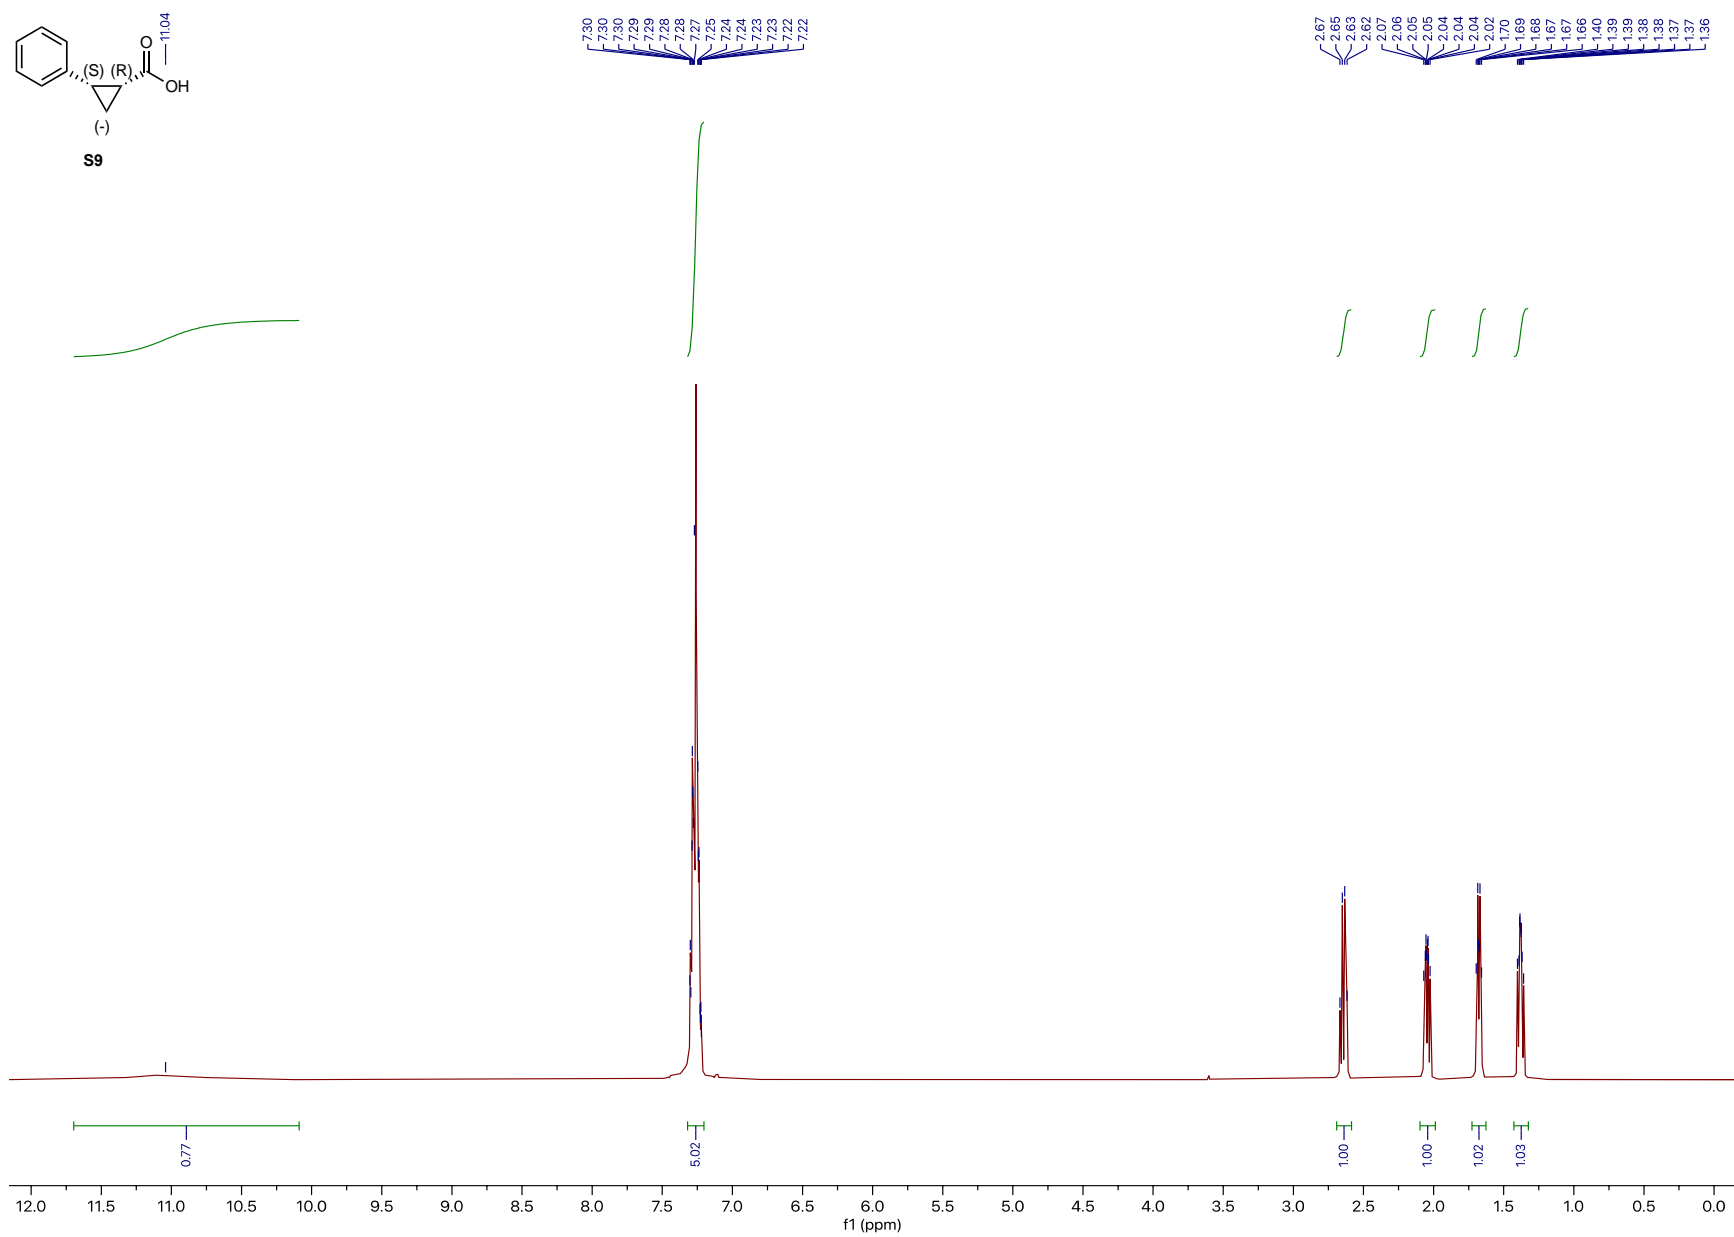

Supplementary Fig. 18 | <sup>1</sup>H-NMR (500 MHz, CDCl<sub>3</sub>) of S9.

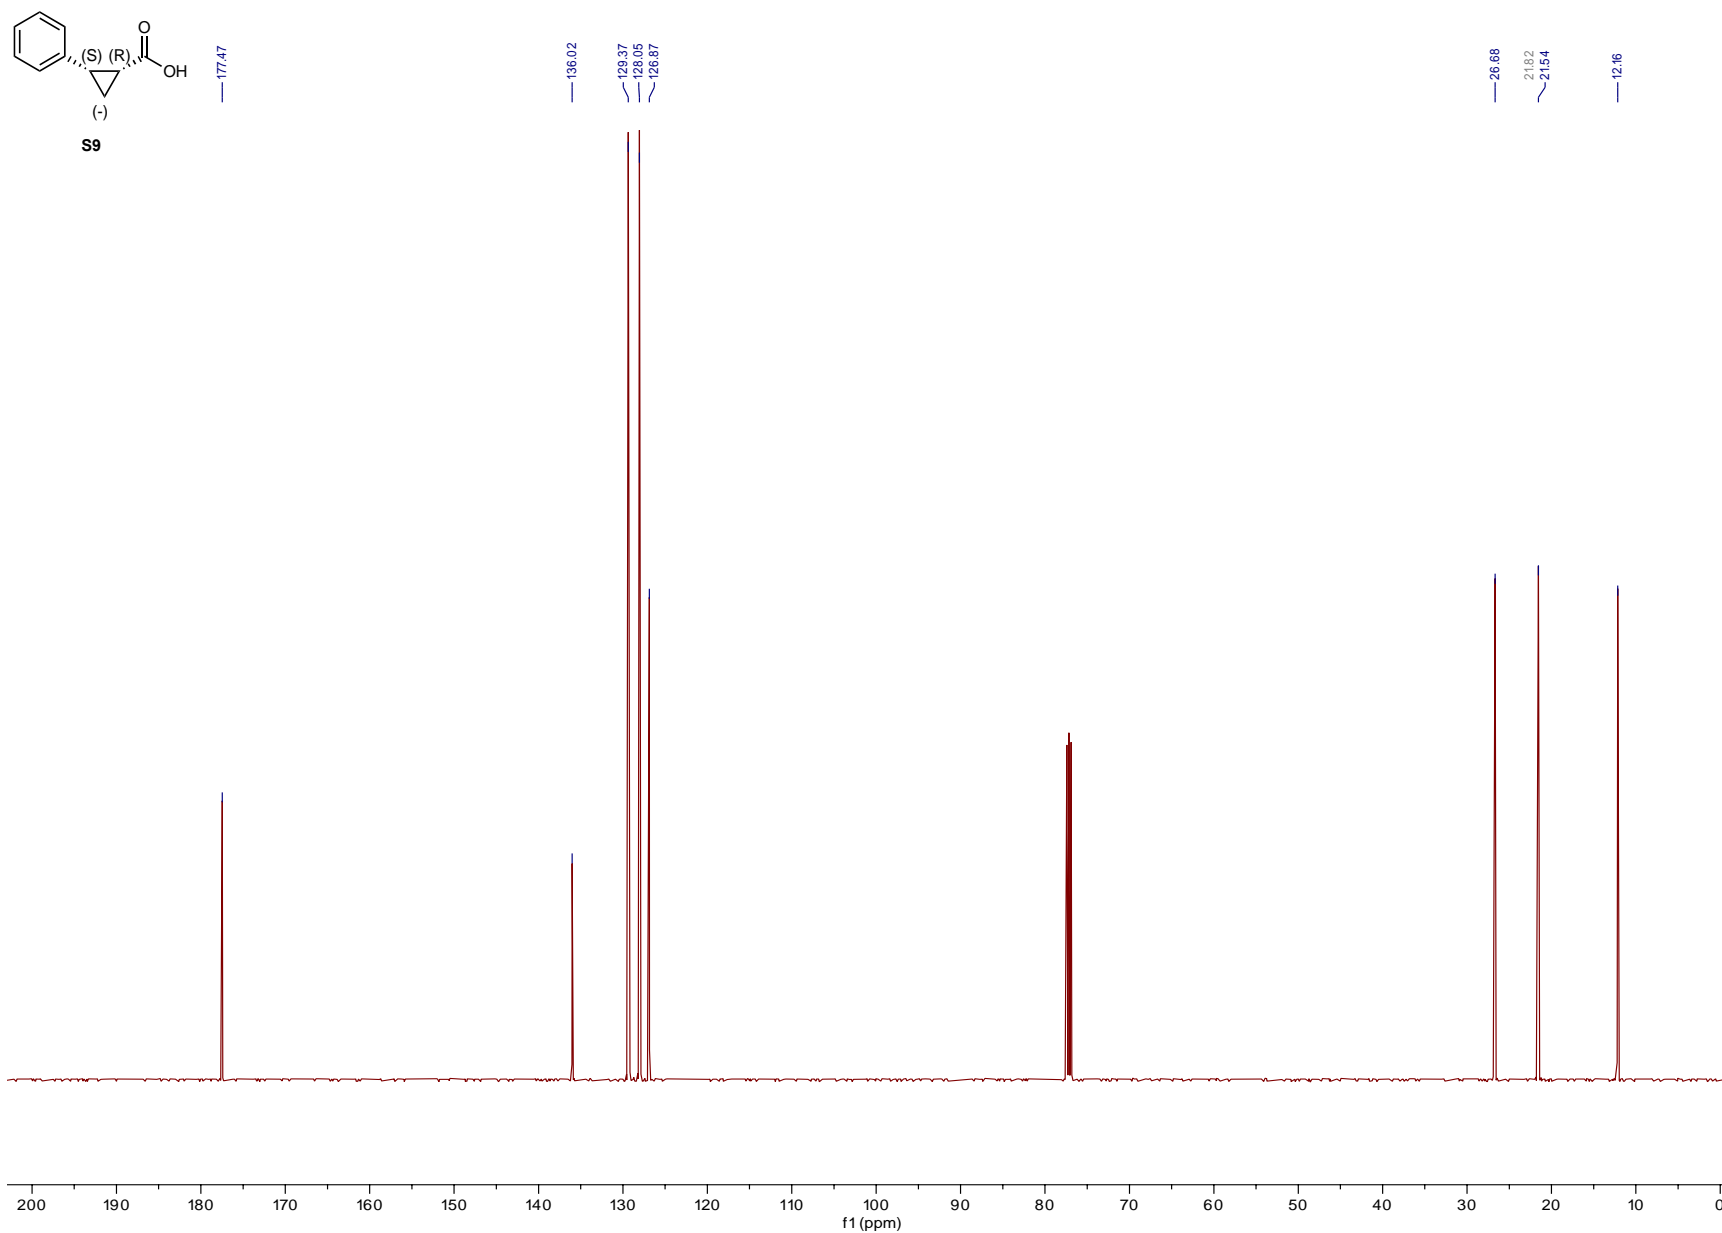

Supplementary Fig. 19 | <sup>13</sup>C-NMR (126 MHz, CDCl<sub>3</sub>) of S9.

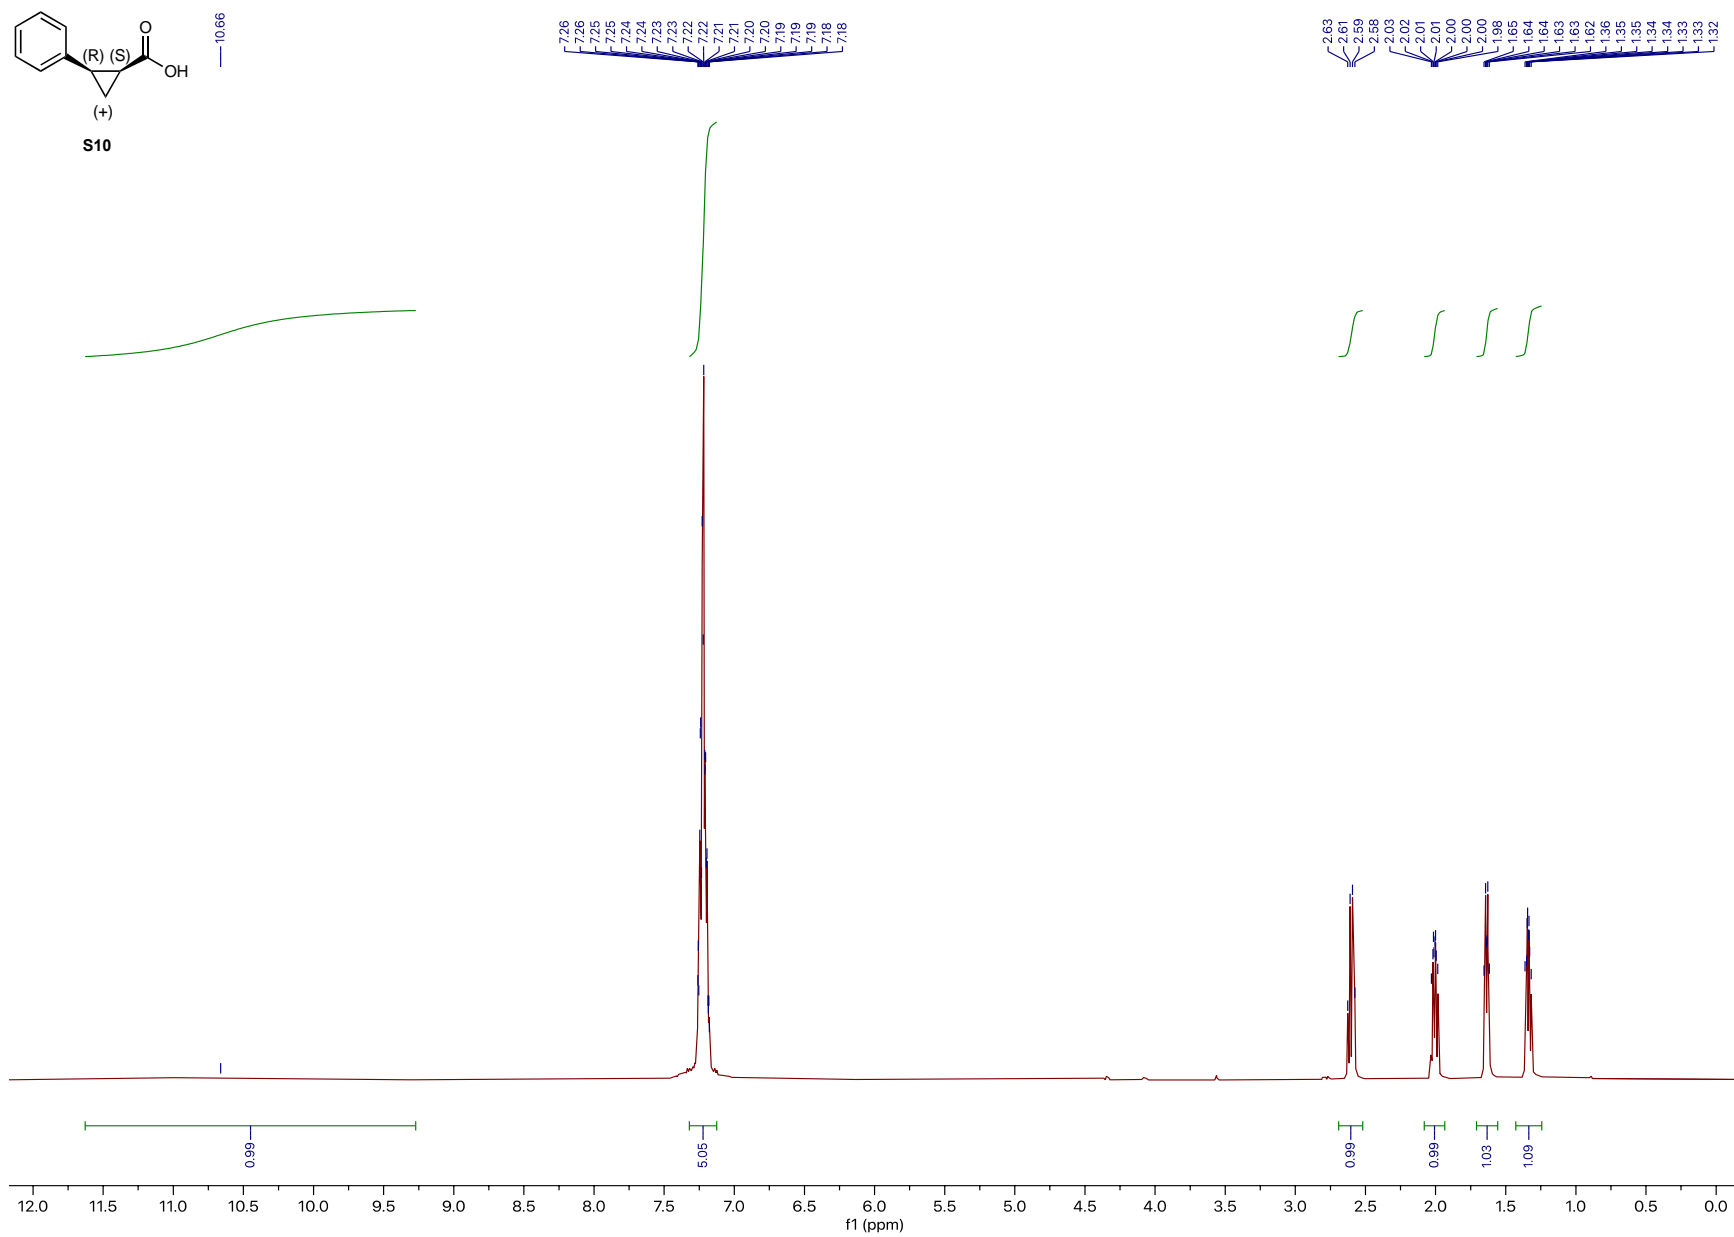

Supplementary Fig. 20 | <sup>1</sup>H-NMR (500 MHz, CDCl<sub>3</sub>) of S10.

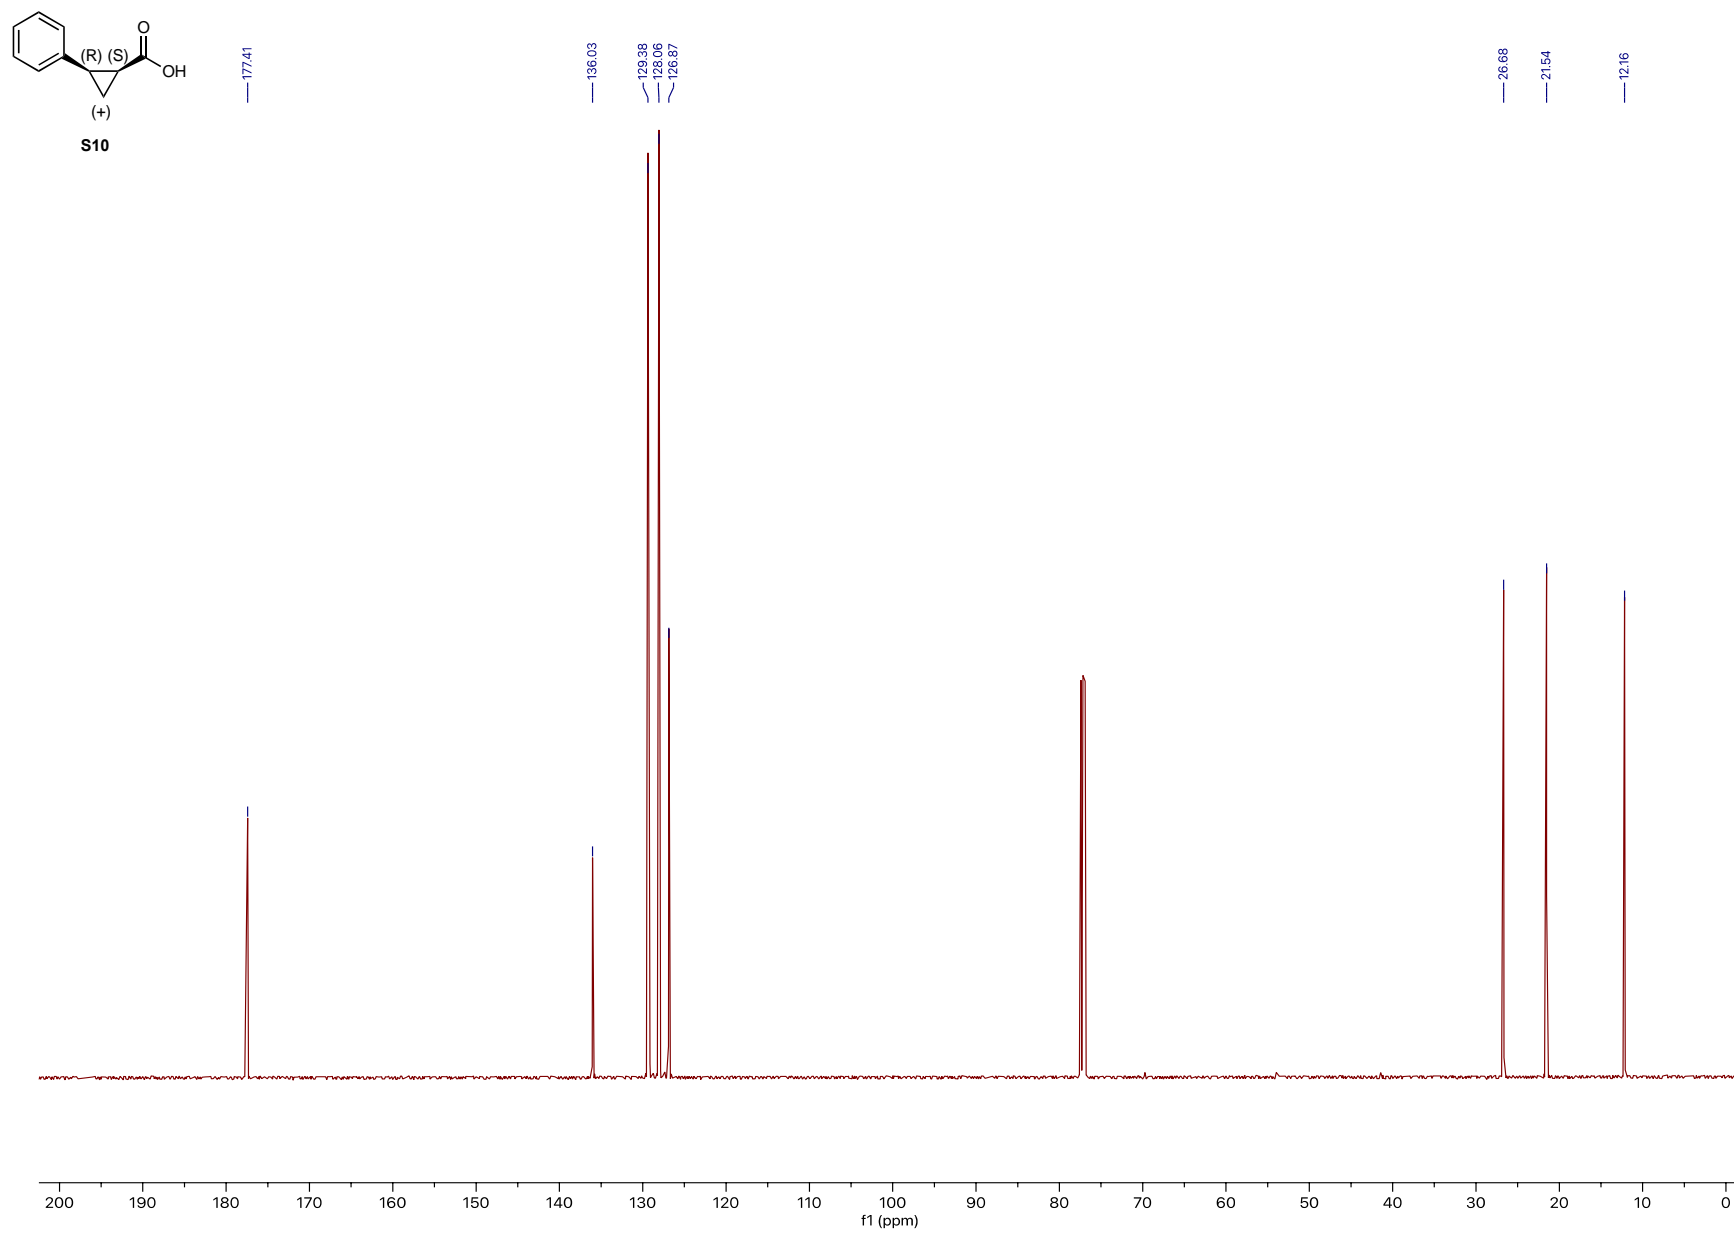

Supplementary Fig. 21 | <sup>13</sup>C-NMR (126 MHz, CDCl<sub>3</sub>) of S10.

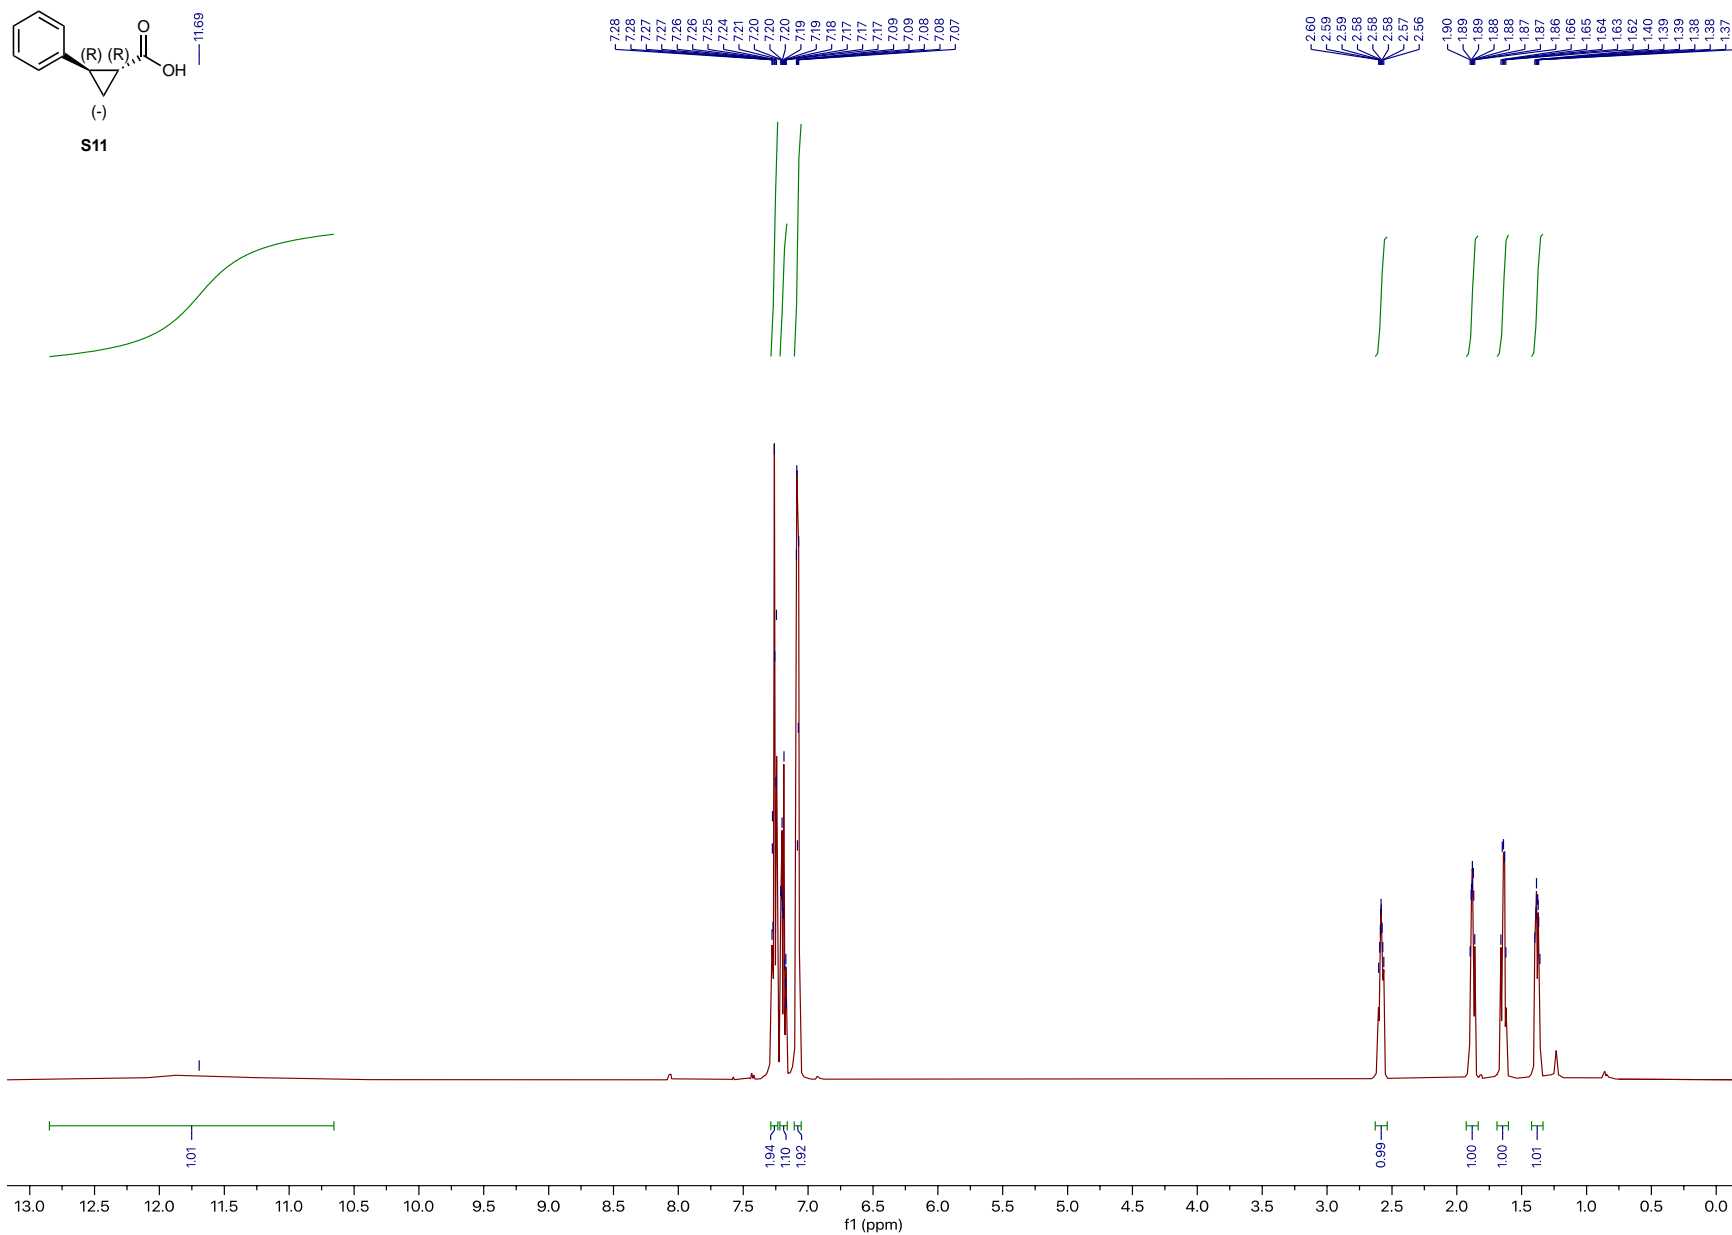

Supplementary Fig. 22 | <sup>1</sup>H-NMR (500 MHz, CDCl<sub>3</sub>) of S11.

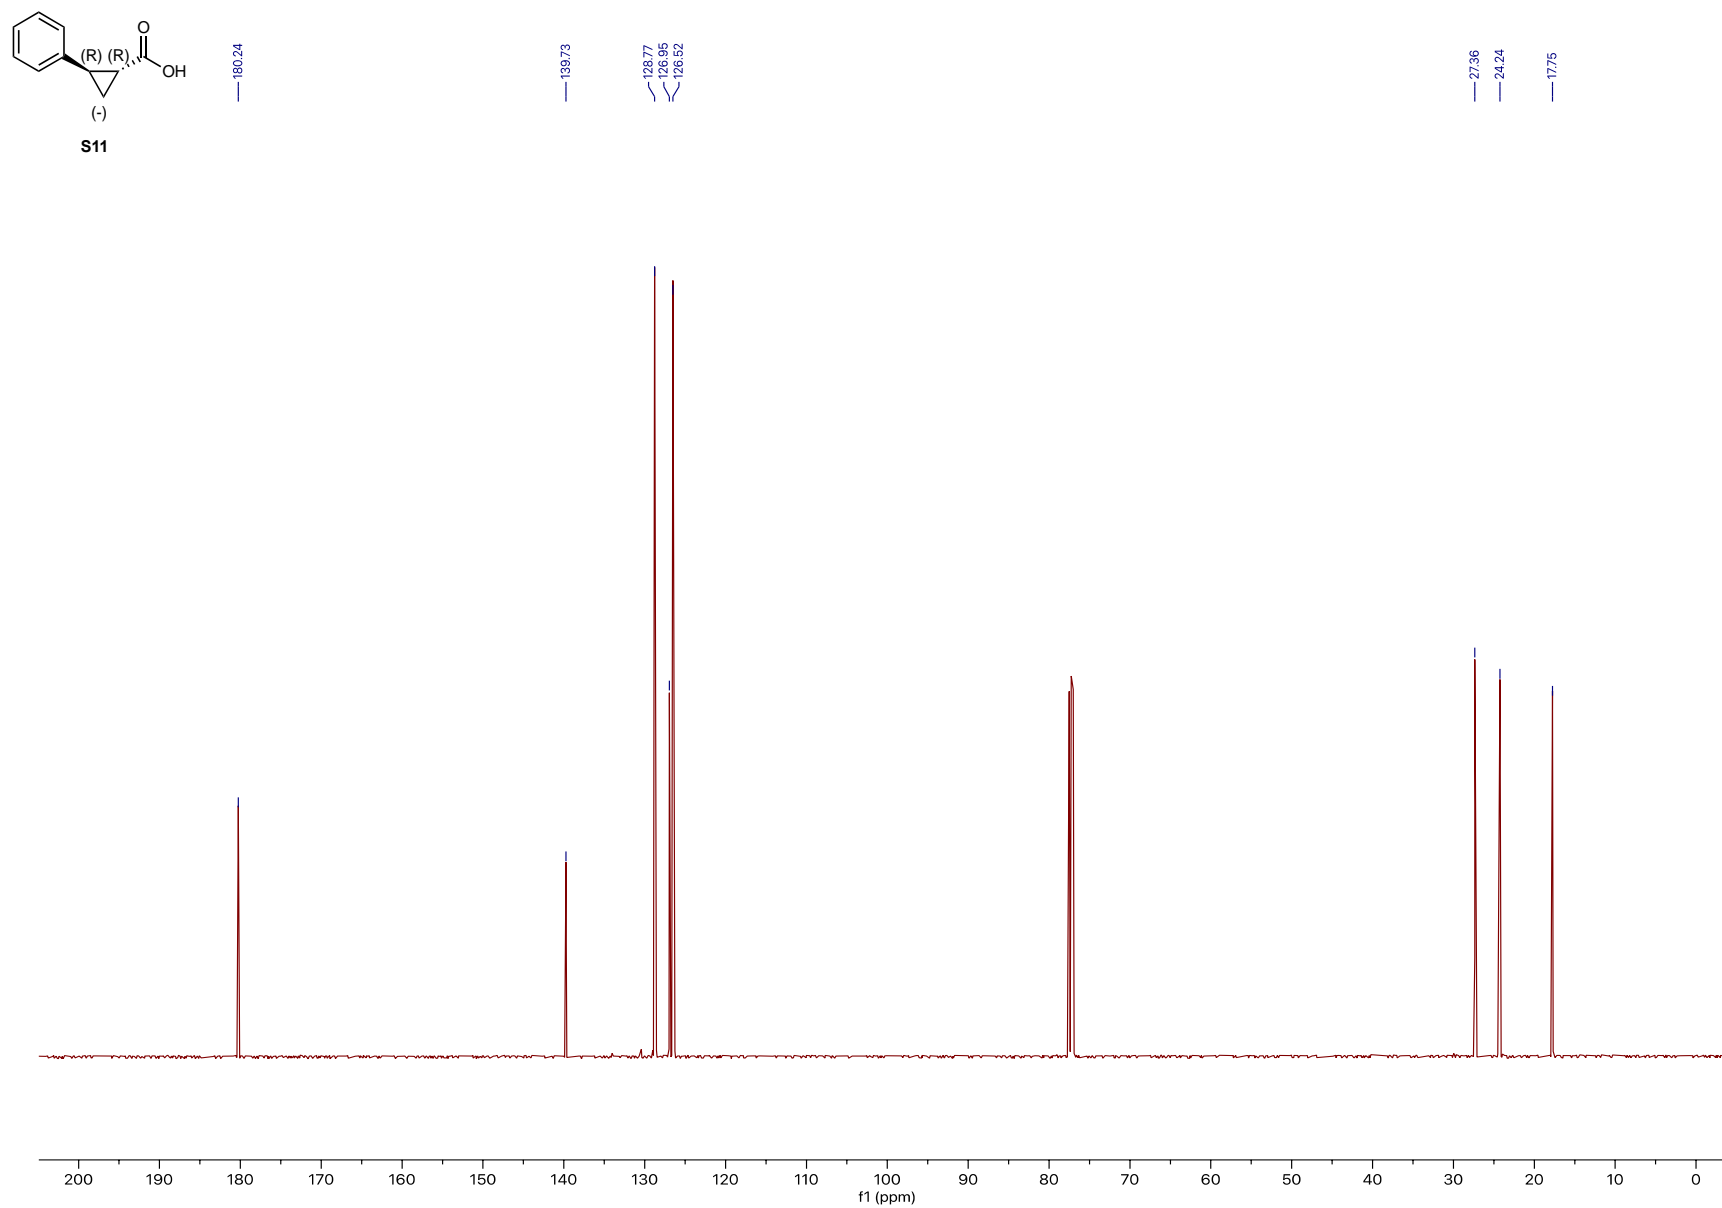

Supplementary Fig. 23 | <sup>13</sup>C-NMR (126 MHz, CDCl<sub>3</sub>) of S11.

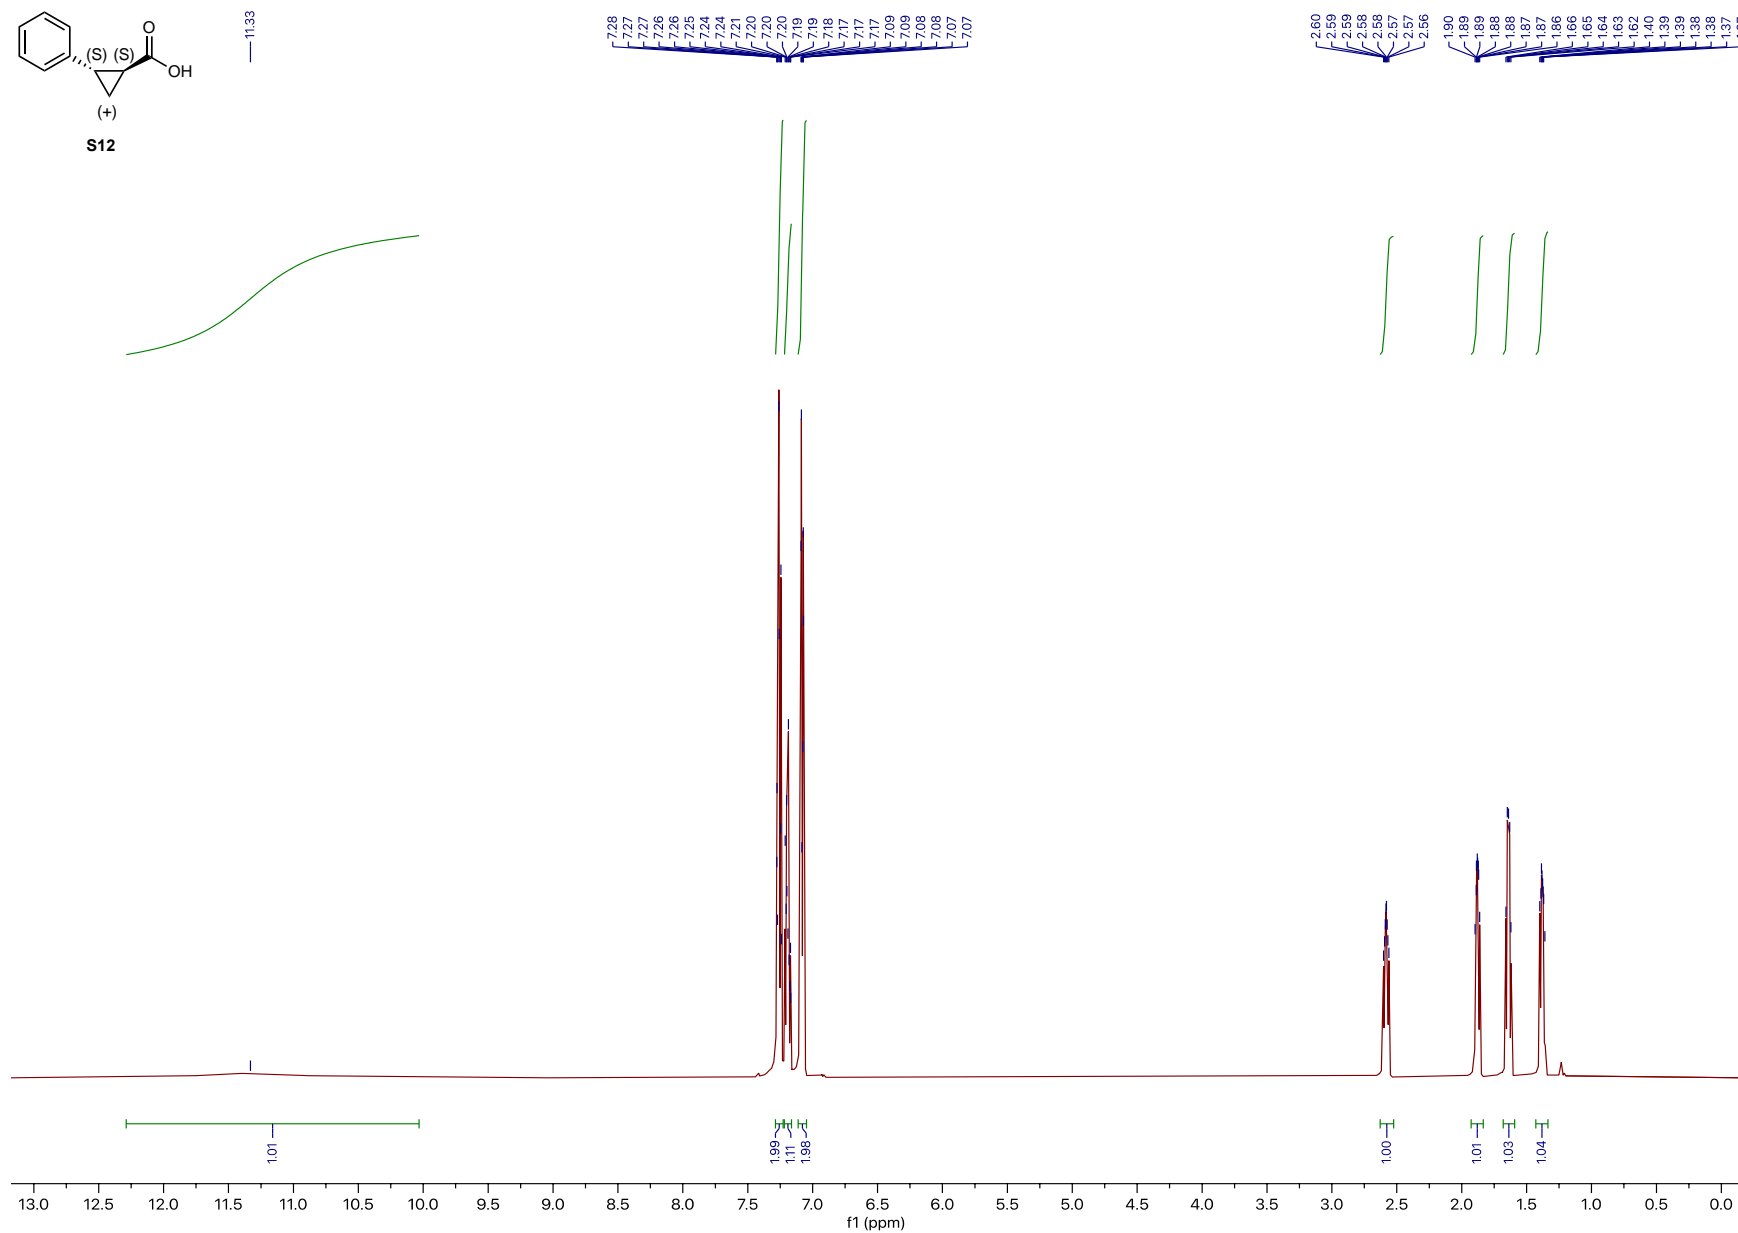

Supplementary Fig. 24 | <sup>1</sup>H-NMR (500 MHz, CDCl<sub>3</sub>) of S12.

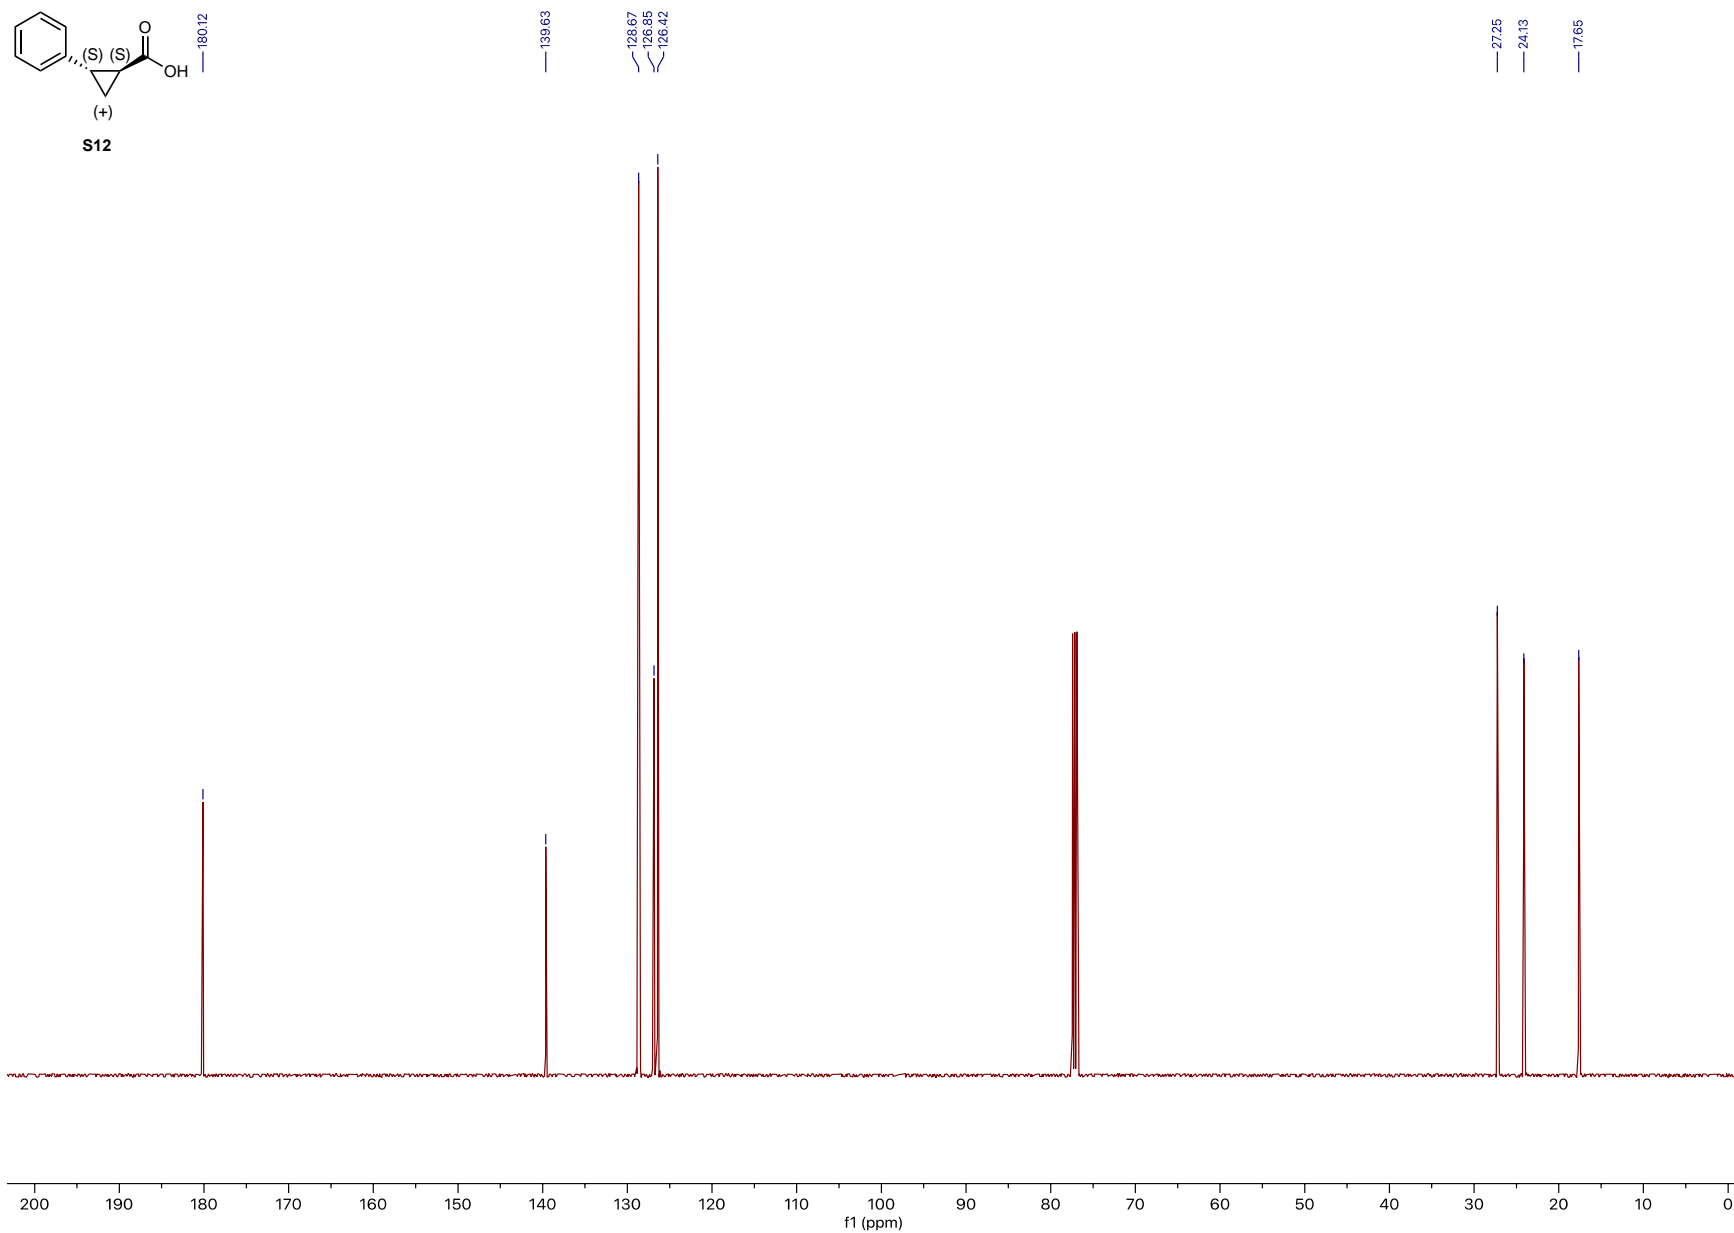

Supplementary Fig. 25 | <sup>13</sup>C-NMR (126 MHz, CDCl<sub>3</sub>) of S12.



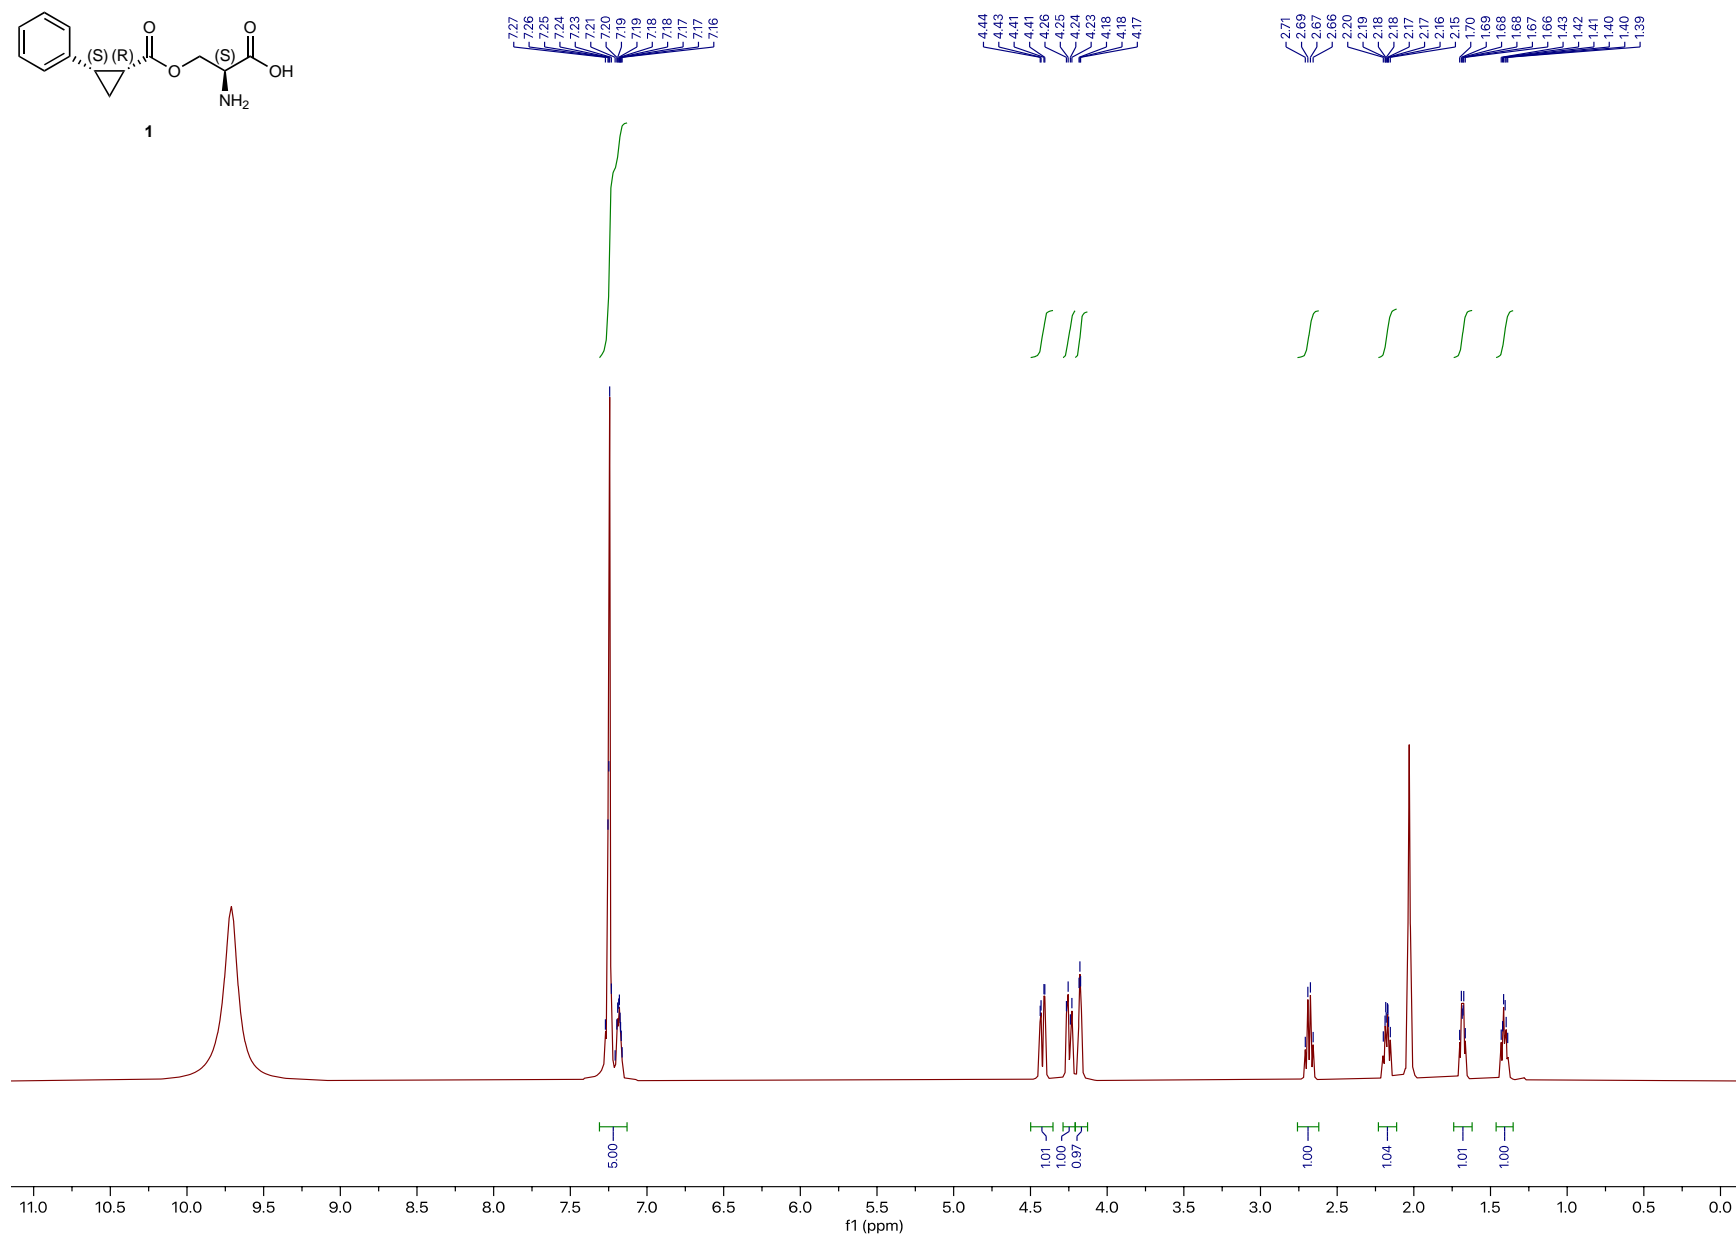

Supplementary Fig. 26 |  $^1\text{H-NMR}$  (500 MHz,  $\text{d}_4\text{-acetic acid}$ ) of **1**.

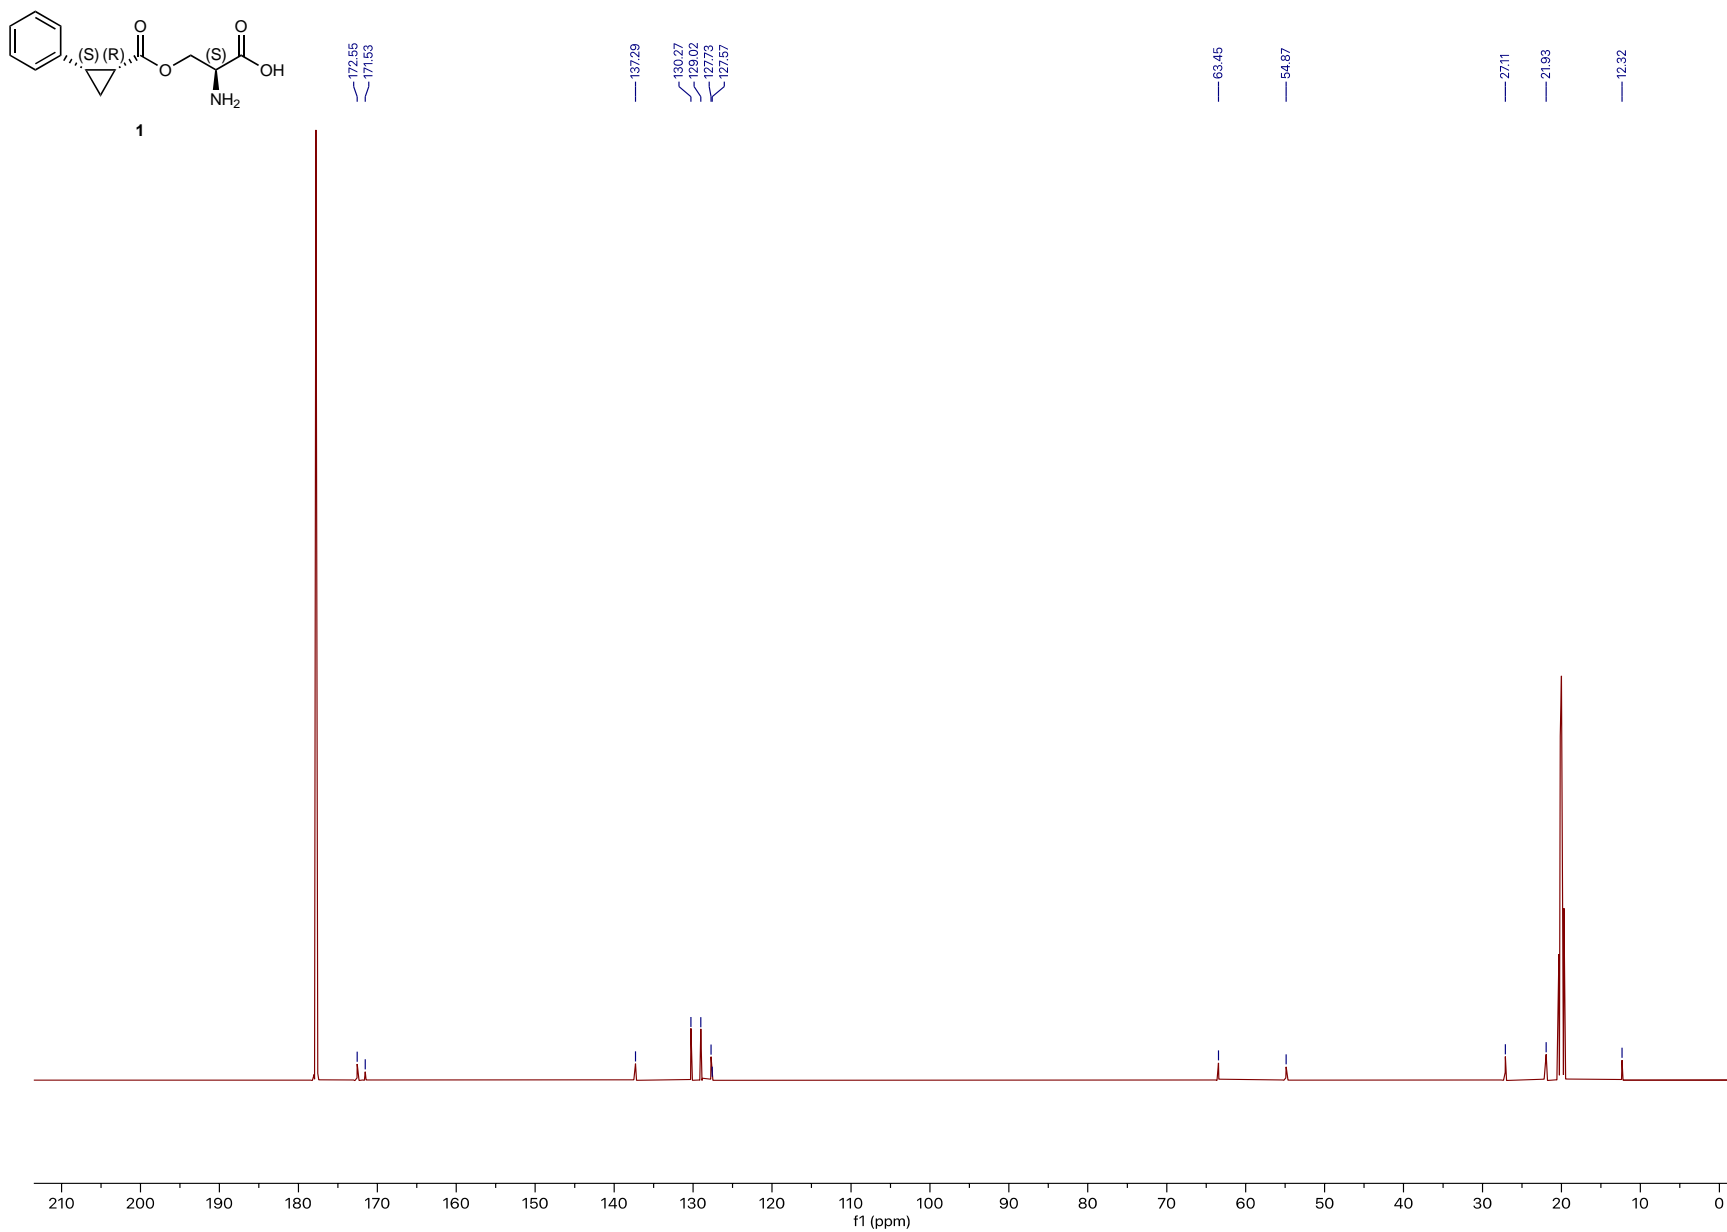

Supplementary Fig. 27 | <sup>13</sup>C-NMR (126 MHz, d<sub>4</sub>-acetic acid) of 1.

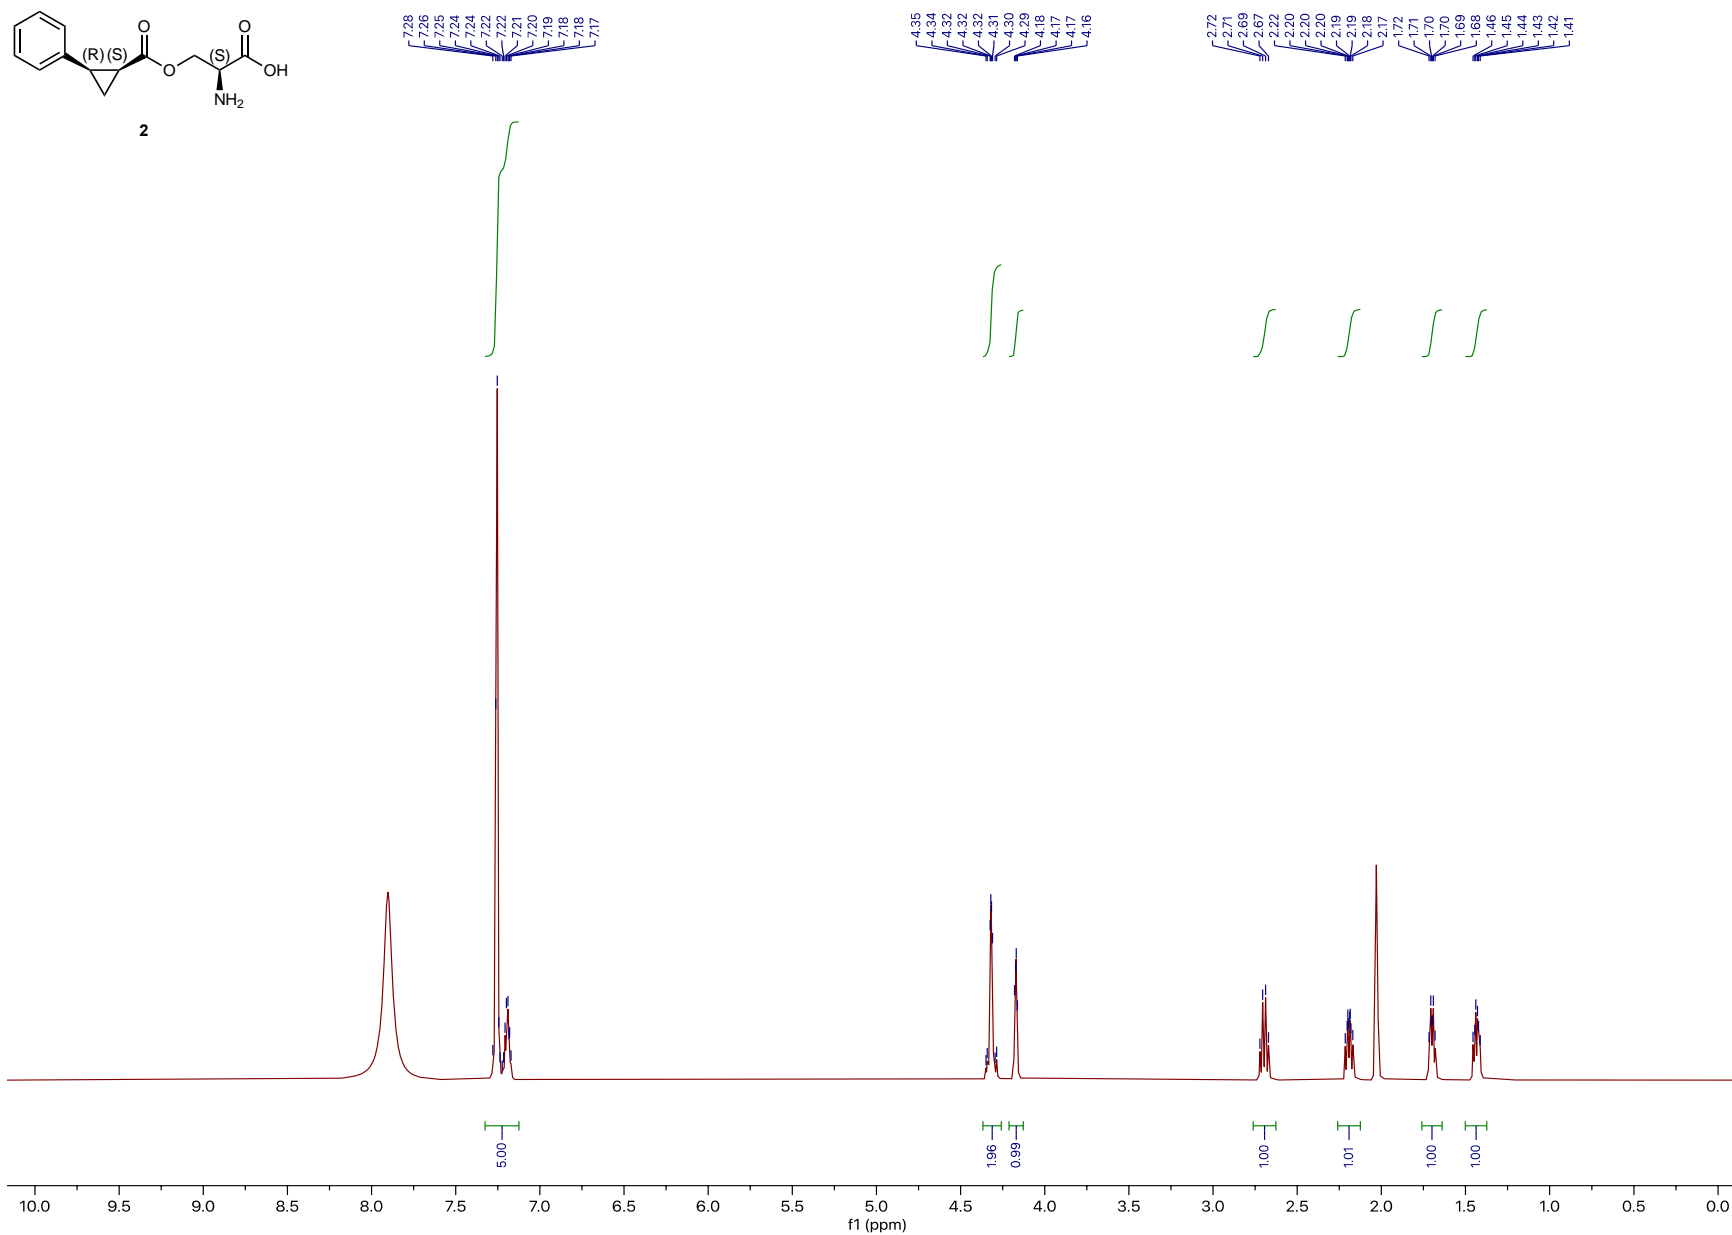

Supplementary Fig. 28 | <sup>1</sup>H-NMR (500 MHz, d<sub>4</sub>-acetic acid) of 2.

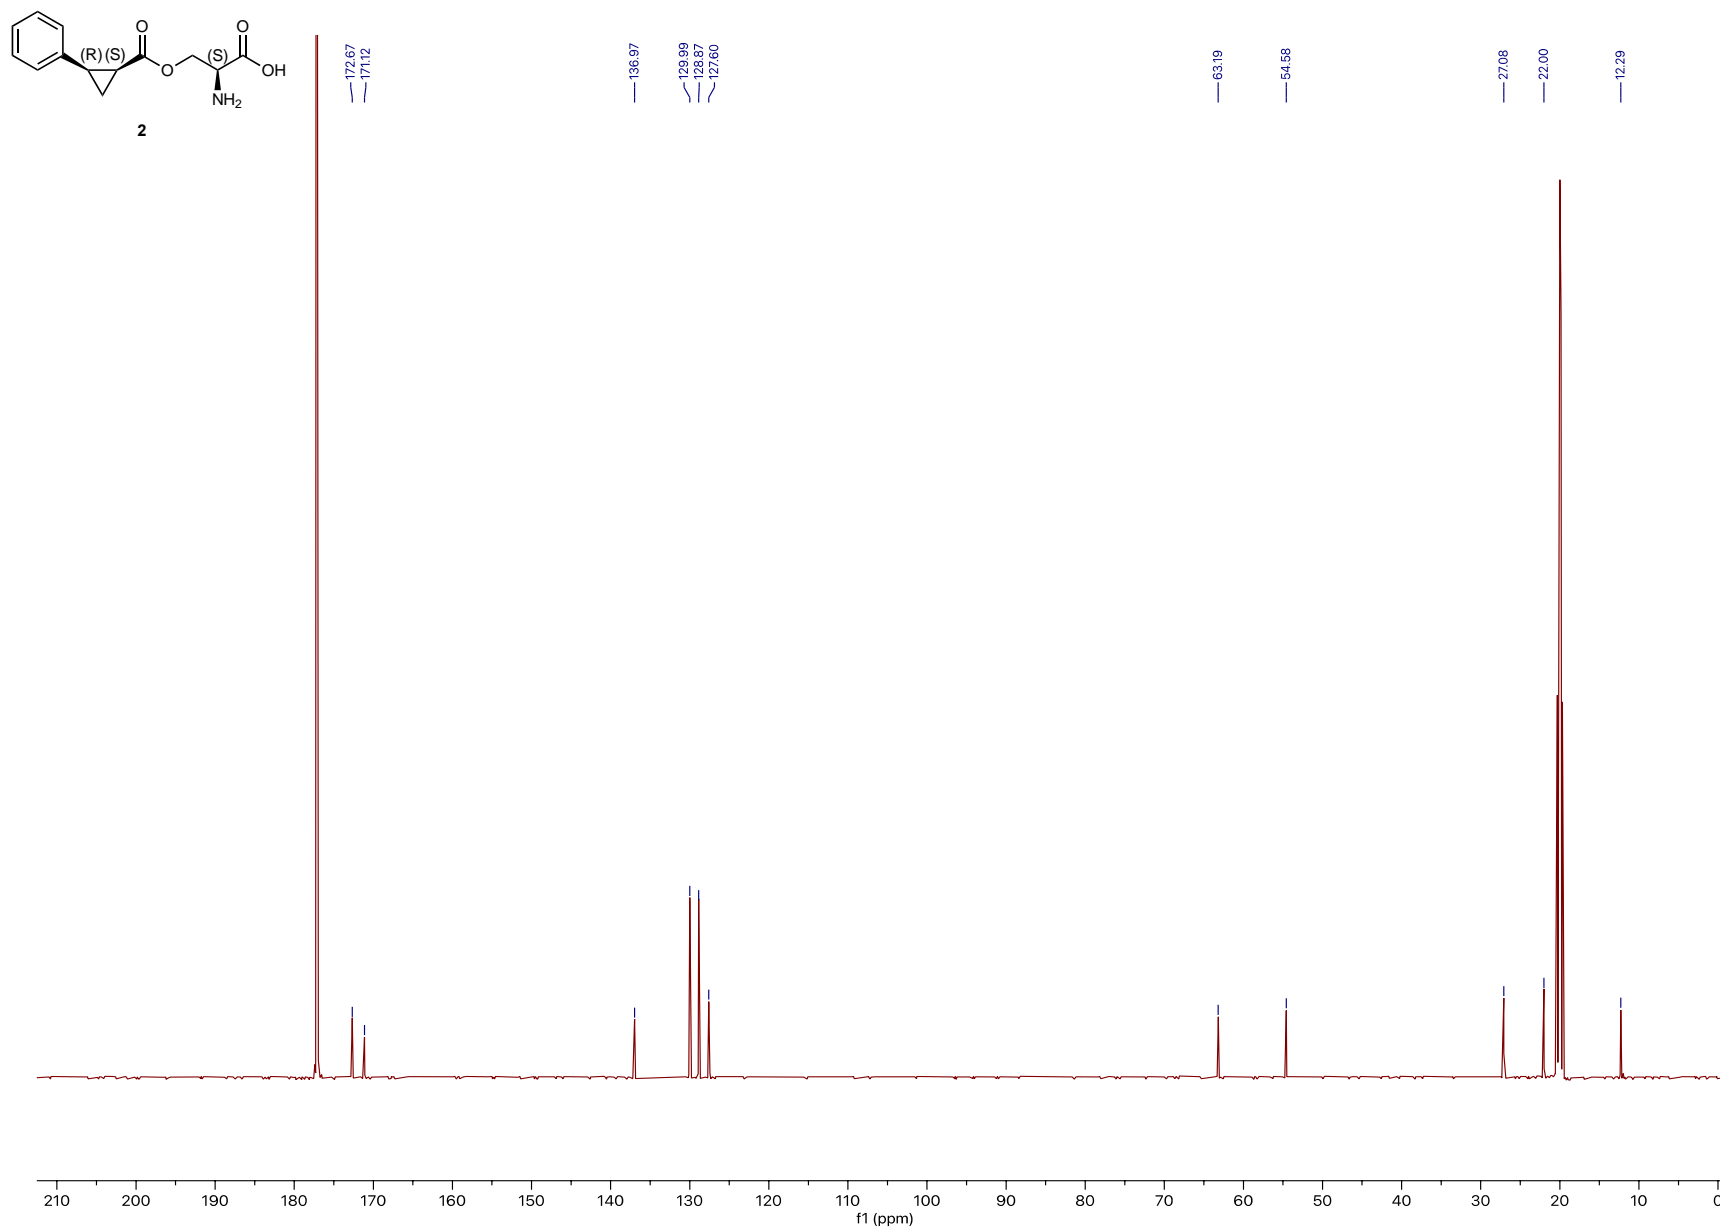

Supplementary Fig. 29 | <sup>13</sup>C-NMR (126 MHz, CDCl<sub>3</sub>) of 2.

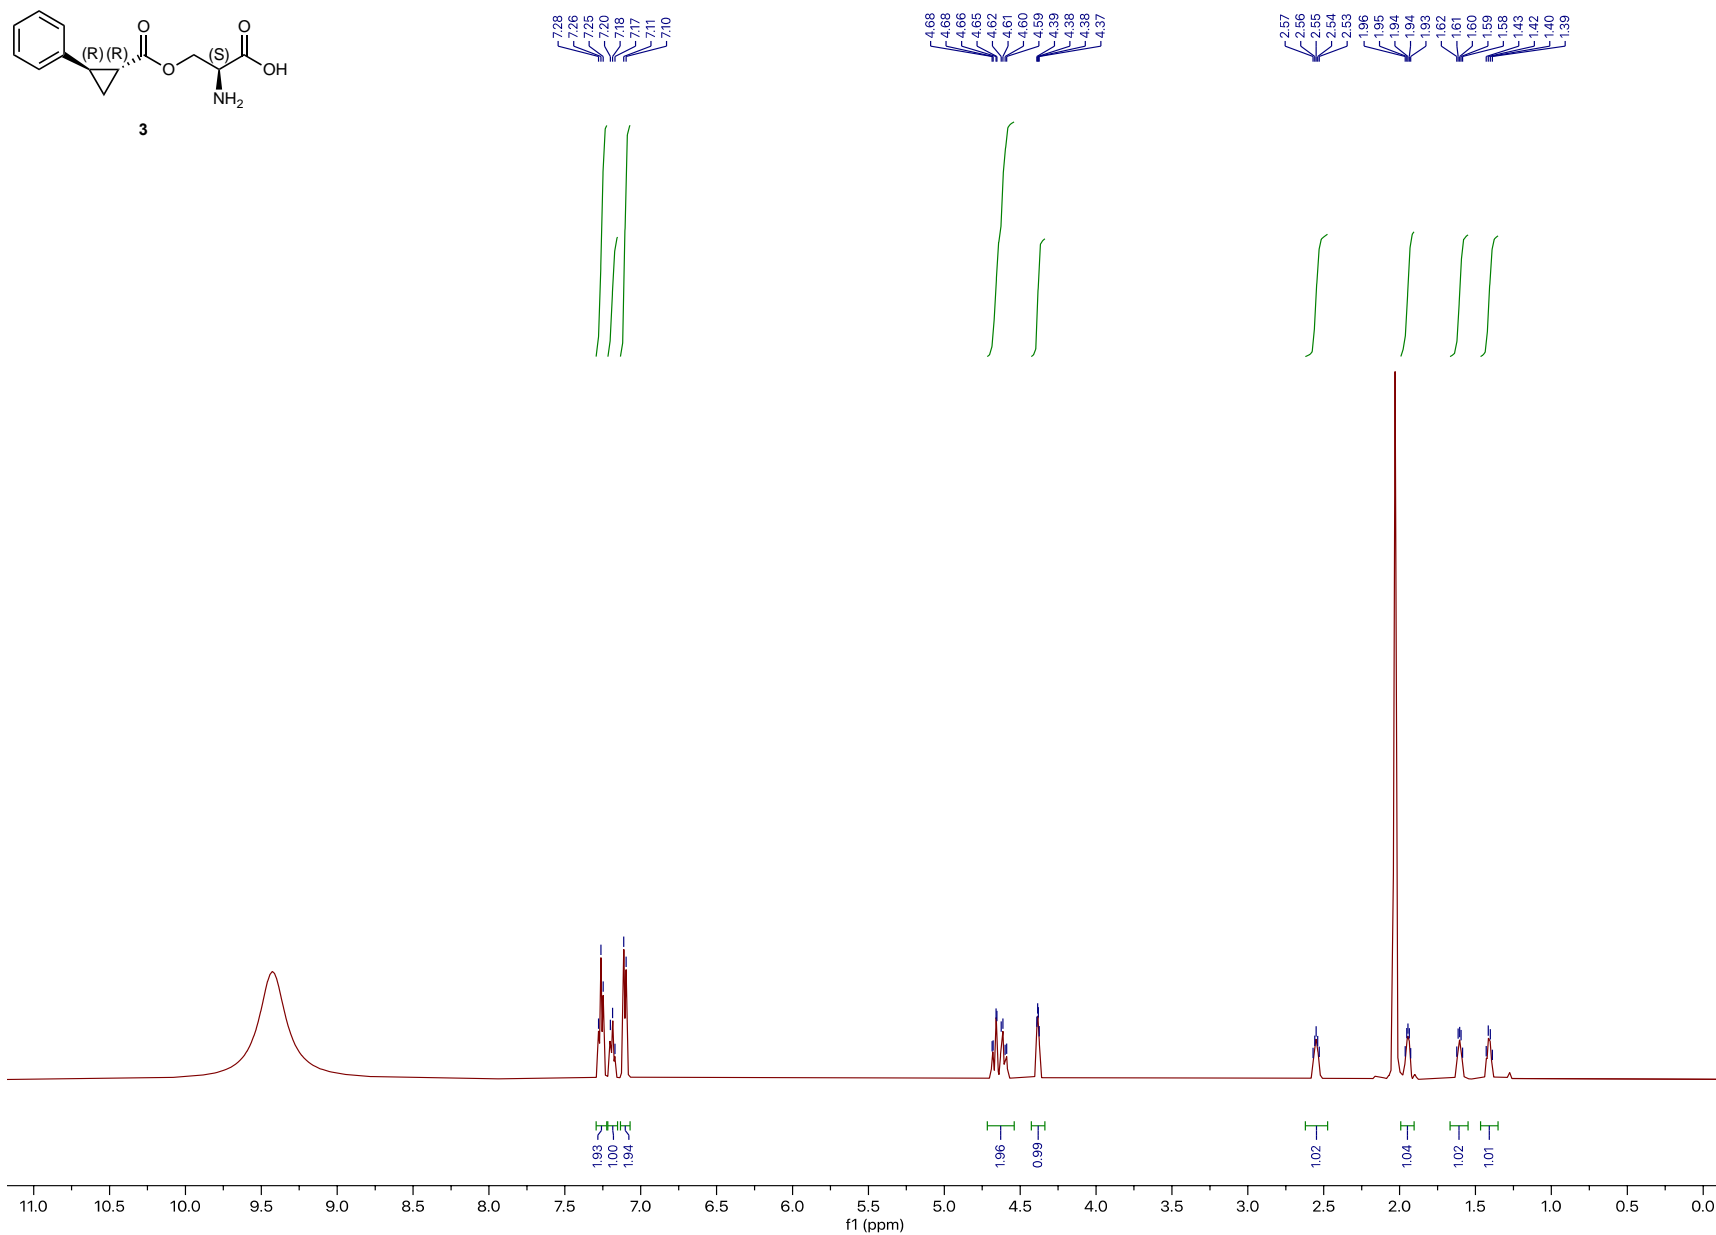

Supplementary Fig. 30 | <sup>1</sup>H-NMR (500 MHz, d<sub>4</sub>-acetic acid) of 3.

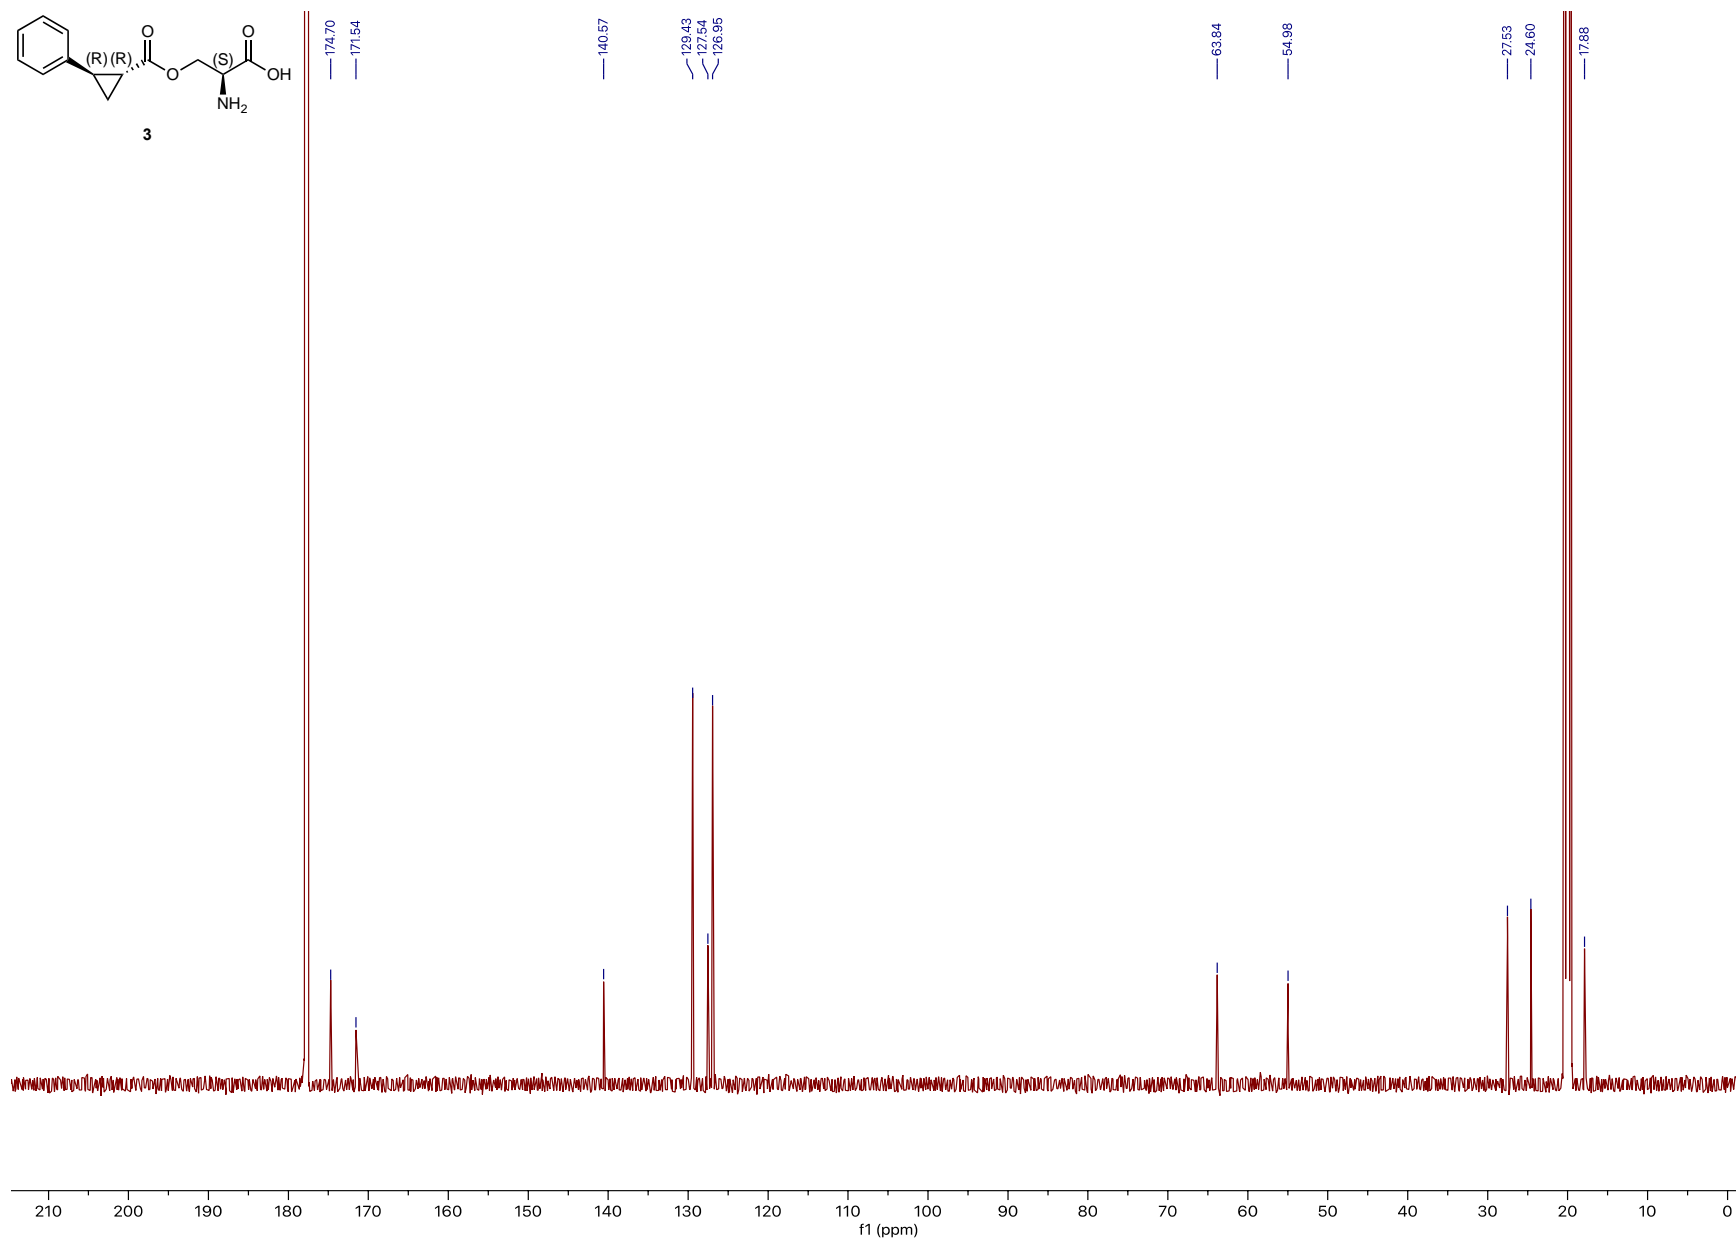

Supplementary Fig. 31 | <sup>13</sup>C-NMR (126 MHz, d<sub>4</sub>-acetic acid) of 3.

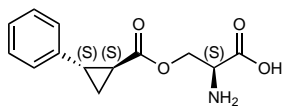

4

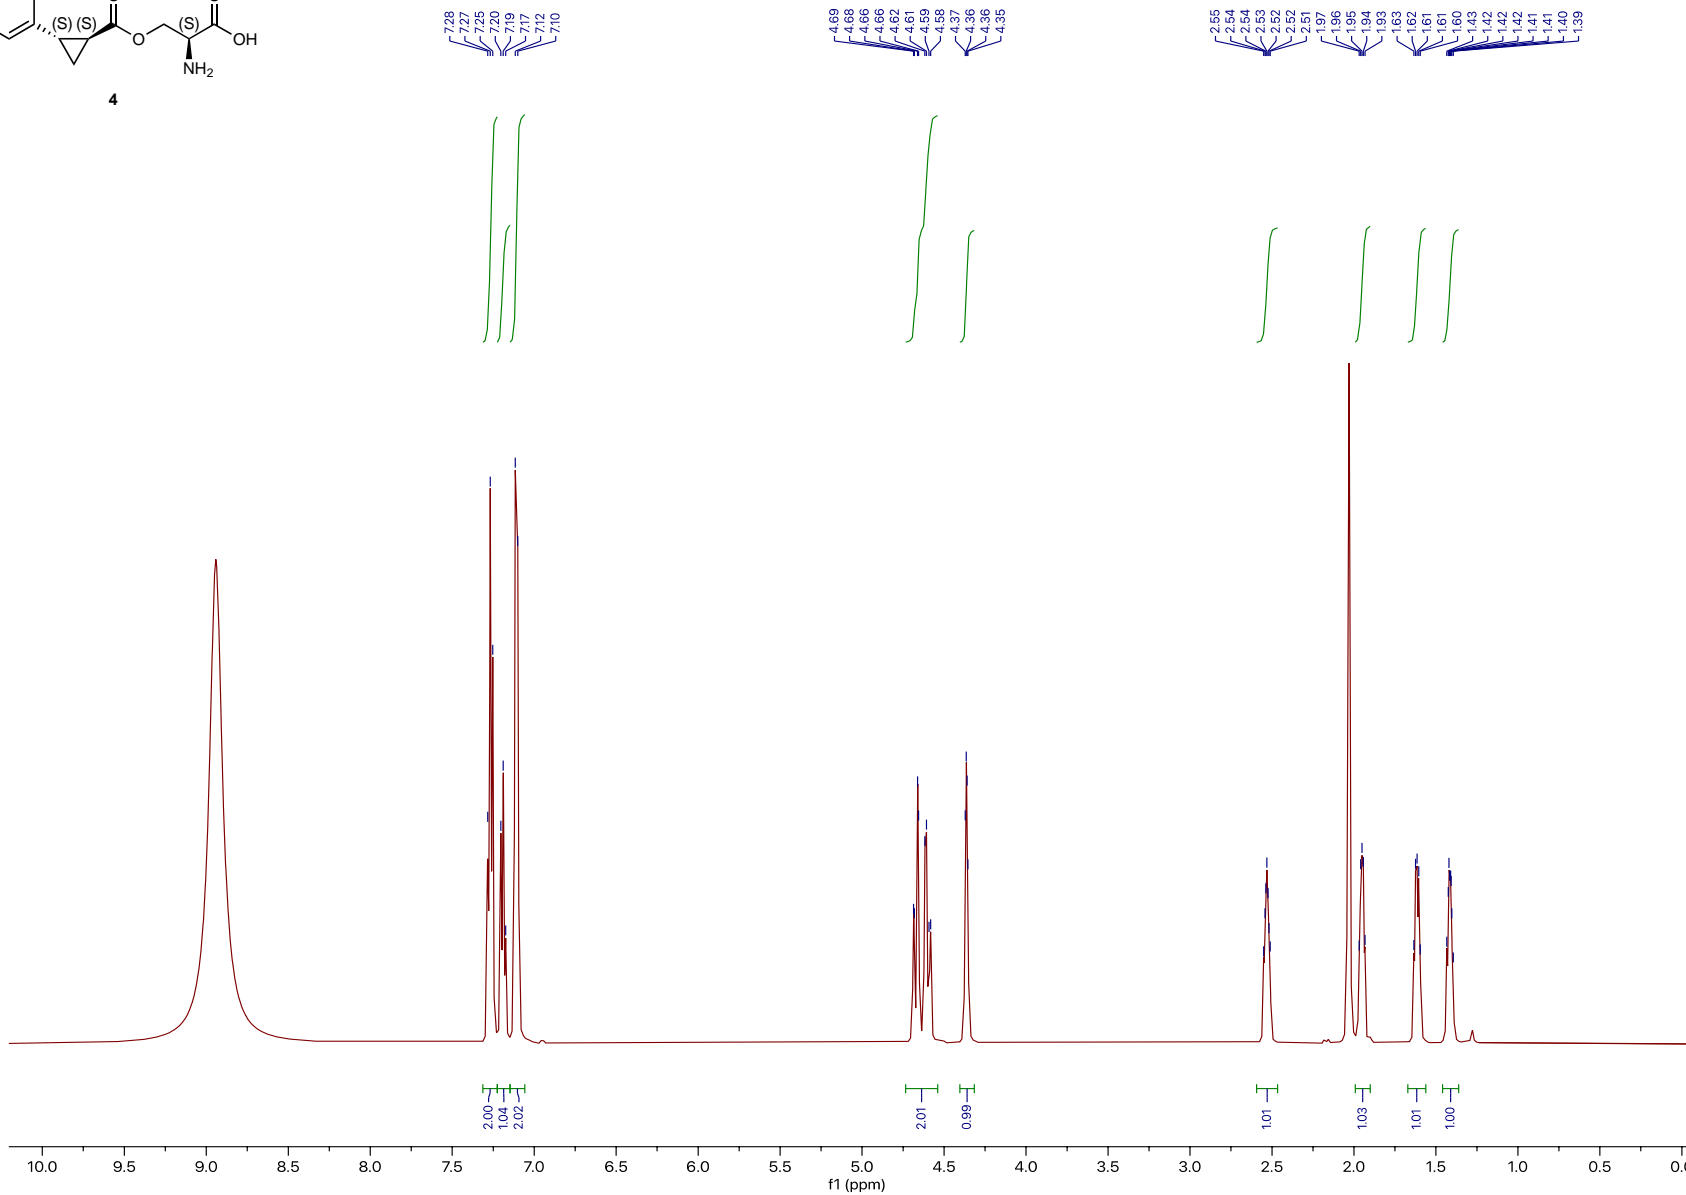

Supplementary Fig. 32 | <sup>1</sup>H-NMR (500 MHz, d<sub>4</sub>-acetic acid) of 4.

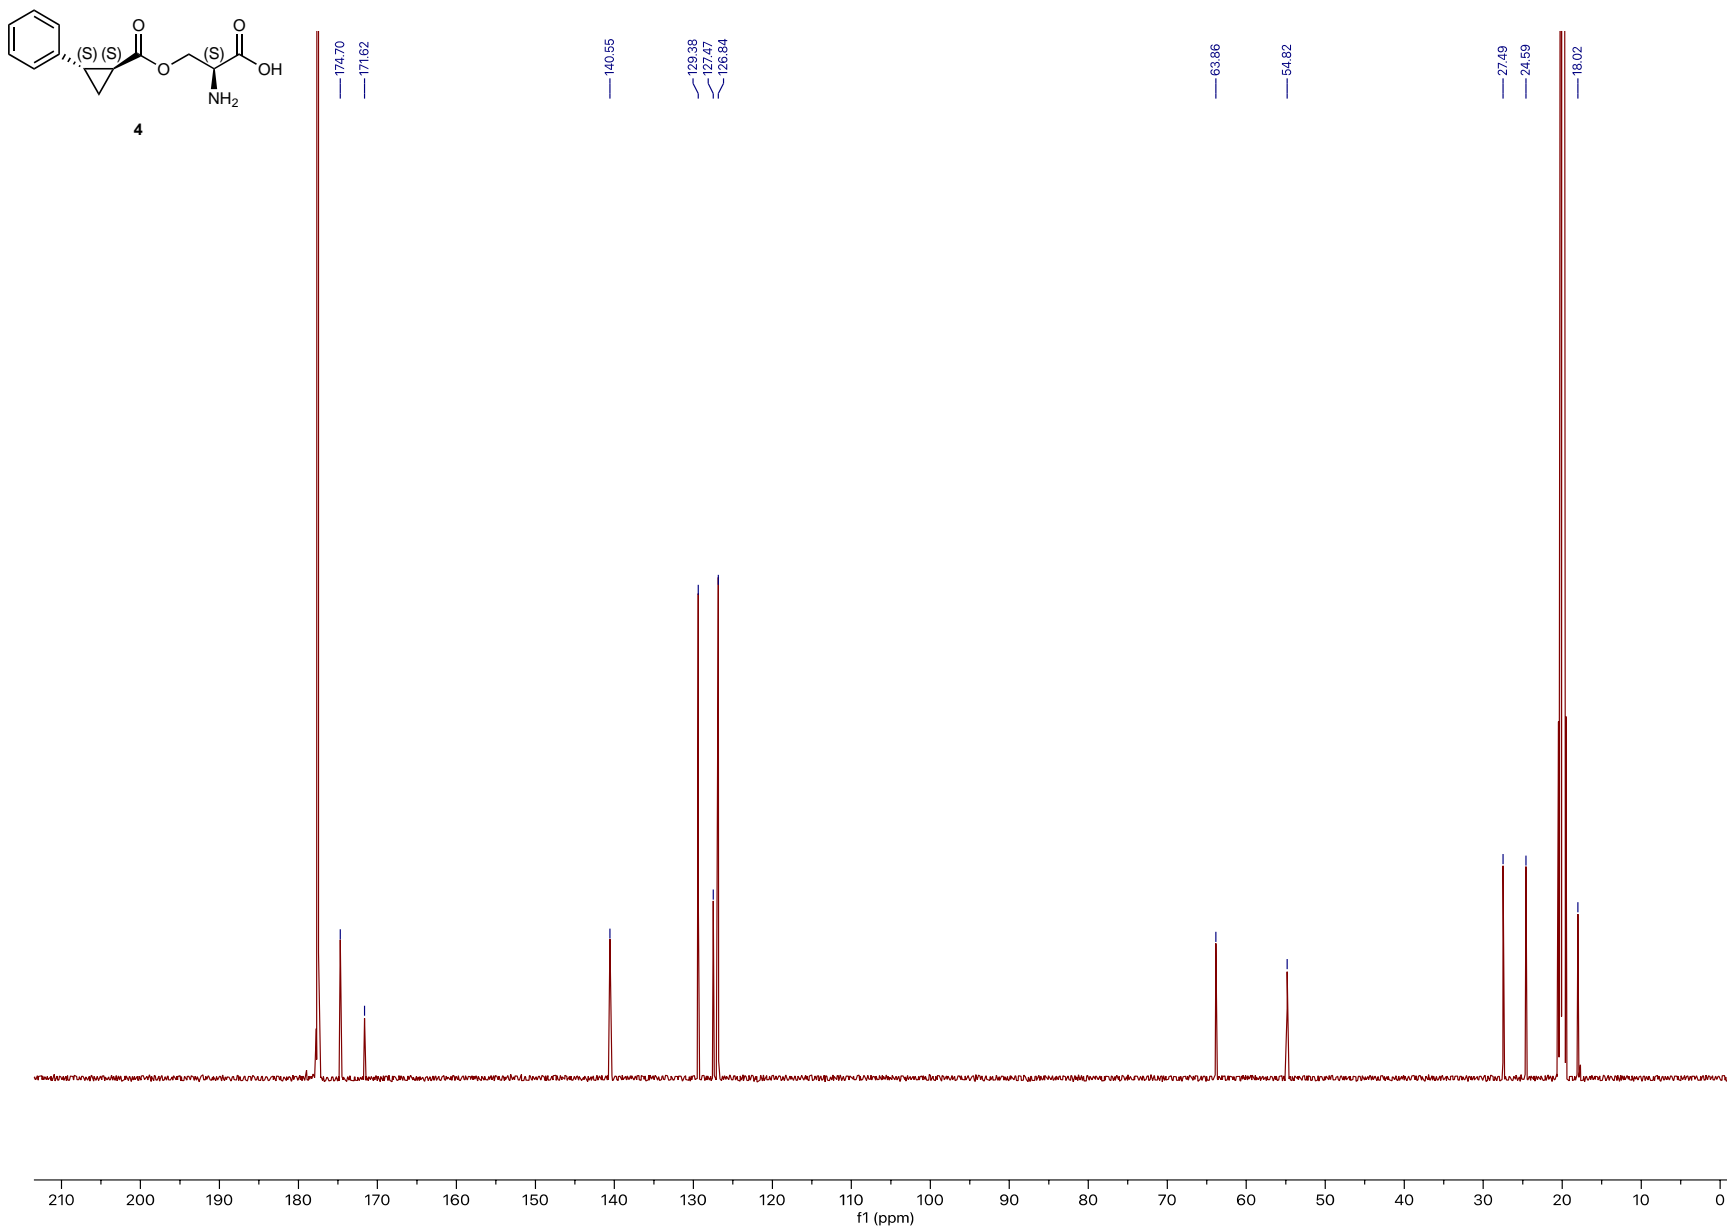

Supplementary Fig. 33 | <sup>13</sup>C-NMR (126 MHz, d<sub>4</sub>-acetic acid) of 4.



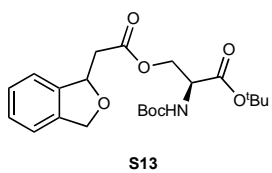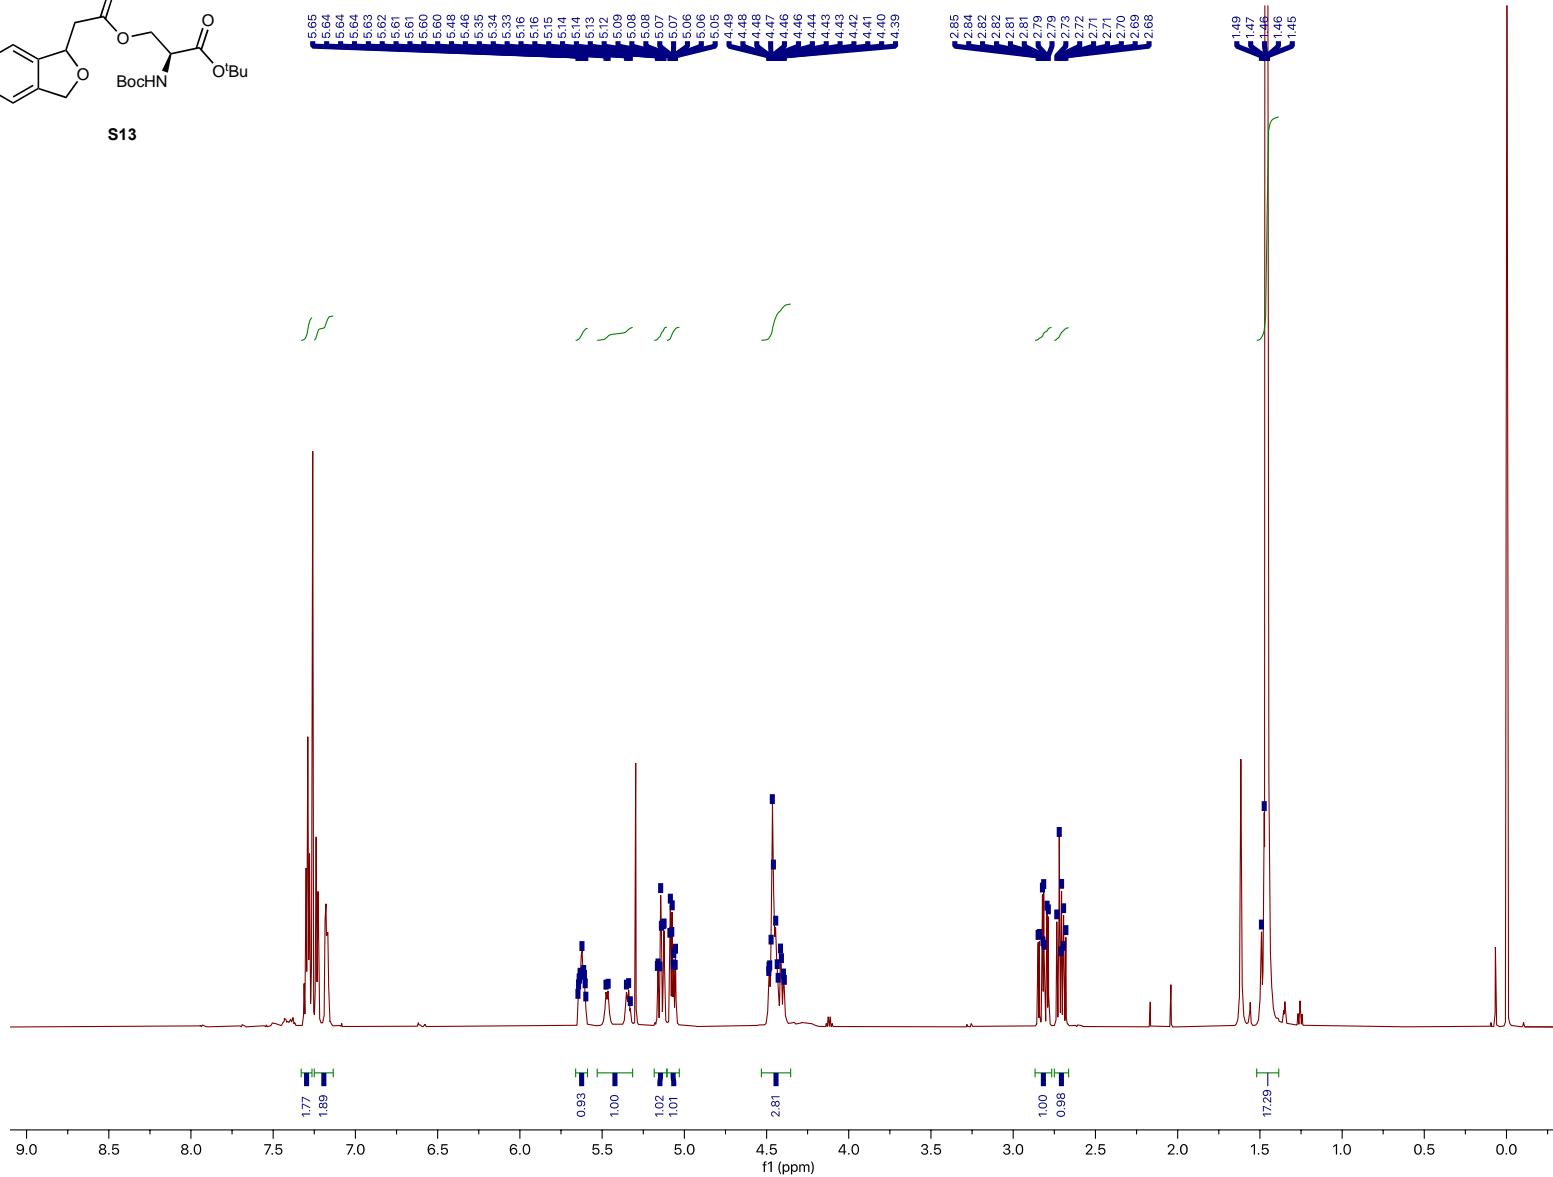

Supplementary Fig. 34 | <sup>1</sup>H-NMR (600 MHz, CDCl<sub>3</sub>) of S13.

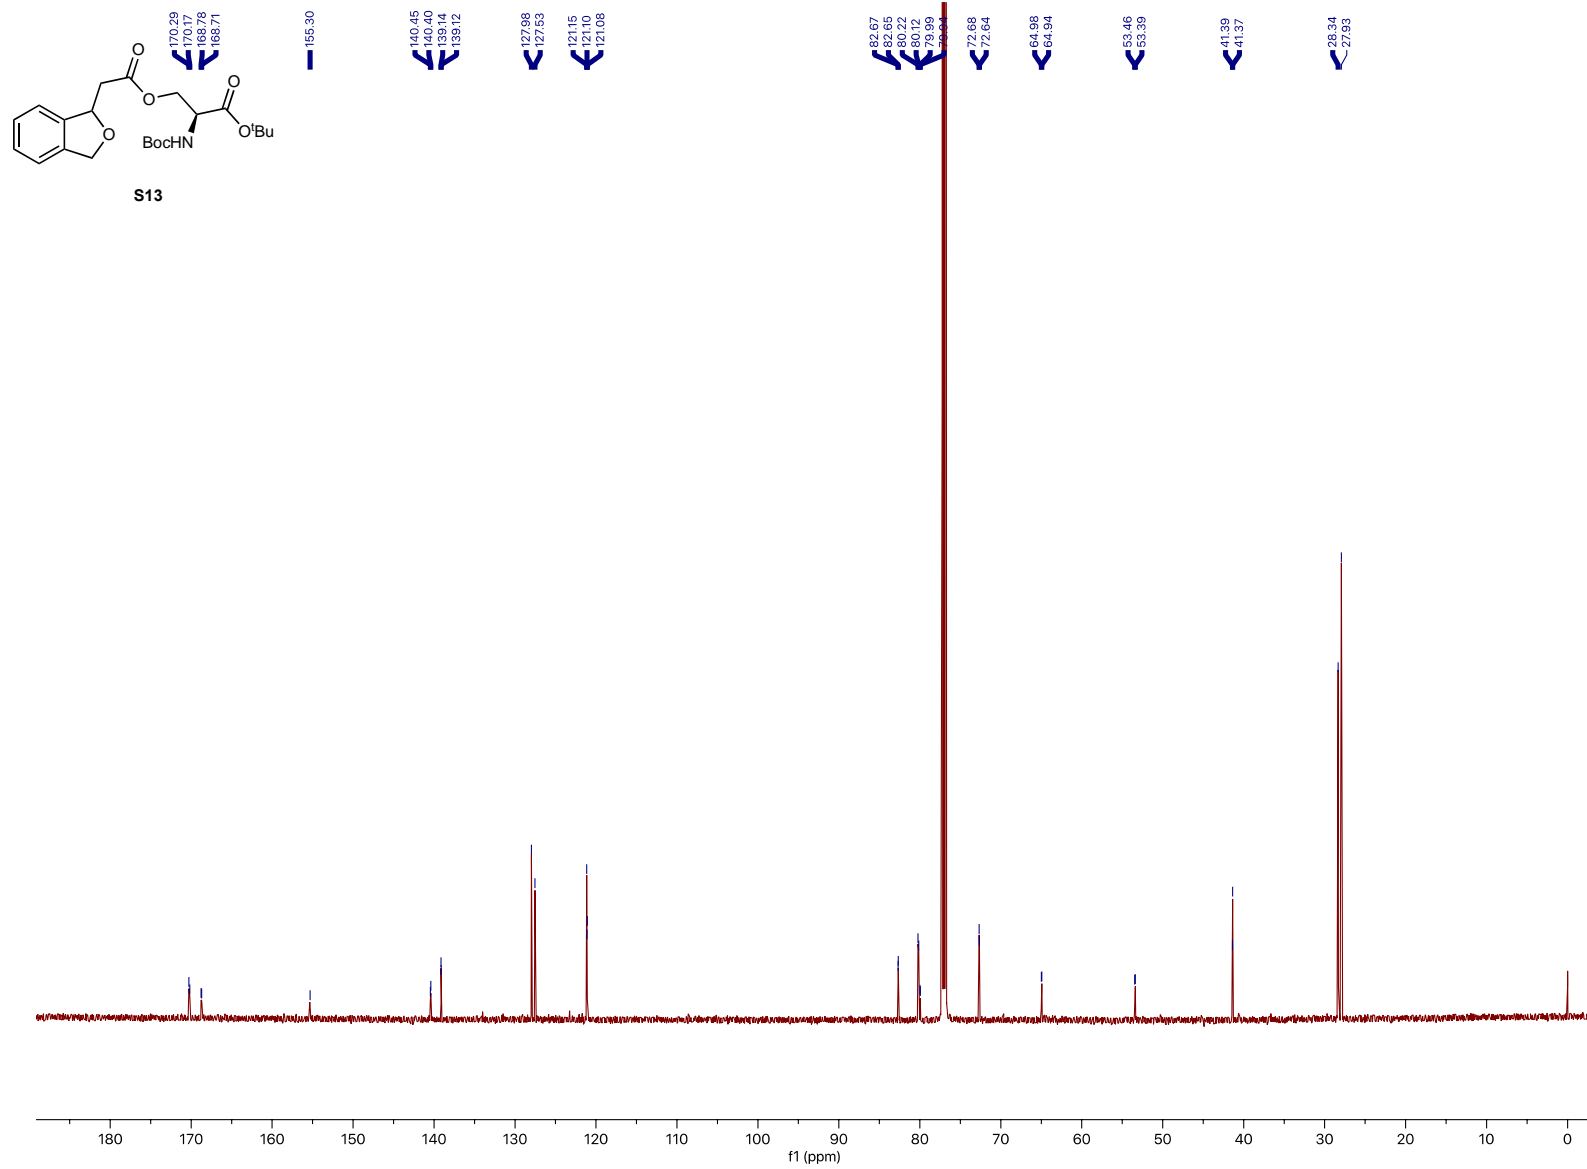

Supplementary Fig. 35 | <sup>13</sup>C-NMR (151 MHz, CDCl<sub>3</sub>) of S13.

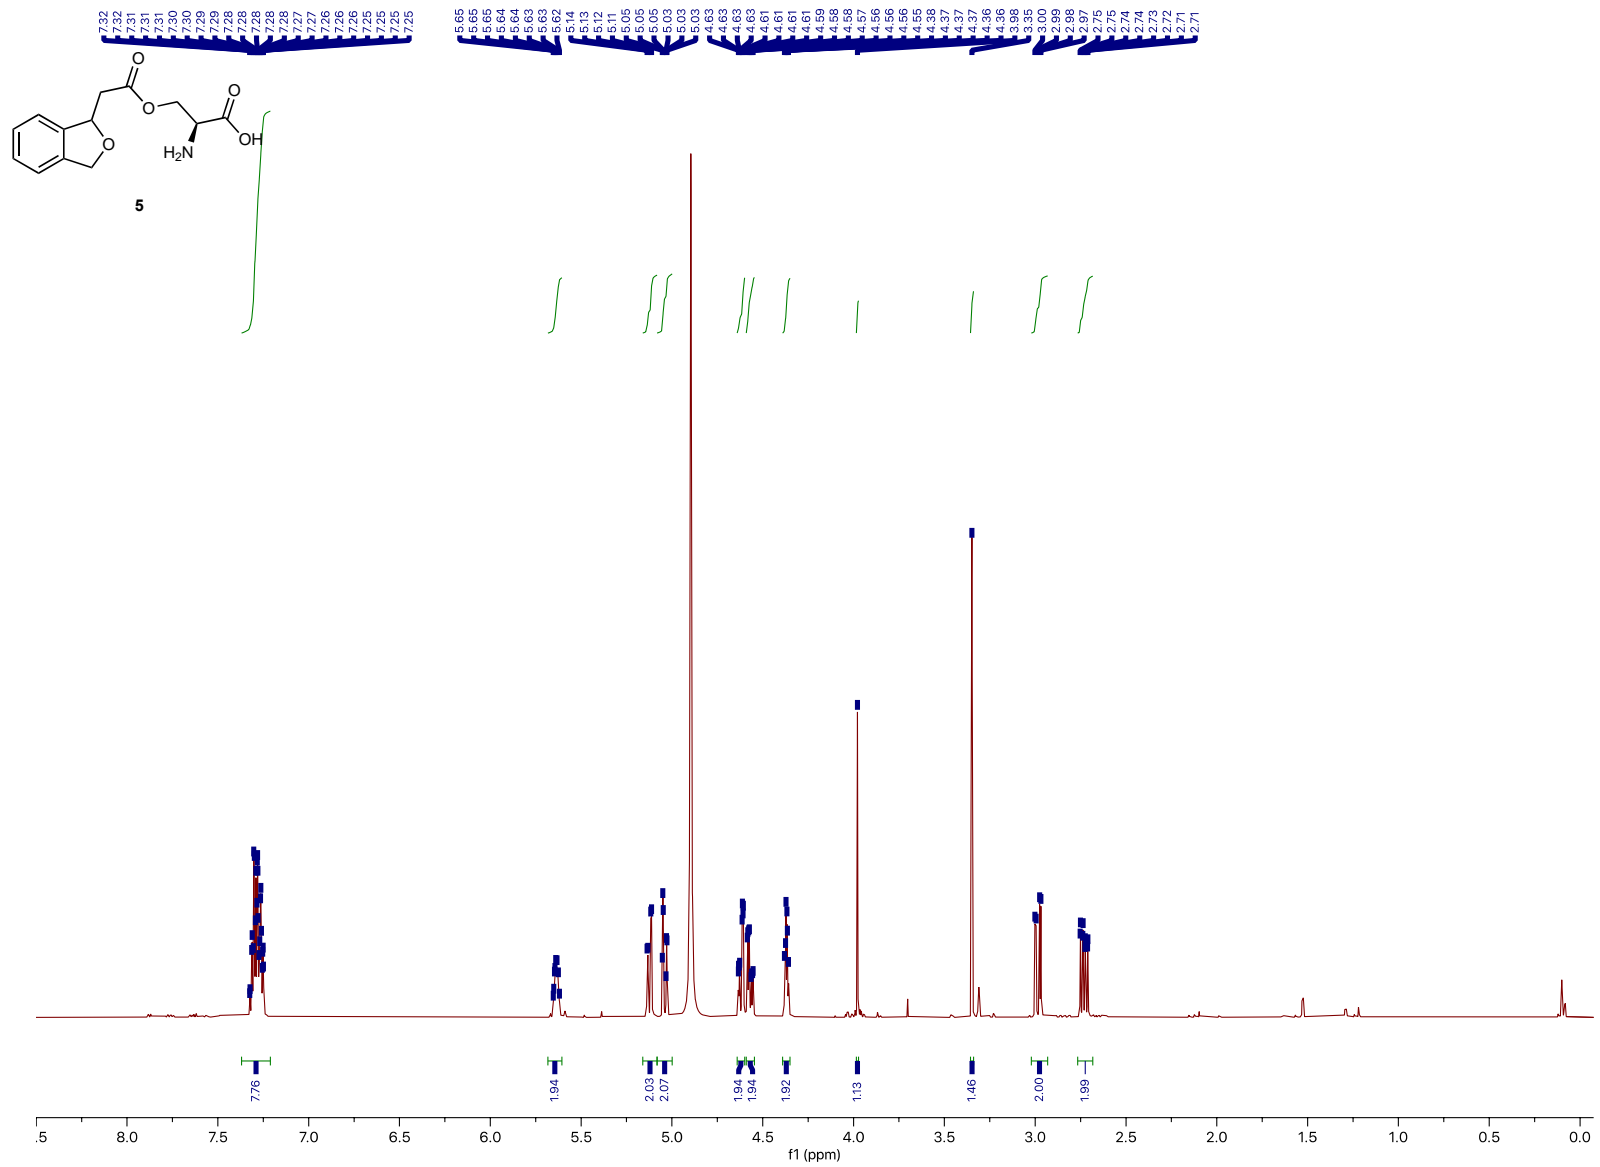

Supplementary Fig. 36 | <sup>1</sup>H-NMR (600 MHz, CD<sub>3</sub>OD) of 5.

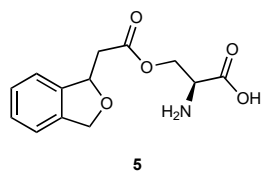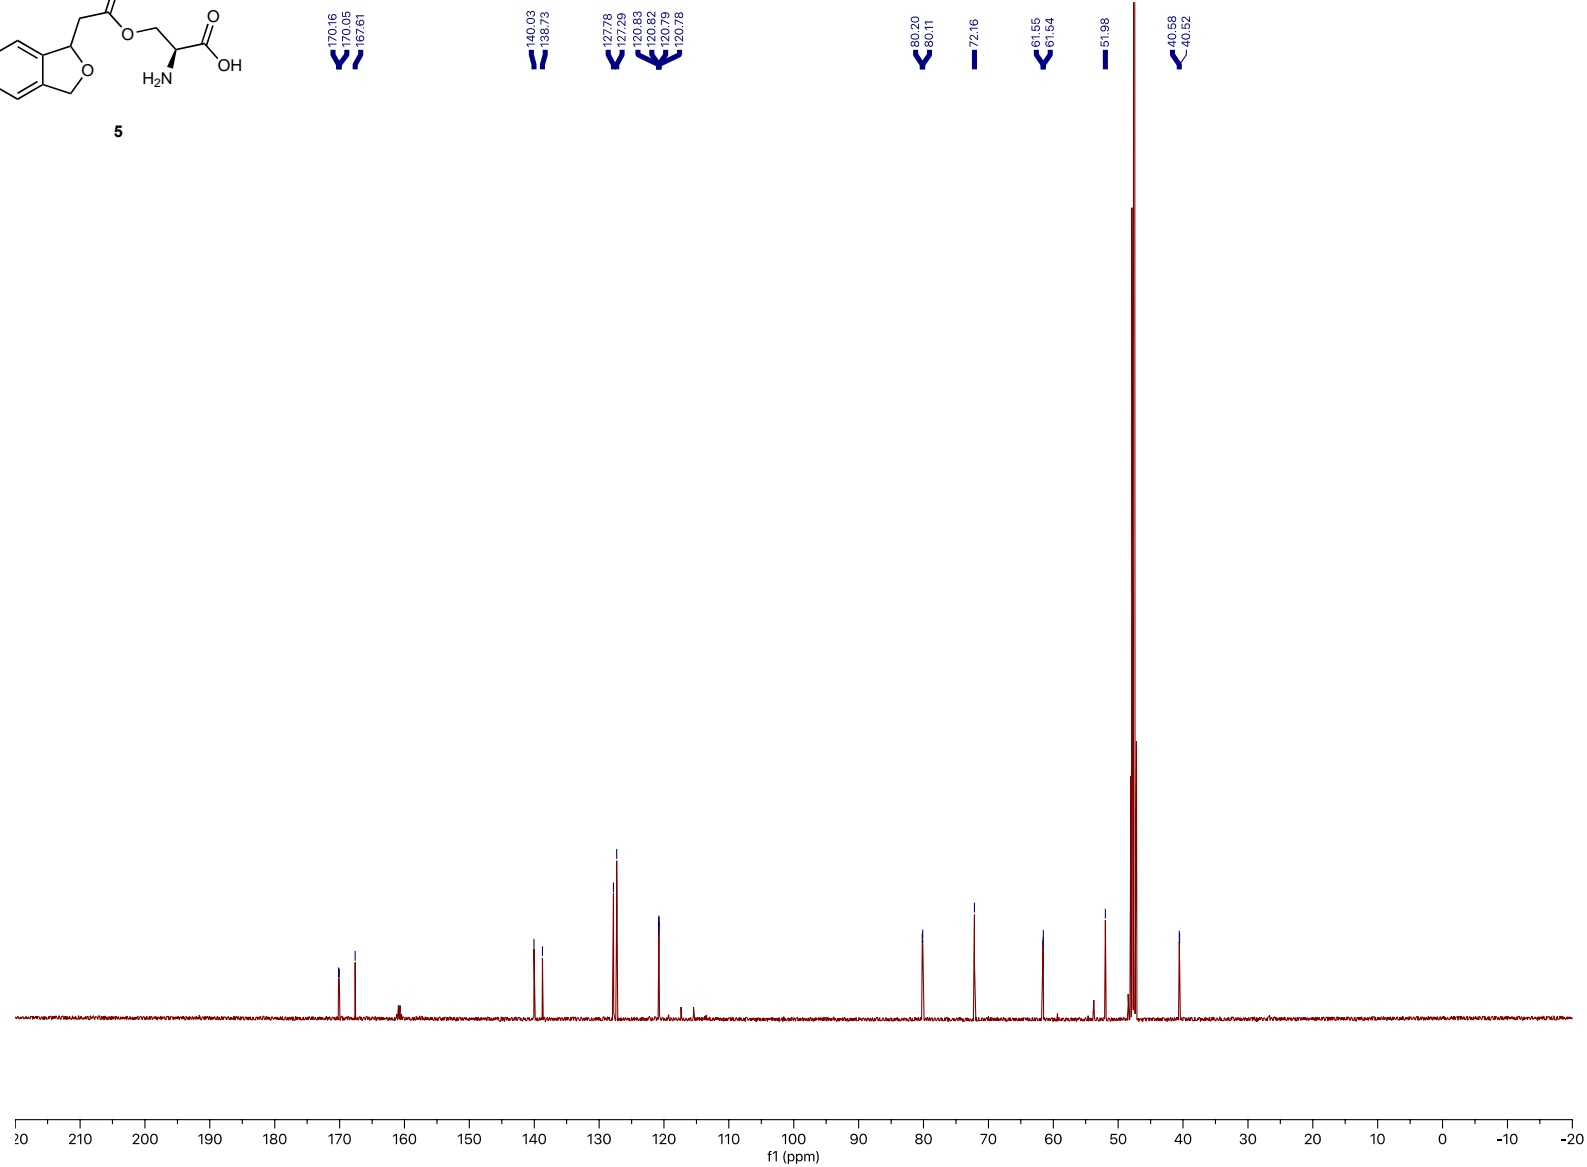

Supplementary Fig. 37 |  $^{13}\text{C}$ -NMR (151 MHz,  $\text{CD}_3\text{OD}$ ) of 5.

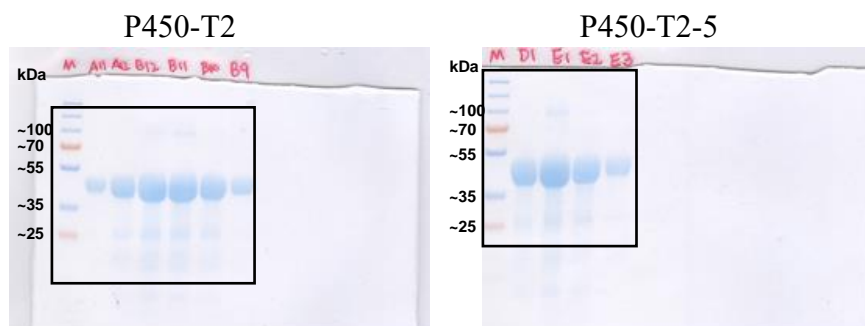

**Supplementary Fig. 38 | Raw gel image for Extended Data Fig. 5a.** Region in black rectangle was displayed.

### Supplementary References

- 65 Gober, J. G. *et al.* P450-mediated non-natural cyclopropanation of dehydroalanine-containing thiopeptides. *ACS Chem. Biol.* **12**, 1726-1731 (2017).
- 66 Nguyen, K. T. *et al.* Characterization of a thermophilic cytochrome P450 of the CYP203A subfamily from Binh Chau hot spring in Vietnam. *FEBS Open Bio* **11**, 124-132 (2021).
- 67 Huang, J. *et al.* Unnatural biosynthesis by an engineered microorganism with heterologously expressed natural enzymes and an artificial metalloenzyme. *Nat. Chem.* **13**, 1186-1191 (2021).
- 68 Wang, Z. J. *et al.* Improved cyclopropanation activity of histidine-ligated cytochrome P450 enables the enantioselective formal synthesis of levomilnacipran. *Angew. Chem. Int. Ed.* **53**, 6810-6813 (2014).
- 69 Li, Y., Huang, J. S., Zhou, Z. Y., Che, C. M. & You, X. Z. Remarkably stable iron porphyrins bearing nonheteroatom-stabilized carbene or (alkoxycarbonyl) carbenes: isolation, X-ray crystal structures, and carbon atom transfer reactions with hydrocarbons. *J. Am. Chem. Soc.* **124**, 13185-13193 (2002).
- 70 Rosenberg, M. L., Vlasana, K., Sen Gupta, N., Wragg, D. & Tilset, M. Highly cis-selective Rh(I)-catalyzed cyclopropanation reactions. *J. Org. Chem.* **76**, 2465-2470 (2011).
- 71 Concellon, J. M., Rodriguez-Solla, H. & Simal, C. The first cyclopropanation reaction of unmasked alpha,beta-unsaturated carboxylic acids: direct and complete stereospecific synthesis of cyclopropanecarboxylic acids promoted by Sm/CHI<sub>3</sub>. *Org. Lett.* **9**, 2685-2688 (2007).

- 72 Evans, D. A., Britton, T. C. & Ellman, J. A. Contrasteric carboximide hydrolysis with lithium hydroperoxide. *Tetrahedron Lett.* **28**, 6141-6144 (1987).
- 73 Cheng, K. J. *et al.* Probes for narcotic receptor mediated phenomena. 41. Unusual inverse mu-agonists and potent mu-opioid antagonists by modification of the N-substituent in enantiomeric 5-(3-hydroxyphenyl)morphans. *J. Med. Chem.* **54**, 957-969 (2011).
